# Supplementary material for: Activation of NRF2 Signaling Pathway Delays the Progression of Hyperuricemic Nephropathy by Reducing Oxidative Stress
Source: Antioxidants (Basel). 2023 Apr 28;12(5):1022. doi: 10.3390/antiox12051022 (PMC10215166; doi:10.3390/antiox12051022)
Supplement: Supplementary file 1 [file antioxidants-12-01022-s001.zip › Supplementary_Material2-Table S.csv]

Gene_id	Gene name	Gene description	FC(mk/Wk)	Log2FC(mk/Wk)	Pvalue	Padjust	Significant	Regulate	W1k	W2k	W3k	m1k	m2k	m3k	Wk	mk
ENSMUSG00000032758	Kap	kidney androgen regulated protein [Source:MGI Symbol;Acc:MGI:96653]	0.006	-7.409720938	2.20E-296	4.04E-292	yes	down	74781.01	57789.18	42590.19	98.57	70.39	64.63	58386.79333	77.86333333
ENSMUSG00000030935	Acsm3	acyl-CoA synthetase medium-chain family member 3 [Source:MGI Symbol;Acc:MGI:99538]	0.011	-6.458135393	5.89E-243	5.42E-239	yes	down	288.11	263.21	160.79	0.51	0.76	1.34	237.37	0.87
ENSMUSG00000004552	Ctse	cathepsin E [Source:MGI Symbol;Acc:MGI:107361]	181.898	7.506982836	9.94E-225	6.09E-221	yes	up	1.35	0.97	1.58	83.98	98.08	52.07	1.3	78.04333333
MSTRG.3949		-	76.318	6.253960419	4.62E-213	2.13E-209	yes	up	0.52	0.44	0.34	8.42	7.53	6.31	0.433333333	7.42
ENSMUSG00000061906	Ugt2b38	UDP glucuronosyltransferase 2 family, polypeptide B38 [Source:MGI Symbol;Acc:MGI:2140794]	0.02	-5.661966275	3.27E-192	1.20E-188	yes	down	572.59	548.63	328.96	2.87	2.03	1.57	483.3933333	2.156666667
ENSMUSG00000024650	Slc22a6	solute carrier family 22 (organic anion transporter), member 6 [Source:MGI Symbol;Acc:MGI:892001]	0.007	-7.079608083	2.85E-189	8.72E-186	yes	down	146.18	163.75	95.2	0.17	0.24	0.25	135.0433333	0.22
ENSMUSG00000020432	Tcn2	transcobalamin 2 [Source:MGI Symbol;Acc:MGI:98534]	0.033	-4.900417229	4.28E-154	1.12E-150	yes	down	529.72	522.13	257.43	3.89	3.56	2.22	436.4266667	3.223333333
ENSMUSG00000028713	Cyp4b1	cytochrome P450, family 4, subfamily b, polypeptide 1 [Source:MGI Symbol;Acc:MGI:103225]	0.008	-6.932989039	1.61E-137	3.71E-134	yes	down	1032.27	1145.39	473.01	1.59	1.15	1.66	883.5566667	1.466666667
ENSMUSG00000026822	Lcn2	lipocalin 2 [Source:MGI Symbol;Acc:MGI:96757]	207.509	7.697027958	2.52E-137	5.15E-134	yes	up	1.33	0.6	0.61	49.64	38.83	29.01	0.846666667	39.16
ENSMUSG00000039438	Ttc36	tetratricopeptide repeat domain 36 [Source:MGI Symbol;Acc:MGI:2384760]	0.033	-4.937424333	4.94E-129	9.09E-126	yes	down	1070.5	1321.74	990.67	12.1	11.05	7.39	1127.636667	10.18
ENSMUSG00000024164	C3	complement component 3 [Source:MGI Symbol;Acc:MGI:88227]	107.776	6.751888688	2.36E-128	3.94E-125	yes	up	2.71	5.62	2.43	119.77	101.24	62.37	3.586666667	94.46
ENSMUSG00000029103	Lrpap1	low density lipoprotein receptor-related protein associated protein 1 [Source:MGI Symbol;Acc:MGI:96829]	0.057	-4.122626906	8.75E-124	1.34E-120	yes	down	245.57	274.35	155.15	1.94	1.99	1.72	225.0233333	1.883333333
MSTRG.20027		-	244.875	7.935900494	9.68E-124	1.37E-120	yes	up	0.17	0.23	0.21	14.2	15.52	6.24	0.203333333	11.98666667
ENSMUSG00000030945	Acsm2	acyl-CoA synthetase medium-chain family member 2 [Source:MGI Symbol;Acc:MGI:2385289]	0.026	-5.291486836	5.83E-121	7.66E-118	yes	down	917.24	823.37	380.23	2.8	2.23	1.89	706.9466667	2.306666667
ENSMUSG00000013698	Pea15a	phosphoprotein enriched in astrocytes 15A [Source:MGI Symbol;Acc:MGI:104799]	14.28	3.835936653	9.97E-114	1.22E-110	yes	up	13.04	14.57	8.43	43.33	48.21	25.3	12.01333333	38.94666667
ENSMUSG00000024892	Pcx	pyruvate carboxylase [Source:MGI Symbol;Acc:MGI:97520]	0.045	-4.486815035	6.80E-111	7.36E-108	yes	down	43.4	39.56	24.51	0.4	0.34	0.33	35.82333333	0.356666667
ENSMUSG00000031884	Ces2d-ps	carboxylesterase 2D, pseudogene [Source:MGI Symbol;Acc:MGI:3704319]	0.011	-6.494109026	1.25E-109	1.28E-106	yes	down	281.32	316.25	185.08	0.81	0.39	0.78	260.8833333	0.66
ENSMUSG00000003477	Inmt	indolethylamine N-methyltransferase [Source:MGI Symbol;Acc:MGI:102963]	0.016	-5.924568901	8.39E-108	8.12E-105	yes	down	495.58	628.09	306.06	2.27	1.24	1.65	476.5766667	1.72
ENSMUSG00000069306	Hist1h4m	histone cluster 1, H4m [Source:MGI Symbol;Acc:MGI:2448441]	31.478	4.976262147	2.68E-106	2.47E-103	yes	up	0.88	0.68	0.74	5.72	6.34	4.63	0.766666667	5.563333333
MSTRG.6196		-	602.023	9.233674917	3.00E-105	2.59E-102	yes	up	0.67	0.25	0.68	113	84.28	44.41	0.533333333	80.56333333
ENSMUSG00000022613	Miox	myo-inositol oxygenase [Source:MGI Symbol;Acc:MGI:1891725]	0.02	-5.662755553	3.10E-105	2.59E-102	yes	down	3154.18	3489.47	2034.37	22.32	8.86	13.2	2892.673333	14.79333333
ENSMUSG00000022679	Mpv17l	Mpv17 transgene, kidney disease mutant-like [Source:MGI Symbol;Acc:MGI:2135951]	0.034	-4.872480008	1.35E-104	1.08E-101	yes	down	140.72	146.31	74.3	0.94	1.16	1.76	120.4433333	1.286666667
ENSMUSG00000076441	Ass1	argininosuccinate synthetase 1 [Source:MGI Symbol;Acc:MGI:88090]	0.068	-3.870812939	4.01E-104	3.07E-101	yes	down	579.91	540.85	289.8	7.96	7.29	6.44	470.1866667	7.23
ENSMUSG00000049152	Ugt3a2	UDP glycosyltransferases 3 family, polypeptide A2 [Source:MGI Symbol;Acc:MGI:2145969]	0.012	-6.393773042	5.93E-104	4.36E-101	yes	down	234.95	186.09	108.66	0.74	0.58	0.19	176.5666667	0.503333333
ENSMUSG00000029311	Hsd17b11	hydroxysteroid (17-beta) dehydrogenase 11 [Source:MGI Symbol;Acc:MGI:2149821]	0.051	-4.27967728	8.24E-100	5.83E-97	yes	down	153.35	128.56	70.92	1.4	1.48	1.13	117.61	1.336666667
ENSMUSG00000022235	Cmbl	carboxymethylenebutenolidase-like (Pseudomonas) [Source:MGI Symbol;Acc:MGI:1916824]	0.056	-4.159360176	6.16E-95	4.04E-92	yes	down	146.61	129.58	84.22	1.78	1.56	1.06	120.1366667	1.466666667
ENSMUSG00000033715	Akr1c14	aldo-keto reductase family 1, member C14 [Source:MGI Symbol;Acc:MGI:2145458]	0.016	-5.981908759	2.89E-89	1.72E-86	yes	down	41.78	37.75	22.13	0.27	0.14	0.1	33.88666667	0.17
ENSMUSG00000031938	4931406C07Rik	RIKEN cDNA 4931406C07 gene [Source:MGI Symbol;Acc:MGI:1918234]	0.083	-3.595457849	6.59E-88	3.67E-85	yes	down	243.74	215.63	157.39	4.28	3.59	3.52	205.5866667	3.796666667
ENSMUSG00000041052	Slc7a13	solute carrier family 7, (cationic amino acid transporter, y+ system) member 13 [Source:MGI Symbol;Acc:MGI:1921337]	0.005	-7.638021127	3.25E-84	1.71E-81	yes	down	116.64	115.63	54.43	0.1	0.07	0.15	95.56666667	0.106666667
MSTRG.1711		-	29.858	4.900022101	4.60E-83	2.35E-80	yes	up	0.95	1.33	0.59	5.28	5.52	4.71	0.956666667	5.17
MSTRG.11614		-	106.496	6.734648815	1.10E-81	5.45E-79	yes	up	0.73	0.27	0.44	13.62	15.99	7.08	0.48	12.23
MSTRG.8435		-	201.22	7.65263167	1.93E-81	9.34E-79	yes	up	0.19	0.09	0.24	7.66	12.68	5.36	0.173333333	8.566666667
ENSMUSG00000025479	Cyp2e1	cytochrome P450, family 2, subfamily e, polypeptide 1 [Source:MGI Symbol;Acc:MGI:88607]	0.025	-5.30112513	6.74E-81	3.18E-78	yes	down	422.62	498.39	221.27	2.46	1.49	2.18	380.76	2.043333333
MSTRG.20586		-	333.037	8.379540467	1.26E-80	5.78E-78	yes	up	6.88	8.34	20.65	277.71	819.39	294.42	11.95666667	463.84
ENSMUSG00000048612	Myof	myoferlin [Source:MGI Symbol;Acc:MGI:1919192]	13.864	3.793317678	1.16E-79	5.21E-77	yes	up	0.75	0.78	0.49	2.05	2.33	1.45	0.673333333	1.943333333
ENSMUSG00000030004	Nat8	N-acetyltransferase 8 (GCN5-related) [Source:MGI Symbol;Acc:MGI:1915646]	0.022	-5.497123949	2.92E-78	1.25E-75	yes	down	144.1	161.68	75.5	0.84	0.45	0.58	127.0933333	0.623333333
ENSMUSG00000031725	Ces1f	carboxylesterase 1F [Source:MGI Symbol;Acc:MGI:2142687]	0.006	-7.419426974	5.12E-77	2.14E-74	yes	down	234.8	206.62	126.5	0.32	0.06	0.37	189.3066667	0.25
ENSMUSG00000030781	Slc5a2	solute carrier family 5 (sodium/glucose cotransporter), member 2 [Source:MGI Symbol;Acc:MGI:2181411]	0.086	-3.542359242	6.65E-76	2.72E-73	yes	down	103.8	119.43	62.68	2.94	2.05	2.28	95.30333333	2.423333333
ENSMUSG00000025732	Fam195a	family with sequence similarity 195, member A [Source:MGI Symbol;Acc:MGI:1915491]	0.077	-3.707670799	1.73E-75	6.93E-73	yes	down	157.96	176.5	108.57	2.43	3.1	2.15	147.6766667	2.56
ENSMUSG00000061742	Slc22a12	solute carrier family 22 (organic anion/cation transporter), member 12 [Source:MGI Symbol;Acc:MGI:1195269]	0.034	-4.885589172	2.01E-75	7.87E-73	yes	down	448.18	472.24	253.16	2.06	1.15	2.71	391.1933333	1.973333333
ENSMUSG00000022040	Ephx2	epoxide hydrolase 2, cytoplasmic [Source:MGI Symbol;Acc:MGI:99500]	0.095	-3.389961493	2.57E-75	9.84E-73	yes	down	148.41	129.59	82.65	3.23	2.4	2.08	120.2166667	2.57
ENSMUSG00000035878	Hykk	hydroxylysine kinase 1 [Source:MGI Symbol;Acc:MGI:2443139]	0.057	-4.136695952	6.34E-75	2.38E-72	yes	down	31.19	27.84	19.28	0.35	0.28	0.34	26.10333333	0.323333333
ENSMUSG00000029811	Aoc1	amine oxidase, copper-containing 1 [Source:MGI Symbol;Acc:MGI:1923757]	52.87	5.724374028	7.84E-73	2.83E-70	yes	up	0.66	0.45	0.32	8.14	6.89	3.01	0.476666667	6.013333333
ENSMUSG00000000673	Haao	3-hydroxyanthranilate 3,4-dioxygenase [Source:MGI Symbol;Acc:MGI:1349444]	0.023	-5.444550457	1.72E-72	6.09E-70	yes	down	109.93	107.2	77.87	0.56	0.3	0.65	98.33333333	0.503333333
ENSMUSG00000045136	Tubb2b	tubulin, beta 2B class IIB [Source:MGI Symbol;Acc:MGI:1920960]	17.645	4.141150034	5.53E-72	1.92E-69	yes	up	1.39	1.44	0.77	5.87	4.44	3.85	1.2	4.72
ENSMUSG00000028571	Cyp2j13	cytochrome P450, family 2, subfamily j, polypeptide 13 [Source:MGI Symbol;Acc:MGI:2385197]	0.063	-3.988757285	8.00E-72	2.72E-69	yes	down	36.43	40.48	17.46	0.45	0.46	0.32	31.45666667	0.41
ENSMUSG00000037946	Fgd3	FYVE, RhoGEF and PH domain containing 3 [Source:MGI Symbol;Acc:MGI:1353657]	24.438	4.611027718	1.28E-71	4.27E-69	yes	up	0.48	0.69	0.39	2.61	4.21	2.19	0.52	3.003333333
ENSMUSG00000074194	Zfp791	zinc finger protein 791 [Source:MGI Symbol;Acc:MGI:3648473]	193.751	7.598056958	6.33E-71	2.08E-68	yes	up	1.78	0.77	1.06	22.27	68.1	40.83	1.203333333	43.73333333
MSTRG.5171		-	267.52	8.06350551	6.60E-69	2.09E-66	yes	up	3.91	0.81	1.99	89.22	135.37	90.84	2.236666667	105.1433333
ENSMUSG00000057103	Nat8f1	N-acetyltransferase 8 (GCN5-related) family member 1 [Source:MGI Symbol;Acc:MGI:1913366]	0.012	-6.385969318	7.04E-68	2.09E-65	yes	down	230.69	226.09	129.17	0.28	0.34	1.78	195.3166667	0.8
ENSMUSG00000033427	Upb1	ureidopropionase, beta [Source:MGI Symbol;Acc:MGI:2143535]	0.03	-5.042977066	1.12E-67	3.28E-65	yes	down	33.92	33.64	15.45	0.23	0.17	0.17	27.67	0.19
ENSMUSG00000020051	Pah	phenylalanine hydroxylase [Source:MGI Symbol;Acc:MGI:97473]	0.052	-4.255450439	8.30E-67	2.39E-64	yes	down	401.93	401.25	227.49	2.92	8.51	3.1	343.5566667	4.843333333
ENSMUSG00000027070	Lrp2	low density lipoprotein receptor-related protein 2 [Source:MGI Symbol;Acc:MGI:95794]	0.07	-3.8304964	1.12E-66	3.17E-64	yes	down	33.42	26.82	14.73	0.4	0.4	0.54	24.99	0.446666667
ENSMUSG00000029162	Khk	ketohexokinase [Source:MGI Symbol;Acc:MGI:1096353]	0.068	-3.887320171	2.08E-66	5.78E-64	yes	down	396.34	468.62	317.4	9.65	5.19	5.12	394.12	6.653333333
ENSMUSG00000053113	Socs3	suppressor of cytokine signaling 3 [Source:MGI Symbol;Acc:MGI:1201791]	45.106	5.495240145	3.95E-66	1.08E-63	yes	up	0.39	0.28	0.11	3	3.23	1.68	0.26	2.636666667
ENSMUSG00000040966	Slc22a2	solute carrier family 22 (organic cation transporter), member 2 [Source:MGI Symbol;Acc:MGI:1335072]	0.064	-3.9619838	6.03E-65	1.61E-62	yes	down	94.69	98.63	68.04	1.75	1.02	1.04	87.12	1.27
ENSMUSG00000026189	Pecr	peroxisomal trans-2-enoyl-CoA reductase [Source:MGI Symbol;Acc:MGI:2148199]	0.057	-4.141947889	1.63E-64	4.28E-62	yes	down	301.42	266.05	175.47	3.45	3.37	3.46	247.6466667	3.426666667
ENSMUSG00000024386	Proc	protein C [Source:MGI Symbol;Acc:MGI:97771]	0.041	-4.600403198	1.07E-62	2.73E-60	yes	down	118.15	98.51	77.3	1.4	0.73	0.56	97.98666667	0.896666667
MSTRG.6195		-	164.251	7.359757845	2.70E-62	6.72E-60	yes	up	1.36	0.94	1.16	50.45	49.75	32.75	1.153333333	44.31666667
ENSMUSG00000032047	Acat1	acetyl-Coenzyme A acetyltransferase 1 [Source:MGI Symbol;Acc:MGI:87870]	0.092	-3.434597294	7.06E-62	1.73E-59	yes	down	198.1	158.7	88.15	2.56	1.81	1.86	148.3166667	2.076666667
ENSMUSG00000040405	Havcr1	hepatitis A virus cellular receptor 1 [Source:MGI Symbol;Acc:MGI:2159680]	230.049	7.845794471	1.09E-61	2.65E-59	yes	up	0.37	0.34	0.12	21.49	17.91	4.57	0.276666667	14.65666667
ENSMUSG00000022853	Ehhadh	enoyl-Coenzyme A, hydratase/3-hydroxyacyl Coenzyme A dehydrogenase [Source:MGI Symbol;Acc:MGI:1277964]	0.044	-4.49148315	1.44E-61	3.39E-59	yes	down	98.61	88.74	37.61	0.8	0.62	0.68	74.98666667	0.7
ENSMUSG00000000154	Slc22a18	solute carrier family 22 (organic cation transporter), member 18 [Source:MGI Symbol;Acc:MGI:1336884]	0.041	-4.604973982	4.25E-61	9.90E-59	yes	down	261.69	311.41	223.03	3.23	1.82	2.83	265.3766667	2.626666667
ENSMUSG00000023013	Aqp2	aquaporin 2 [Source:MGI Symbol;Acc:MGI:1096865]	0.024	-5.398465259	6.30E-61	1.45E-58	yes	down	113.55	119.65	49.97	0.36	0.46	0.62	94.39	0.48
ENSMUSG00000020839	Tmigd1	transmembrane and immunoglobulin domain containing 1 [Source:MGI Symbol;Acc:MGI:1913851]	0.085	-3.555610962	2.42E-60	5.37E-58	yes	down	161.95	132.12	78.27	3.11	2.63	1.53	124.1133333	2.423333333
ENSMUSG00000074254	Cyp2a4	cytochrome P450, family 2, subfamily a, polypeptide 4 [Source:MGI Symbol;Acc:MGI:88596]	0.007	-7.151228552	2.24E-59	4.85E-57	yes	down	158.76	74.33	105.91	0.16	0.15	0.23	113	0.18
MSTRG.24332		-	29.174	4.86661699	4.29E-59	9.06E-57	yes	up	4.89	3.38	1.26	23.83	24.59	13.32	3.176666667	20.58
ENSMUSG00000052562	Slc22a30	solute carrier family 22, member 30 [Source:MGI Symbol;Acc:MGI:2442750]	0.005	-7.718938522	6.10E-59	1.27E-56	yes	down	70.35	60.83	33.59	0.02	0.12	0.05	54.92333333	0.063333333
MSTRG.6194		-	57.65	5.849259774	9.72E-59	2.01E-56	yes	up	23.11	18.68	15.38	402.27	407.78	247.59	19.05666667	352.5466667
ENSMUSG00000021236	Entpd5	ectonucleoside triphosphate diphosphohydrolase 5 [Source:MGI Symbol;Acc:MGI:1321385]	0.097	-3.372519321	3.52E-58	7.11E-56	yes	down	56.61	88.77	36.02	4.32	0.63	17.43	60.46666667	7.46
ENSMUSG00000027962	Vcam1	vascular cell adhesion molecule 1 [Source:MGI Symbol;Acc:MGI:98926]	18.387	4.20060186	3.52E-57	6.96E-55	yes	up	1.5	1.62	0.96	8.4	5.86	3.48	1.36	5.913333333
MSTRG.22467		-	83.565	6.384831797	4.20E-57	8.21E-55	yes	up	1.77	0.5	0.53	13.5	21.41	16.28	0.933333333	17.06333333
ENSMUSG00000075520	Malrd1	MAM and LDL receptor class A domain containing 1 [Source:MGI Symbol;Acc:MGI:1928271]	108.238	6.758056798	1.15E-56	2.21E-54	yes	up	3.05	1.7	0.27	29.53	45.14	21.24	1.673333333	31.97
ENSMUSG00000039062	Anpep	alanyl (membrane) aminopeptidase [Source:MGI Symbol;Acc:MGI:5000466]	0.076	-3.715365338	1.33E-56	2.52E-54	yes	down	120.14	120.37	76.87	1.25	0.84	1.69	105.7933333	1.26
ENSMUSG00000034871	Fam151a	family with sequence simliarity 151, member A [Source:MGI Symbol;Acc:MGI:2657115]	0.017	-5.917701484	2.09E-56	3.92E-54	yes	down	37.12	39.26	21.82	0.19	0.13	0	32.73333333	0.106666667
ENSMUSG00000019810	Fuca2	fucosidase, alpha-L- 2, plasma [Source:MGI Symbol;Acc:MGI:1914098]	0.098	-3.352605289	2.84E-56	5.27E-54	yes	down	351.22	299.37	160.67	7.17	5.11	3.51	270.42	5.263333333
MSTRG.20585		-	97.928	6.613654585	8.22E-56	1.51E-53	yes	up	374.64	351.4	257.25	1089.27	3135.29	1478.72	327.7633333	1901.093333
MSTRG.25976		-	58.333	5.866236178	1.10E-55	2.01E-53	yes	up	0.42	0.16	0.36	4.3	5.09	3.72	0.313333333	4.37
ENSMUSG00000079262	Slco1a6	solute carrier organic anion transporter family, member 1a6 [Source:MGI Symbol;Acc:MGI:1351906]	0.04	-4.648715811	1.22E-55	2.21E-53	yes	down	153.05	84.13	70.23	3.83	11.44	4.69	102.47	6.653333333
ENSMUSG00000002475	Abhd3	abhydrolase domain containing 3 [Source:MGI Symbol;Acc:MGI:2147183]	0.026	-5.264297533	1.63E-55	2.91E-53	yes	down	56.28	60.36	32.2	0.34	0.26	0.35	49.61333333	0.316666667
ENSMUSG00000109311	AI314278	expressed sequence AI314278 [Source:MGI Symbol;Acc:MGI:2141898]	0.079	-3.665172471	6.32E-55	1.12E-52	yes	down	58.56	49.34	33.78	0.73	1.85	1.19	47.22666667	1.256666667
ENSMUSG00000062908	Acadm	acyl-Coenzyme A dehydrogenase, medium chain [Source:MGI Symbol;Acc:MGI:87867]	0.096	-3.377694161	1.25E-54	2.16E-52	yes	down	278.73	248.26	120.42	5.08	4.32	3.92	215.8033333	4.44
ENSMUSG00000024866	Acy3	aspartoacylase (aminoacylase) 3 [Source:MGI Symbol;Acc:MGI:1918920]	0.019	-5.712383231	1.39E-54	2.38E-52	yes	down	1307.23	1354.86	761.81	3.77	3.14	6.66	1141.3	4.523333333
ENSMUSG00000025937	Lactb2	lactamase, beta 2 [Source:MGI Symbol;Acc:MGI:2442551]	0.083	-3.587080017	4.99E-54	8.27E-52	yes	down	184.09	148.07	77.34	2.56	1.46	1.88	136.5	1.966666667
ENSMUSG00000055137	Sugct	succinyl-CoA glutarate-CoA transferase [Source:MGI Symbol;Acc:MGI:1923221]	0.069	-3.850098275	8.71E-54	1.43E-51	yes	down	79.69	70.18	44.45	0.95	1.08	0.57	64.77333333	0.866666667
ENSMUSG00000038224	Serpinf2	serine (or cysteine) peptidase inhibitor, clade F, member 2 [Source:MGI Symbol;Acc:MGI:107173]	0.055	-4.19155901	1.65E-53	2.68E-51	yes	down	94.02	82.1	56.2	1.51	0.72	0.66	77.44	0.963333333
ENSMUSG00000006342	Susd2	sushi domain containing 2 [Source:MGI Symbol;Acc:MGI:1918983]	0.043	-4.541301707	1.73E-52	2.79E-50	yes	down	31.2	23.66	21.94	0.25	0.21	0.29	25.6	0.25
ENSMUSG00000005980	Dnase1	deoxyribonuclease I [Source:MGI Symbol;Acc:MGI:103157]	0.007	-7.176007098	2.09E-52	3.34E-50	yes	down	146.6	341.81	184.4	1.4	0.12	0.23	224.27	0.583333333
ENSMUSG00000030616	Sytl2	synaptotagmin-like 2 [Source:MGI Symbol;Acc:MGI:1933366]	15.813	3.983048651	2.40E-52	3.74E-50	yes	up	1.15	1.19	0.95	4.63	4.1	2.63	1.096666667	3.786666667
ENSMUSG00000021490	Slc34a1	solute carrier family 34 (sodium phosphate), member 1 [Source:MGI Symbol;Acc:MGI:1345284]	0.028	-5.159945988	2.66E-52	4.11E-50	yes	down	459.69	529.5	263.73	2.82	1.5	2.98	417.64	2.433333333
ENSMUSG00000024803	Ankrd1	ankyrin repeat domain 1 (cardiac muscle) [Source:MGI Symbol;Acc:MGI:1097717]	31.144	4.960887309	8.93E-52	1.37E-49	yes	up	0.41	0.39	0.26	2.16	3.18	2.07	0.353333333	2.47
ENSMUSG00000023914	Mep1a	meprin 1 alpha [Source:MGI Symbol;Acc:MGI:96963]	0.071	-3.817793739	4.10E-51	6.24E-49	yes	down	158.78	144.81	60.9	2.26	1.61	1.62	121.4966667	1.83
MSTRG.8899		-	40.951	5.355810697	1.36E-50	2.02E-48	yes	up	0.35	0.27	0.23	3.28	4	1.13	0.283333333	2.803333333
ENSMUSG00000028989	Angptl7	angiopoietin-like 7 [Source:MGI Symbol;Acc:MGI:3605801]	0.004	-7.80291858	2.96E-50	4.28E-48	yes	down	62.51	57.58	28.7	0.05	0.07	0.03	49.59666667	0.05
ENSMUSG00000035910	Dcdc2a	doublecortin domain containing 2a [Source:MGI Symbol;Acc:MGI:2652818]	13.64	3.769733855	5.42E-50	7.79E-48	yes	up	3.2	2.11	1.22	9.05	5.5	3.95	2.176666667	6.166666667
ENSMUSG00000038085	Cnbd2	cyclic nucleotide binding domain containing 2 [Source:MGI Symbol;Acc:MGI:1918123]	56.785	5.82742611	6.01E-50	8.57E-48	yes	up	6.83	15.42	16.94	32.04	35	44.34	13.06333333	37.12666667
ENSMUSG00000021186	Fbln5	fibulin 5 [Source:MGI Symbol;Acc:MGI:1346091]	0.09	-3.474213107	4.15E-49	5.83E-47	yes	down	24.5	28.3	14.31	0.41	0.38	0.24	22.37	0.343333333
ENSMUSG00000034875	Nudt19	nudix (nucleoside diphosphate linked moiety X)-type motif 19 [Source:MGI Symbol;Acc:MGI:94203]	0.083	-3.596312581	8.51E-49	1.18E-46	yes	down	490.6	315.75	216.71	8.09	9.63	3.98	341.02	7.233333333
ENSMUSG00000045763	Basp1	brain abundant, membrane attached signal protein 1 [Source:MGI Symbol;Acc:MGI:1917600]	50.625	5.661770159	1.28E-48	1.76E-46	yes	up	0.25	0.37	0.22	2.71	5.16	2.1	0.28	3.323333333
ENSMUSG00000038497	Tmco3	transmembrane and coiled-coil domains 3 [Source:MGI Symbol;Acc:MGI:2444946]	0.073	-3.775650138	1.88E-48	2.57E-46	yes	down	49.29	44.89	30.95	0.52	0.66	0.51	41.71	0.563333333
ENSMUSG00000002204	Napsa	napsin A aspartic peptidase [Source:MGI Symbol;Acc:MGI:109365]	0.085	-3.54805936	1.90E-48	2.57E-46	yes	down	670.35	560.4	321.53	13.53	8.07	9.08	517.4266667	10.22666667
ENSMUSG00000037542	Aldh8a1	aldehyde dehydrogenase 8 family, member A1 [Source:MGI Symbol;Acc:MGI:2653900]	0.078	-3.678538822	4.55E-48	6.06E-46	yes	down	53.6	72.4	52.92	1.12	1.12	1.04	59.64	1.093333333
ENSMUSG00000029304	Spp1	secreted phosphoprotein 1 [Source:MGI Symbol;Acc:MGI:98389]	29.016	4.858791609	1.05E-47	1.38E-45	yes	up	181	92.04	50.43	860.48	537.02	595.83	107.8233333	664.4433333
ENSMUSG00000022244	Amacr	alpha-methylacyl-CoA racemase [Source:MGI Symbol;Acc:MGI:1098273]	0.051	-4.285333596	1.19E-47	1.56E-45	yes	down	124.98	99.53	66.67	1.18	0.8	0.73	97.06	0.903333333
MSTRG.13908		-	59.863	5.903584191	1.21E-47	1.57E-45	yes	up	0.42	0.41	0.17	3.08	8.18	2.31	0.333333333	4.523333333
ENSMUSG00000040663	Clcf1	cardiotrophin-like cytokine factor 1 [Source:MGI Symbol;Acc:MGI:1930088]	13.251	3.728074502	6.64E-47	8.41E-45	yes	up	0.83	1.22	0.9	4.16	3.32	2.36	0.983333333	3.28
ENSMUSG00000019278	Dpep1	dipeptidase 1 (renal) [Source:MGI Symbol;Acc:MGI:94917]	0.017	-5.878201655	7.24E-47	9.12E-45	yes	down	28.24	29.66	15.13	0.14	0.03	0.09	24.34333333	0.086666667
ENSMUSG00000079523	Tmsb10	thymosin, beta 10 [Source:MGI Symbol;Acc:MGI:109146]	11.668	3.54453451	1.09E-46	1.35E-44	yes	up	115.06	146.34	70.86	349.68	379.33	176.98	110.7533333	301.9966667
ENSMUSG00000020120	Plek	pleckstrin [Source:MGI Symbol;Acc:MGI:1860485]	84.847	6.406788588	1.67E-46	2.04E-44	yes	up	0.07	0.1	0.08	2	2.44	0.69	0.083333333	1.71
ENSMUSG00000033533	Acsm1	acyl-CoA synthetase medium-chain family member 1 [Source:MGI Symbol;Acc:MGI:2152200]	0.093	-3.419441491	3.04E-46	3.71E-44	yes	down	43.31	53.06	27.32	0.86	0.98	0.75	41.23	0.863333333
ENSMUSG00000038286	Bphl	biphenyl hydrolase-like (serine hydrolase, breast epithelial mucin-associated antigen) [Source:MGI Symbol;Acc:MGI:1915271]	0.079	-3.660591575	4.40E-46	5.28E-44	yes	down	184.6	189.73	139.78	1.91	3.08	2.82	171.37	2.603333333
MSTRG.3948		-	20.376	4.348781674	6.18E-46	7.37E-44	yes	up	1.07	0.75	0.91	3.62	6.15	2.94	0.91	4.236666667
ENSMUSG00000066097	Cyp2j11	cytochrome P450, family 2, subfamily j, polypeptide 11 [Source:MGI Symbol;Acc:MGI:2140224]	0.019	-5.744136818	6.41E-46	7.61E-44	yes	down	45.12	29.15	17.05	0.05	0.16	0.23	30.44	0.146666667
ENSMUSG00000003809	Gcdh	glutaryl-Coenzyme A dehydrogenase [Source:MGI Symbol;Acc:MGI:104541]	0.081	-3.631560605	8.87E-46	1.05E-43	yes	down	96.71	84.31	49.46	1.64	0.97	1.27	76.82666667	1.293333333
ENSMUSG00000022952	Runx1	runt related transcription factor 1 [Source:MGI Symbol;Acc:MGI:99852]	54.71	5.773720665	9.68E-46	1.13E-43	yes	up	0.08	0.07	0.03	0.94	1.56	0.49	0.06	0.996666667
ENSMUSG00000032114	Slc37a4	solute carrier family 37 (glucose-6-phosphate transporter), member 4 [Source:MGI Symbol;Acc:MGI:1316650]	0.079	-3.655027802	4.46E-45	5.09E-43	yes	down	38.54	41.44	19.16	0.77	0.55	0.38	33.04666667	0.566666667
MSTRG.11759		-	28.415	4.828593515	6.10E-45	6.93E-43	yes	up	1.39	0.72	0.97	4.1	8.89	4.62	1.026666667	5.87
ENSMUSG00000001025	S100a6	S100 calcium binding protein A6 (calcyclin) [Source:MGI Symbol;Acc:MGI:1339467]	11.163	3.480705041	6.15E-45	6.94E-43	yes	up	9.86	17.1	10.98	49.86	39.14	29.99	12.64666667	39.66333333
ENSMUSG00000030359	Pzp	pregnancy zone protein [Source:MGI Symbol;Acc:MGI:87854]	0.019	-5.752075809	3.94E-44	4.29E-42	yes	down	110.82	66.21	53.48	0.19	0.1	0.02	76.83666667	0.103333333
ENSMUSG00000023044	Csad	cysteine sulfinic acid decarboxylase [Source:MGI Symbol;Acc:MGI:2180098]	0.093	-3.426227566	3.97E-44	4.29E-42	yes	down	49.2	41.34	23.69	0.62	0.78	0.83	38.07666667	0.743333333
ENSMUSG00000027605	Acss2	acyl-CoA synthetase short-chain family member 2 [Source:MGI Symbol;Acc:MGI:1890410]	0.097	-3.363088756	6.47E-44	6.92E-42	yes	down	37.24	25.7	17.65	0.82	0.73	0.37	26.86333333	0.64
ENSMUSG00000038587	Akap12	A kinase (PRKA) anchor protein (gravin) 12 [Source:MGI Symbol;Acc:MGI:1932576]	16.58	4.051329423	2.80E-43	2.95E-41	yes	up	0.88	0.73	0.4	3.12	3.25	1.21	0.67	2.526666667
ENSMUSG00000110720	AC153954.1	-	38.126	5.252687392	5.19E-43	5.42E-41	yes	up	0.33	0.25	0.26	6.58	5.1	1.68	0.28	4.453333333
ENSMUSG00000090817	Gm4450	predicted gene 4450 [Source:MGI Symbol;Acc:MGI:3782634]	0.075	-3.736391878	7.13E-43	7.41E-41	yes	down	280.86	270.12	193.49	3.6	6.48	3.37	248.1566667	4.483333333
ENSMUSG00000020062	Slc5a8	solute carrier family 5 (iodide transporter), member 8 [Source:MGI Symbol;Acc:MGI:2384916]	0.027	-5.207845969	2.94E-42	2.99E-40	yes	down	112.13	105.53	52.42	0.17	0.24	0.15	90.02666667	0.186666667
ENSMUSG00000042102	Dmgdh	dimethylglycine dehydrogenase precursor [Source:MGI Symbol;Acc:MGI:1921379]	0.047	-4.401497364	6.60E-42	6.67E-40	yes	down	19.98	16.44	8.75	0.2	0.12	0.14	15.05666667	0.153333333
ENSMUSG00000036764	Dnajc12	DnaJ heat shock protein family (Hsp40) member C12 [Source:MGI Symbol;Acc:MGI:1353428]	0.057	-4.137247895	2.51E-41	2.51E-39	yes	down	92.58	53.01	38.5	0.44	1.63	0.18	61.36333333	0.75
ENSMUSG00000051439	Cd14	CD14 antigen [Source:MGI Symbol;Acc:MGI:88318]	19.146	4.258984859	4.07E-41	4.03E-39	yes	up	3.76	4.49	1.79	20.47	16.54	6.89	3.346666667	14.63333333
ENSMUSG00000024501	Dpysl3	dihydropyrimidinase-like 3 [Source:MGI Symbol;Acc:MGI:1349762]	13.209	3.723501759	9.09E-41	8.80E-39	yes	up	0.7	0.46	0.46	1.94	2.1	1.19	0.54	1.743333333
ENSMUSG00000029161	Cgref1	cell growth regulator with EF hand domain 1 [Source:MGI Symbol;Acc:MGI:1915817]	0.088	-3.514547037	1.37E-40	1.32E-38	yes	down	121.05	119.67	85.6	3.05	1.56	1.82	108.7733333	2.143333333
ENSMUSG00000078650	G6pc	glucose-6-phosphatase, catalytic [Source:MGI Symbol;Acc:MGI:95607]	0.018	-5.789806563	4.34E-40	4.05E-38	yes	down	60.69	37.1	22.38	0.19	0.04	0.22	40.05666667	0.15
ENSMUSG00000076431	Sox4	SRY (sex determining region Y)-box 4 [Source:MGI Symbol;Acc:MGI:98366]	10.616	3.408194908	6.53E-40	5.98E-38	yes	up	0.51	0.41	0.3	0.88	1.31	0.76	0.406666667	0.983333333
ENSMUSG00000031168	Ebp	phenylalkylamine Ca2+ antagonist (emopamil) binding protein [Source:MGI Symbol;Acc:MGI:107822]	0.094	-3.417073544	7.94E-40	7.22E-38	yes	down	40.26	37.39	26.47	1	0.78	0.44	34.70666667	0.74
MSTRG.5170		-	57.723	5.851070689	1.85E-39	1.66E-37	yes	up	0.1	0.92	0.31	1.49	2.72	2.39	0.443333333	2.2
ENSMUSG00000079495	Nat8f6	N-acetyltransferase 8 (GCN5-related) family member 6 [Source:MGI Symbol;Acc:MGI:3779382]	0.015	-6.068099275	1.96E-39	1.75E-37	yes	down	54.95	52.26	24.67	0.17	0	0.19	43.96	0.12
ENSMUSG00000033610	Pank1	pantothenate kinase 1 [Source:MGI Symbol;Acc:MGI:1922985]	0.057	-4.142455079	1.99E-39	1.76E-37	yes	down	59.49	47.73	17.9	0.36	0.29	0.37	41.70666667	0.34
ENSMUSG00000022366	Slc22a22	solute carrier family 22 (organic cation transporter), member 22 [Source:MGI Symbol;Acc:MGI:2446114]	0.022	-5.477647422	2.91E-39	2.57E-37	yes	down	35.35	24.6	18.09	0.1	0.05	0.22	26.01333333	0.123333333
ENSMUSG00000052520	Cyp2j5	cytochrome P450, family 2, subfamily j, polypeptide 5 [Source:MGI Symbol;Acc:MGI:1270149]	0.093	-3.425972179	3.21E-39	2.81E-37	yes	down	272.83	201.67	103.8	4.14	5.23	2.04	192.7666667	3.803333333
ENSMUSG00000029188	Slc34a2	solute carrier family 34 (sodium phosphate), member 2 [Source:MGI Symbol;Acc:MGI:1342284]	37.487	5.228335363	7.19E-39	6.27E-37	yes	up	0.15	0.17	0.06	1.68	1.07	0.57	0.126666667	1.106666667
ENSMUSG00000040322	Slc25a24	solute carrier family 25 (mitochondrial carrier, phosphate carrier), member 24 [Source:MGI Symbol;Acc:MGI:1917160]	17.489	4.128352565	7.43E-39	6.44E-37	yes	up	0.29	0.42	0.27	1.73	1.54	0.77	0.326666667	1.346666667
ENSMUSG00000074715	Ccl28	chemokine (C-C motif) ligand 28 [Source:MGI Symbol;Acc:MGI:1861731]	0.016	-5.936002036	3.45E-38	2.90E-36	yes	down	32.26	18.71	8.79	0.04	0.07	0.09	19.92	0.066666667
ENSMUSG00000020681	Ace	angiotensin I converting enzyme (peptidyl-dipeptidase A) 1 [Source:MGI Symbol;Acc:MGI:87874]	0.08	-3.647903375	3.64E-38	3.03E-36	yes	down	18.59	21.26	9.3	0.33	0.16	0.23	16.38333333	0.24
ENSMUSG00000029622	Arpc1b	actin related protein 2/3 complex, subunit 1B [Source:MGI Symbol;Acc:MGI:1343142]	10.61	3.407354644	1.69E-37	1.38E-35	yes	up	10.28	10.89	5.24	14.34	20.89	7.12	8.803333333	14.11666667
ENSMUSG00000018008	Cyth4	cytohesin 4 [Source:MGI Symbol;Acc:MGI:2441702]	12.799	3.677973129	2.30E-37	1.87E-35	yes	up	1.09	1.51	0.53	3.25	4.14	1.84	1.043333333	3.076666667
ENSMUSG00000058952	Cfi	complement component factor i [Source:MGI Symbol;Acc:MGI:105937]	35.444	5.147484116	2.59E-37	2.10E-35	yes	up	0.26	0.42	0.07	1.36	2.13	1.21	0.25	1.566666667
MSTRG.7570		-	21.14	4.401914816	3.47E-37	2.79E-35	yes	up	0.22	0.1	0.15	0.8	0.98	0.51	0.156666667	0.763333333
ENSMUSG00000089929	Bcl2a1b	B cell leukemia/lymphoma 2 related protein A1b [Source:MGI Symbol;Acc:MGI:1278326]	72.321	6.176350887	4.40E-37	3.50E-35	yes	up	0.15	0.76	0.23	7.49	8.08	3.71	0.38	6.426666667
ENSMUSG00000110537	Gm4316	predicted gene 4316 [Source:MGI Symbol;Acc:MGI:3782497]	29.334	4.874504471	8.65E-37	6.83E-35	yes	up	1.93	0.91	1.32	8.21	6.59	5.84	1.386666667	6.88
ENSMUSG00000027870	Hao2	hydroxyacid oxidase 2 [Source:MGI Symbol;Acc:MGI:96012]	0.097	-3.372722003	1.02E-36	7.97E-35	yes	down	162.03	94.94	88.85	2.56	2.31	2.49	115.2733333	2.453333333
ENSMUSG00000067144	Slc22a7	solute carrier family 22 (organic anion transporter), member 7 [Source:MGI Symbol;Acc:MGI:1859559]	0.001	-9.429757169	1.15E-36	8.92E-35	yes	down	115.5	110.87	58.91	0.05	0	0.05	95.09333333	0.033333333
ENSMUSG00000003617	Cp	ceruloplasmin [Source:MGI Symbol;Acc:MGI:88476]	16.438	4.038986226	2.14E-36	1.64E-34	yes	up	2.18	4.16	2.79	15.3	20.98	10.67	3.043333333	15.65
MSTRG.11675		-	13.464	3.751053362	2.45E-36	1.87E-34	yes	up	0.53	0.41	0.48	2.01	1.4	1.11	0.473333333	1.506666667
ENSMUSG00000097913	Gm26837	predicted gene, 26837 [Source:MGI Symbol;Acc:MGI:5477331]	59.931	5.905223692	4.77E-36	3.58E-34	yes	up	0.26	0.18	0.32	2.32	7.02	2.01	0.253333333	3.783333333
ENSMUSG00000024694	Keg1	kidney expressed gene 1 [Source:MGI Symbol;Acc:MGI:1928492]	0.086	-3.539351804	6.64E-36	4.94E-34	yes	down	551.46	707.92	258.62	8.46	9.11	10.15	506	9.24
ENSMUSG00000021838	Samd4	sterile alpha motif domain containing 4 [Source:MGI Symbol;Acc:MGI:1921730]	15.501	3.954276468	1.19E-35	8.72E-34	yes	up	1.79	1.43	0.68	5.04	2.14	13.96	1.3	7.046666667
ENSMUSG00000016194	Hsd11b1	hydroxysteroid 11-beta dehydrogenase 1 [Source:MGI Symbol;Acc:MGI:103562]	0.055	-4.185509932	2.04E-35	1.47E-33	yes	down	167.95	219.82	69.28	2.32	1.2	1.47	152.35	1.663333333
ENSMUSG00000056973	Ces1d	carboxylesterase 1D [Source:MGI Symbol;Acc:MGI:2148202]	0.043	-4.530978308	2.36E-35	1.69E-33	yes	down	45.23	54.48	15.17	0.61	0.35	0.25	38.29333333	0.403333333
ENSMUSG00000006638	Abhd1	abhydrolase domain containing 1 [Source:MGI Symbol;Acc:MGI:1931013]	0.05	-4.320417738	2.56E-35	1.81E-33	yes	down	66.85	68.89	23.52	0.78	0.53	0.38	53.08666667	0.563333333
ENSMUSG00000022346	Myc	myelocytomatosis oncogene [Source:MGI Symbol;Acc:MGI:97250]	12.638	3.659696695	4.62E-35	3.23E-33	yes	up	0.9	0.72	0.56	2.24	2.59	1.15	0.726666667	1.993333333
ENSMUSG00000035186	Ubd	ubiquitin D [Source:MGI Symbol;Acc:MGI:1344410]	79.694	6.316407698	9.29E-35	6.47E-33	yes	up	0.54	0.44	0.14	10.59	7.23	2.73	0.373333333	6.85
ENSMUSG00000047281	Sfn	stratifin [Source:MGI Symbol;Acc:MGI:1891831]	26.012	4.701092311	9.76E-35	6.77E-33	yes	up	0.35	0.26	0.17	1.67	1.6	1.24	0.26	1.503333333
ENSMUSG00000010307	Tmem86a	transmembrane protein 86A [Source:MGI Symbol;Acc:MGI:1915143]	0.071	-3.81095383	1.60E-34	1.10E-32	yes	down	21.97	17.02	14.4	0.25	0.37	0.26	17.79666667	0.293333333
ENSMUSG00000058488	Kl	klotho [Source:MGI Symbol;Acc:MGI:1101771]	0.067	-3.903892228	1.85E-34	1.25E-32	yes	down	53.51	46.13	31.02	0.41	0.57	0.83	43.55333333	0.603333333
ENSMUSG00000079494	Nat8f5	N-acetyltransferase 8 (GCN5-related) family member 5 [Source:MGI Symbol;Acc:MGI:1916299]	0.023	-5.465952278	2.26E-34	1.52E-32	yes	down	49.97	71.41	26.48	0.29	0.23	0.22	49.28666667	0.246666667
ENSMUSG00000037348	Paqr7	progestin and adipoQ receptor family member VII [Source:MGI Symbol;Acc:MGI:1919154]	0.015	-6.098904873	2.30E-34	1.54E-32	yes	down	32.35	21.27	10.72	0.04	0.1	0.01	21.44666667	0.05
ENSMUSG00000022372	Sla	src-like adaptor [Source:MGI Symbol;Acc:MGI:104295]	86.907	6.441397206	3.06E-34	2.01E-32	yes	up	0.06	0.08	0.05	1.92	1.35	0.61	0.063333333	1.293333333
ENSMUSG00000057228	Aadat	aminoadipate aminotransferase [Source:MGI Symbol;Acc:MGI:1345167]	0.045	-4.470554598	3.64E-34	2.38E-32	yes	down	69.87	64.69	64.47	0.91	0.71	1.54	66.34333333	1.053333333
ENSMUSG00000076609	Igkc	immunoglobulin kappa constant [Source:MGI Symbol;Acc:MGI:96495]	0.01	-6.705384667	4.50E-34	2.94E-32	yes	down	647.29	700.34	106.47	1.03	1.63	0.36	484.7	1.006666667
MSTRG.8971		-	22.341	4.481616464	4.74E-34	3.08E-32	yes	up	1.52	0.76	1.21	5.38	6.14	6.32	1.163333333	5.946666667
ENSMUSG00000058914	C1qtnf3	C1q and tumor necrosis factor related protein 3 [Source:MGI Symbol;Acc:MGI:1932136]	0.019	-5.685172896	6.96E-34	4.47E-32	yes	down	21.97	16.15	10.56	0.12	0	0.09	16.22666667	0.07
ENSMUSG00000028527	Ak4	adenylate kinase 4 [Source:MGI Symbol;Acc:MGI:87979]	0.068	-3.881048432	1.29E-33	8.22E-32	yes	down	55.7	47.92	32.24	0.3	0.82	0.88	45.28666667	0.666666667
ENSMUSG00000039519	Cyp7b1	cytochrome P450, family 7, subfamily b, polypeptide 1 [Source:MGI Symbol;Acc:MGI:104978]	0.033	-4.920985716	1.42E-33	9.01E-32	yes	down	27.87	26.76	12.13	0.31	0.25	1.17	22.25333333	0.576666667
ENSMUSG00000023571	C1qtnf12	C1q and tumor necrosis factor related 12 [Source:MGI Symbol;Acc:MGI:1914639]	0.098	-3.345791694	2.12E-33	1.33E-31	yes	down	68.43	84.02	53.59	1.68	2.16	2.18	68.68	2.006666667
ENSMUSG00000026602	Nphs2	nephrosis 2, podocin [Source:MGI Symbol;Acc:MGI:2157018]	0.023	-5.471165217	2.47E-33	1.55E-31	yes	down	21.16	16.75	6.51	0.12	0.06	0.04	14.80666667	0.073333333
ENSMUSG00000015401	Tmem27	transmembrane protein 27 [Source:MGI Symbol;Acc:MGI:1926234]	0.072	-3.786782434	2.90E-33	1.81E-31	yes	down	1071.29	860.45	334.75	16.09	14.42	6.35	755.4966667	12.28666667
ENSMUSG00000029484	Anxa3	annexin A3 [Source:MGI Symbol;Acc:MGI:1201378]	16.802	4.070603254	3.62E-33	2.25E-31	yes	up	2.83	2.29	3.91	18.16	16.97	5.85	3.01	13.66
ENSMUSG00000042129	Rassf4	Ras association (RalGDS/AF-6) domain family member 4 [Source:MGI Symbol;Acc:MGI:2386853]	12.886	3.687773119	4.30E-33	2.66E-31	yes	up	0.18	0.23	0.1	0.58	0.61	0.3	0.17	0.496666667
ENSMUSG00000031294	D630029K05Rik	RIKEN cDNA D630029K05 gene [Source:MGI Symbol;Acc:MGI:2143561]	0.027	-5.216561449	5.45E-33	3.35E-31	yes	down	40.18	25.97	15.95	0.13	0.11	0.55	27.36666667	0.263333333
ENSMUSG00000046688	Tifa	TRAF-interacting protein with forkhead-associated domain [Source:MGI Symbol;Acc:MGI:2182965]	14.684	3.876130717	5.79E-33	3.53E-31	yes	up	0.61	0.83	1.05	2.91	1.92	2.13	0.83	2.32
ENSMUSG00000005087	Cd44	CD44 antigen [Source:MGI Symbol;Acc:MGI:88338]	25.725	4.68511961	8.88E-33	5.39E-31	yes	up	0.11	0.21	0.13	1.33	0.82	0.58	0.15	0.91
ENSMUSG00000023120	Gm853	predicted gene 853 [Source:MGI Symbol;Acc:MGI:2685699]	0.018	-5.785658562	1.24E-32	7.41E-31	yes	down	56.61	63.51	78.15	0.12	0.04	0.08	66.09	0.08
ENSMUSG00000022831	Hcls1	hematopoietic cell specific Lyn substrate 1 [Source:MGI Symbol;Acc:MGI:104568]	27.819	4.798018006	1.32E-32	7.85E-31	yes	up	0.51	0.94	0.27	3.88	5.51	1.66	0.573333333	3.683333333
ENSMUSG00000056666	Retsat	retinol saturase (all trans retinol 13,14 reductase) [Source:MGI Symbol;Acc:MGI:1914692]	0.064	-3.971916049	1.48E-32	8.76E-31	yes	down	53.6	38.59	26.28	0.52	0.38	0.15	39.49	0.35
ENSMUSG00000018459	Slc13a3	solute carrier family 13 (sodium-dependent dicarboxylate transporter), member 3 [Source:MGI Symbol;Acc:MGI:2149635]	0.032	-4.948164786	2.14E-32	1.26E-30	yes	down	101.35	101.77	54.65	0.48	0.31	0.91	85.92333333	0.566666667
ENSMUSG00000036330	Slc18a1	solute carrier family 18 (vesicular monoamine), member 1 [Source:MGI Symbol;Acc:MGI:106684]	0.042	-4.571575758	2.32E-32	1.36E-30	yes	down	8.79	9.08	5.02	0.09	0.09	0.03	7.63	0.07
ENSMUSG00000029499	Pxmp2	peroxisomal membrane protein 2 [Source:MGI Symbol;Acc:MGI:107487]	0.059	-4.080440482	2.46E-32	1.44E-30	yes	down	29.44	34.65	20.49	0.48	0.42	0.7	28.19333333	0.533333333
ENSMUSG00000024039	Cbs	cystathionine beta-synthase [Source:MGI Symbol;Acc:MGI:88285]	0.071	-3.815194242	2.47E-32	1.44E-30	yes	down	36.72	40.72	21.66	0.38	0.42	0.69	33.03333333	0.496666667
ENSMUSG00000029695	Aass	aminoadipate-semialdehyde synthase [Source:MGI Symbol;Acc:MGI:1353573]	0.082	-3.612387306	4.68E-32	2.67E-30	yes	down	93.48	100	50.61	1.77	0.78	1.32	81.36333333	1.29
ENSMUSG00000056162	Cndp1	carnosine dipeptidase 1 (metallopeptidase M20 family) [Source:MGI Symbol;Acc:MGI:2451097]	0.092	-3.43541849	4.70E-32	2.67E-30	yes	down	42.12	50.57	46.66	1.42	0.93	0.6	46.45	0.983333333
ENSMUSG00000035699	Slc51a	solute carrier family 51, alpha subunit [Source:MGI Symbol;Acc:MGI:2146634]	0.026	-5.280779401	4.94E-32	2.80E-30	yes	down	22.09	33.64	14.35	0.09	0.12	0.19	23.36	0.133333333
ENSMUSG00000020774	Aspa	aspartoacylase [Source:MGI Symbol;Acc:MGI:87914]	0.094	-3.418692052	4.97E-32	2.81E-30	yes	down	18.71	19.98	11.39	0.32	0.7	0.35	16.69333333	0.456666667
MSTRG.16689		-	37.315	5.221684692	6.65E-32	3.74E-30	yes	up	0.33	0.4	0.18	2.21	2.66	2.67	0.303333333	2.513333333
ENSMUSG00000023262	Acy1	aminoacylase 1 [Source:MGI Symbol;Acc:MGI:87913]	0.04	-4.627780045	1.39E-31	7.59E-30	yes	down	178.36	185.98	131.17	2.69	0.59	1.42	165.17	1.566666667
MSTRG.32259		-	494.612	8.95015393	1.39E-31	7.61E-30	yes	up	0.17	0	0.06	6.92	9.69	5.15	0.076666667	7.253333333
ENSMUSG00000021620	Acot12	acyl-CoA thioesterase 12 [Source:MGI Symbol;Acc:MGI:1921406]	0.089	-3.492987125	1.54E-31	8.39E-30	yes	down	27.36	31.98	15.64	0.68	0.37	0.17	24.99333333	0.406666667
ENSMUSG00000032854	Ugt8a	UDP galactosyltransferase 8A [Source:MGI Symbol;Acc:MGI:109522]	0.093	-3.430782907	1.70E-31	9.22E-30	yes	down	10.89	8.37	6.59	0.21	0.26	0.09	8.616666667	0.186666667
ENSMUSG00000044367	Slc16a13	solute carrier family 16 (monocarboxylic acid transporters), member 13 [Source:MGI Symbol;Acc:MGI:1916559]	0.087	-3.530843292	2.84E-31	1.53E-29	yes	down	21.28	24.28	10.74	0.24	0.49	0.32	18.76666667	0.35
ENSMUSG00000025059	Gk	glycerol kinase [Source:MGI Symbol;Acc:MGI:106594]	0.095	-3.390725107	2.91E-31	1.56E-29	yes	down	69.56	57.56	36.85	1.64	0.76	0.77	54.65666667	1.056666667
ENSMUSG00000098276	Mir6358	microRNA 6358 [Source:MGI Symbol;Acc:MGI:5531212]	166.193	7.376712523	3.10E-31	1.66E-29	yes	up	0	0.05	0.05	1.91	1.57	0.96	0.033333333	1.48
ENSMUSG00000058624	Gda	guanine deaminase [Source:MGI Symbol;Acc:MGI:95678]	13.693	3.775357943	3.15E-31	1.68E-29	yes	up	0.16	0.31	0.16	0.67	0.87	0.45	0.21	0.663333333
ENSMUSG00000064907	Gm25405	predicted gene, 25405 [Source:MGI Symbol;Acc:MGI:5455182]	44.667	5.481121471	7.30E-31	3.85E-29	yes	up	17.35	33.25	11.14	158.37	298.89	183.43	20.58	213.5633333
ENSMUSG00000003283	Hck	hemopoietic cell kinase [Source:MGI Symbol;Acc:MGI:96052]	24.704	4.626665041	1.43E-30	7.45E-29	yes	up	0.33	0.4	0.12	1.51	2.23	1.13	0.283333333	1.623333333
MSTRG.22468		-	57.57	5.847237457	1.56E-30	8.08E-29	yes	up	0.65	0.12	0.16	2.8	6.37	2.76	0.31	3.976666667
ENSMUSG00000078439	Smim24	small integral membrane protein 24 [Source:MGI Symbol;Acc:MGI:1919523]	0.072	-3.786153861	2.31E-30	1.19E-28	yes	down	116.88	102.95	49.6	2.24	0.92	1.04	89.81	1.4
ENSMUSG00000061947	Serpina10	serine (or cysteine) peptidase inhibitor, clade A (alpha-1 antiproteinase, antitrypsin), member 10 [Source:MGI Symbol;Acc:MGI:2667725]	36.094	5.173669291	2.54E-30	1.30E-28	yes	up	0.15	0.36	0.14	1.8	0.72	0.55	0.216666667	1.023333333
ENSMUSG00000113346	AC154266.1	-	10.618	3.408408734	3.42E-30	1.75E-28	yes	up	1.17	1.52	0.99	2.56	3.68	2.78	1.226666667	3.006666667
ENSMUSG00000074028	Slc22a13	solute carrier family 22 (organic cation transporter), member 13 [Source:MGI Symbol;Acc:MGI:2143107]	0.033	-4.912880657	5.12E-30	2.60E-28	yes	down	16.22	15.27	11.58	0.05	0.03	0.1	14.35666667	0.06
ENSMUSG00000027761	Aadac	arylacetamide deacetylase (esterase) [Source:MGI Symbol;Acc:MGI:1915008]	0.091	-3.451521163	5.73E-30	2.89E-28	yes	down	69.57	40.45	23.28	0.95	0.67	0.44	44.43333333	0.686666667
ENSMUSG00000033220	Rac2	RAS-related C3 botulinum substrate 2 [Source:MGI Symbol;Acc:MGI:97846]	33.126	5.049890311	1.71E-29	8.44E-28	yes	up	0.61	0.5	0.16	3.38	5.03	1.11	0.423333333	3.173333333
ENSMUSG00000071715	Ncf4	neutrophil cytosolic factor 4 [Source:MGI Symbol;Acc:MGI:109186]	39.704	5.31121559	2.48E-29	1.22E-27	yes	up	0.51	1.11	0.45	7.14	5.22	2.24	0.69	4.866666667
ENSMUSG00000026348	Acmsd	amino carboxymuconate semialdehyde decarboxylase [Source:MGI Symbol;Acc:MGI:2386323]	0.03	-5.054021157	2.81E-29	1.38E-27	yes	down	75.43	67.01	58.11	0.36	0.14	0.57	66.85	0.356666667
ENSMUSG00000021565	Slc6a19	solute carrier family 6 (neurotransmitter transporter), member 19 [Source:MGI Symbol;Acc:MGI:1921588]	0.033	-4.941700323	5.08E-29	2.45E-27	yes	down	9.47	7.09	4.5	0.1	0.05	0.01	7.02	0.053333333
ENSMUSG00000064372	mt-Tp	mitochondrially encoded tRNA proline [Source:MGI Symbol;Acc:MGI:102478]	258.715	8.015218803	6.36E-29	3.05E-27	yes	up	7.24	16.99	28.64	1134.09	1681.32	990.93	17.62333333	1268.78
ENSMUSG00000030972	Acsm5	acyl-CoA synthetase medium-chain family member 5 [Source:MGI Symbol;Acc:MGI:2444086]	0.078	-3.679492012	1.52E-28	7.19E-27	yes	down	44.44	38.18	44.44	1.17	0.47	0.72	42.35333333	0.786666667
ENSMUSG00000040659	Efhd2	EF hand domain containing 2 [Source:MGI Symbol;Acc:MGI:106504]	10.215	3.352586817	2.18E-28	1.02E-26	yes	up	4.14	4.62	2.26	10.27	12.11	3.84	3.673333333	8.74
ENSMUSG00000026295	Spp2	secreted phosphoprotein 2 [Source:MGI Symbol;Acc:MGI:1922646]	0.021	-5.548758729	2.36E-28	1.10E-26	yes	down	169.36	135.26	42.72	0.64	0.2	0.59	115.78	0.476666667
ENSMUSG00000000567	Sox9	SRY (sex determining region Y)-box 9 [Source:MGI Symbol;Acc:MGI:98371]	108.023	6.755192409	2.47E-28	1.15E-26	yes	up	0.01	0.02	0.05	0.89	0.55	0.52	0.026666667	0.653333333
MSTRG.24333		-	526.288	9.03970961	2.99E-28	1.38E-26	yes	up	0	0.02	0.04	6.28	2.67	1.16	0.02	3.37
MSTRG.12046		-	15.664	3.969342447	3.01E-28	1.39E-26	yes	up	0.99	0.76	0.77	2.52	5.34	1.54	0.84	3.133333333
ENSMUSG00000040883	Tmem205	transmembrane protein 205 [Source:MGI Symbol;Acc:MGI:3045495]	0.091	-3.454351129	1.01E-27	4.60E-26	yes	down	216.39	254.49	167.34	4.76	2.77	6.32	212.74	4.616666667
ENSMUSG00000028536	2610528J11Rik	RIKEN cDNA 2610528J11 gene [Source:MGI Symbol;Acc:MGI:1913701]	0.078	-3.674371114	1.13E-27	5.12E-26	yes	down	40.58	41.96	26.92	0.78	0.33	0.77	36.48666667	0.626666667
MSTRG.25668		-	26.588	4.73267779	1.15E-27	5.20E-26	yes	up	9.35	5.78	0.08	35.18	45.31	30.05	5.07	36.84666667
ENSMUSG00000002699	Lcp2	lymphocyte cytosolic protein 2 [Source:MGI Symbol;Acc:MGI:1321402]	27.505	4.781609381	1.33E-27	5.97E-26	yes	up	0.12	0.15	0.07	0.65	1.06	0.35	0.113333333	0.686666667
ENSMUSG00000064225	Paqr9	progestin and adipoQ receptor family member IX [Source:MGI Symbol;Acc:MGI:1922802]	0.051	-4.289123365	1.38E-27	6.16E-26	yes	down	3.54	3.18	1.59	0.05	0.04	0.01	2.77	0.033333333
ENSMUSG00000004951	Hspb1	heat shock protein 1 [Source:MGI Symbol;Acc:MGI:96240]	11.785	3.558915836	2.28E-27	1.01E-25	yes	up	12.03	13.63	8	46.85	34.02	13.25	11.22	31.37333333
ENSMUSG00000031517	Gpm6a	glycoprotein m6a [Source:MGI Symbol;Acc:MGI:107671]	0.073	-3.774740143	3.97E-27	1.74E-25	yes	down	20.9	14.08	7.19	0.32	0.2	0.14	14.05666667	0.22
ENSMUSG00000024313	Mep1b	meprin 1 beta [Source:MGI Symbol;Acc:MGI:96964]	0.006	-7.418891253	6.12E-27	2.63E-25	yes	down	25.72	17.34	14.63	0.04	0	0.03	19.23	0.023333333
MSTRG.29207		-	12.586	3.653789429	6.39E-27	2.73E-25	yes	up	8.96	7.59	7.03	5.42	11.29	4.68	7.86	7.13
ENSMUSG00000050777	Tmem37	transmembrane protein 37 [Source:MGI Symbol;Acc:MGI:2157899]	0.08	-3.651726231	6.78E-27	2.89E-25	yes	down	59.26	61.71	28.72	0.78	1.17	0.33	49.89666667	0.76
ENSMUSG00000109628	BC024386	cDNA sequence BC023486 [Source:MGI Symbol;Acc:MGI:2669313]	0.026	-5.239155401	7.01E-27	2.98E-25	yes	down	42.87	38.29	44.41	0.11	0.37	0.48	41.85666667	0.32
ENSMUSG00000021367	Edn1	endothelin 1 [Source:MGI Symbol;Acc:MGI:95283]	14.704	3.878130871	7.21E-27	3.05E-25	yes	up	0.29	0.38	0.21	1.15	0.94	0.79	0.293333333	0.96
ENSMUSG00000061825	Ces2c	carboxylesterase 2C [Source:MGI Symbol;Acc:MGI:2385905]	0.017	-5.869709961	8.77E-27	3.67E-25	yes	down	28.96	31.87	8.73	0.1	0.05	0.07	23.18666667	0.073333333
ENSMUSG00000049866	Arl4c	ADP-ribosylation factor-like 4C [Source:MGI Symbol;Acc:MGI:2445172]	11.952	3.579234564	1.18E-26	4.93E-25	yes	up	0.54	0.53	0.19	1.12	1.62	0.64	0.42	1.126666667
ENSMUSG00000049799	Lrrc19	leucine rich repeat containing 19 [Source:MGI Symbol;Acc:MGI:2140219]	0.05	-4.309979219	1.53E-26	6.33E-25	yes	down	23.72	21.64	8.44	0.29	0.08	0.17	17.93333333	0.18
ENSMUSG00000000739	Sult5a1	sulfotransferase family 5A, member 1 [Source:MGI Symbol;Acc:MGI:1931463]	31.4	4.972672444	1.72E-26	7.09E-25	yes	up	1.27	0.34	0.57	6.02	4.83	3.25	0.726666667	4.7
ENSMUSG00000042251	Pm20d1	peptidase M20 domain containing 1 [Source:MGI Symbol;Acc:MGI:2442939]	0.045	-4.484395615	1.78E-26	7.33E-25	yes	down	10.33	7.16	2.44	0.03	0.06	0.04	6.643333333	0.043333333
ENSMUSG00000024965	Fermt3	fermitin family member 3 [Source:MGI Symbol;Acc:MGI:2147790]	14.386	3.846563034	1.91E-26	7.87E-25	yes	up	0.57	0.58	0.32	1.74	2.49	0.76	0.49	1.663333333
ENSMUSG00000046352	Gjb2	gap junction protein, beta 2 [Source:MGI Symbol;Acc:MGI:95720]	0.097	-3.368788239	2.26E-26	9.19E-25	yes	down	13.21	10.04	7.35	0.28	0.16	0.22	10.2	0.22
ENSMUSG00000068086	Cyp2d9	cytochrome P450, family 2, subfamily d, polypeptide 9 [Source:MGI Symbol;Acc:MGI:88606]	0.024	-5.408124615	2.36E-26	9.56E-25	yes	down	27.18	19.39	10.66	0.19	0.02	0.08	19.07666667	0.096666667
ENSMUSG00000030707	Coro1a	coronin, actin binding protein 1A [Source:MGI Symbol;Acc:MGI:1345961]	13.385	3.742588001	2.48E-26	1.01E-24	yes	up	2.9	3.66	1.06	9.58	10.06	3.58	2.54	7.74
MSTRG.11670		-	12.363	3.627922433	2.75E-26	1.11E-24	yes	up	0.64	1.11	0.8	2.7	2.52	1.26	0.85	2.16
ENSMUSG00000024757	Slc22a19	solute carrier family 22 (organic anion transporter), member 19 [Source:MGI Symbol;Acc:MGI:2442751]	0.008	-6.950386724	3.13E-26	1.26E-24	yes	down	29.51	16.5	13.3	0.05	0.02	0.04	19.77	0.036666667
ENSMUSG00000002111	Spi1	spleen focus forming virus (SFFV) proviral integration oncogene [Source:MGI Symbol;Acc:MGI:98282]	23.196	4.535817617	4.21E-26	1.68E-24	yes	up	1.58	2.06	0.55	8.34	10.1	2.48	1.396666667	6.973333333
MSTRG.10283		-	17.94	4.165100557	5.65E-26	2.23E-24	yes	up	5.76	4.97	7.01	7.19	14.96	8.96	5.913333333	10.37
ENSMUSG00000042622	Maff	v-maf musculoaponeurotic fibrosarcoma oncogene family, protein F (avian) [Source:MGI Symbol;Acc:MGI:96910]	21.902	4.452976058	5.86E-26	2.31E-24	yes	up	0.42	1.14	0.2	3.09	2.78	2.31	0.586666667	2.726666667
ENSMUSG00000061780	Cfd	complement factor D (adipsin) [Source:MGI Symbol;Acc:MGI:87931]	77.688	6.279622111	6.02E-26	2.37E-24	yes	up	0.3	1.13	0.24	4.26	9.85	12.85	0.556666667	8.986666667
ENSMUSG00000073633	Fbxo36	F-box protein 36 [Source:MGI Symbol;Acc:MGI:1289192]	0.073	-3.783812194	8.31E-26	3.23E-24	yes	down	32.84	30.72	23.75	0.59	0.31	0.56	29.10333333	0.486666667
ENSMUSG00000042116	Vwa1	von Willebrand factor A domain containing 1 [Source:MGI Symbol;Acc:MGI:2179729]	0.051	-4.279296418	8.65E-26	3.36E-24	yes	down	6.05	6.13	5.49	0.04	0.1	0.07	5.89	0.07
ENSMUSG00000013584	Aldh1a2	aldehyde dehydrogenase family 1, subfamily A2 [Source:MGI Symbol;Acc:MGI:107928]	11.193	3.484491253	9.91E-26	3.83E-24	yes	up	0.66	0.68	0.3	1.17	2.02	0.96	0.546666667	1.383333333
ENSMUSG00000036083	Slc17a3	solute carrier family 17 (sodium phosphate), member 3 [Source:MGI Symbol;Acc:MGI:2389216]	0.07	-3.840446722	1.29E-25	4.96E-24	yes	down	70.79	76.95	32.87	1.12	0.6	1.1	60.20333333	0.94
ENSMUSG00000048644	Ctxn1	cortexin 1 [Source:MGI Symbol;Acc:MGI:88566]	13.848	3.791645127	1.49E-25	5.74E-24	yes	up	0.76	0.89	0.54	2.54	3.28	1.28	0.73	2.366666667
MSTRG.7569		-	13.724	3.77861789	1.85E-25	7.07E-24	yes	up	0.61	0.45	0.27	0.83	1.9	0.87	0.443333333	1.2
ENSMUSG00000026628	Atf3	activating transcription factor 3 [Source:MGI Symbol;Acc:MGI:109384]	20.979	4.390857732	1.94E-25	7.40E-24	yes	up	0.21	0.33	0.43	1.87	2.06	0.99	0.323333333	1.64
ENSMUSG00000028480	Glipr2	GLI pathogenesis-related 2 [Source:MGI Symbol;Acc:MGI:1917770]	15.406	3.94539328	2.11E-25	8.05E-24	yes	up	0.53	0.92	0.32	2.89	2.46	1.02	0.59	2.123333333
ENSMUSG00000035184	Fam124a	family with sequence similarity 124, member A [Source:MGI Symbol;Acc:MGI:3645930]	30.664	4.938460691	2.39E-25	9.05E-24	yes	up	0.13	0.07	0.03	1.15	1.03	1.24	0.076666667	1.14
ENSMUSG00000024397	Aif1	allograft inflammatory factor 1 [Source:MGI Symbol;Acc:MGI:1343098]	30.133	4.913288575	2.64E-25	9.97E-24	yes	up	1.82	1.42	0.58	9.65	13.44	2.21	1.273333333	8.433333333
ENSMUSG00000067889	Sptbn2	spectrin beta, non-erythrocytic 2 [Source:MGI Symbol;Acc:MGI:1313261]	0.085	-3.562577103	5.71E-25	2.13E-23	yes	down	2.4	2.46	1.72	0.05	0.02	0.11	2.193333333	0.06
ENSMUSG00000054474	Thnsl2	threonine synthase-like 2 (bacterial) [Source:MGI Symbol;Acc:MGI:3041254]	0.083	-3.582505312	7.19E-25	2.67E-23	yes	down	50.71	74.28	30.84	0.95	0.57	1.04	51.94333333	0.853333333
ENSMUSG00000061959	Ces1e	carboxylesterase 1E [Source:MGI Symbol;Acc:MGI:95432]	0.011	-6.476974273	8.57E-25	3.15E-23	yes	down	15.52	14.59	10.71	0.02	0	0.09	13.60666667	0.036666667
ENSMUSG00000029193	Cckar	cholecystokinin A receptor [Source:MGI Symbol;Acc:MGI:99478]	0.038	-4.716399896	1.04E-24	3.81E-23	yes	down	8.56	9.03	3.92	0.01	0.09	0.06	7.17	0.053333333
ENSMUSG00000020911	Krt19	keratin 19 [Source:MGI Symbol;Acc:MGI:96693]	22.415	4.486367649	1.48E-24	5.33E-23	yes	up	0.58	1.56	0.46	5.45	2.63	2.33	0.866666667	3.47
ENSMUSG00000056515	Rab31	RAB31, member RAS oncogene family [Source:MGI Symbol;Acc:MGI:1914603]	10.357	3.372575838	1.52E-24	5.45E-23	yes	up	0.91	1.09	0.57	2.07	3.21	0.96	0.856666667	2.08
ENSMUSG00000069516	Lyz2	lysozyme 2 [Source:MGI Symbol;Acc:MGI:96897]	15.776	3.979693195	1.67E-24	5.99E-23	yes	up	4.68	5.4	1.37	15.9	18.77	5.8	3.816666667	13.49
ENSMUSG00000021207	Akr1c21	aldo-keto reductase family 1, member C21 [Source:MGI Symbol;Acc:MGI:1924587]	0.044	-4.505125707	1.94E-24	6.92E-23	yes	down	671.14	474.28	345.79	3.73	2.4	7.23	497.07	4.453333333
ENSMUSG00000031891	Hsd11b2	hydroxysteroid 11-beta dehydrogenase 2 [Source:MGI Symbol;Acc:MGI:104720]	0.04	-4.652570703	2.06E-24	7.36E-23	yes	down	66.62	100.9	49.39	1.25	0.24	0.62	72.30333333	0.703333333
ENSMUSG00000027896	Slc16a4	solute carrier family 16 (monocarboxylic acid transporters), member 4 [Source:MGI Symbol;Acc:MGI:2385183]	0.044	-4.500021152	2.33E-24	8.27E-23	yes	down	45.41	32.13	21.62	0.66	0.17	0.65	33.05333333	0.493333333
ENSMUSG00000030220	Arhgdib	Rho, GDP dissociation inhibitor (GDI) beta [Source:MGI Symbol;Acc:MGI:101940]	10.51	3.393720465	2.48E-24	8.78E-23	yes	up	3.21	3.84	1.76	7.09	11.1	3.54	2.936666667	7.243333333
ENSMUSG00000058022	Adtrp	androgen dependent TFPI regulating protein [Source:MGI Symbol;Acc:MGI:1924596]	0.091	-3.454680927	3.06E-24	1.07E-22	yes	down	134.04	98.98	83.47	3.3	1.36	0.9	105.4966667	1.853333333
MSTRG.32050		-	13.296	3.732906878	4.19E-24	1.46E-22	yes	up	0.16	0.19	0.1	0.35	0.53	0.44	0.15	0.44
ENSMUSG00000030278	Cidec	cell death-inducing DFFA-like effector c [Source:MGI Symbol;Acc:MGI:95585]	129.043	7.011703521	4.44E-24	1.54E-22	yes	up	0.05	0.07	0.04	1.29	1.23	1.98	0.053333333	1.5
ENSMUSG00000040613	Apobec1	apolipoprotein B mRNA editing enzyme, catalytic polypeptide 1 [Source:MGI Symbol;Acc:MGI:103298]	10.294	3.363713881	4.75E-24	1.64E-22	yes	up	2.34	1.78	0.95	4.39	6.32	1.79	1.69	4.166666667
ENSMUSG00000026981	Il1rn	interleukin 1 receptor antagonist [Source:MGI Symbol;Acc:MGI:96547]	230.099	7.84611146	1.12E-23	3.81E-22	yes	up	0.06	0.09	0	2.69	1.67	1.53	0.05	1.963333333
ENSMUSG00000021567	Nkd2	naked cuticle 2 homolog (Drosophila) [Source:MGI Symbol;Acc:MGI:1919543]	41.68	5.381276579	1.44E-23	4.87E-22	yes	up	0.08	0.08	0.03	0.29	0.79	0.43	0.063333333	0.503333333
ENSMUSG00000021999	Cpb2	carboxypeptidase B2 (plasma) [Source:MGI Symbol;Acc:MGI:1891837]	0.093	-3.421799954	1.57E-23	5.30E-22	yes	down	15.58	16	8.24	0.25	0.29	0.28	13.27333333	0.273333333
ENSMUSG00000013707	Tnfaip8l2	tumor necrosis factor, alpha-induced protein 8-like 2 [Source:MGI Symbol;Acc:MGI:1917019]	26.071	4.70435889	1.59E-23	5.35E-22	yes	up	0.44	0.75	0.23	2.37	4.52	1.47	0.473333333	2.786666667
MSTRG.6542		-	29.77	4.895784584	1.81E-23	6.06E-22	yes	up	0.72	1.08	2.12	8.13	14.03	8.24	1.306666667	10.13333333
ENSMUSG00000002020	Ltbp2	latent transforming growth factor beta binding protein 2 [Source:MGI Symbol;Acc:MGI:99502]	162.776	7.346745216	2.07E-23	6.89E-22	yes	up	0.21	0.01	0.01	0.4	1	0.7	0.076666667	0.7
ENSMUSG00000009614	Sardh	sarcosine dehydrogenase [Source:MGI Symbol;Acc:MGI:2183102]	0.098	-3.348006864	2.31E-23	7.67E-22	yes	down	90.14	93	48.6	0.57	2.28	1.52	77.24666667	1.456666667
ENSMUSG00000020388	Pdlim4	PDZ and LIM domain 4 [Source:MGI Symbol;Acc:MGI:1353470]	15.294	3.934876338	2.39E-23	7.93E-22	yes	up	0.77	0.6	0.46	2.88	2.54	1.12	0.61	2.18
ENSMUSG00000046093	Hpcal4	hippocalcin-like 4 [Source:MGI Symbol;Acc:MGI:2157521]	43.011	5.426622372	2.77E-23	9.10E-22	yes	up	0.02	0.04	0.02	0.32	0.45	0.24	0.026666667	0.336666667
ENSMUSG00000021384	Susd3	sushi domain containing 3 [Source:MGI Symbol;Acc:MGI:1913579]	0.087	-3.516541399	3.89E-23	1.28E-21	yes	down	22.46	27.02	12.56	0.6	0.45	0.26	20.68	0.436666667
ENSMUSG00000037762	Slc16a9	solute carrier family 16 (monocarboxylic acid transporters), member 9 [Source:MGI Symbol;Acc:MGI:1914109]	0.072	-3.794218946	4.05E-23	1.33E-21	yes	down	8.94	7.62	4.06	0.11	0.06	0.15	6.873333333	0.106666667
ENSMUSG00000036123	Slc9a3	solute carrier family 9 (sodium/hydrogen exchanger), member 3 [Source:MGI Symbol;Acc:MGI:105064]	0.092	-3.443193624	4.23E-23	1.38E-21	yes	down	5.88	5.09	4.02	0.29	0.05	0.13	4.996666667	0.156666667
ENSMUSG00000051262	Nat8f3	N-acetyltransferase 8 (GCN5-related) family member 3 [Source:MGI Symbol;Acc:MGI:2136449]	0.049	-4.361590285	4.78E-23	1.56E-21	yes	down	19.71	17.42	8.99	0.32	0.17	0.02	15.37333333	0.17
ENSMUSG00000006345	Ggt1	gamma-glutamyltransferase 1 [Source:MGI Symbol;Acc:MGI:95706]	0.087	-3.526963026	5.50E-23	1.78E-21	yes	down	692.65	929.03	580.19	16.82	9.2	20.89	733.9566667	15.63666667
ENSMUSG00000027887	Sypl2	synaptophysin-like 2 [Source:MGI Symbol;Acc:MGI:1328311]	0.09	-3.472323731	5.95E-23	1.92E-21	yes	down	6.76	5.34	3.37	0.08	0.22	0.08	5.156666667	0.126666667
ENSMUSG00000001131	Timp1	tissue inhibitor of metalloproteinase 1 [Source:MGI Symbol;Acc:MGI:98752]	46.276	5.532194696	6.50E-23	2.08E-21	yes	up	0.47	0.28	0.31	6.31	3.9	1.58	0.353333333	3.93
ENSMUSG00000031762	Mt2	metallothionein 2 [Source:MGI Symbol;Acc:MGI:97172]	12.128	3.600262707	1.33E-22	4.13E-21	yes	up	18.16	31.01	12.59	93.14	55.09	27.99	20.58666667	58.74
ENSMUSG00000044249	Defb29	defensin beta 29 [Source:MGI Symbol;Acc:MGI:1922650]	0.084	-3.566106468	1.52E-22	4.70E-21	yes	down	86.33	135.51	80.05	2.04	2.57	1.47	100.63	2.026666667
ENSMUSG00000038641	Akr1d1	aldo-keto reductase family 1, member D1 [Source:MGI Symbol;Acc:MGI:2384785]	0.059	-4.07693854	1.57E-22	4.86E-21	yes	down	8.82	6.77	4.81	0.1	0.06	0.11	6.8	0.09
ENSMUSG00000047746	Fbxo40	F-box protein 40 [Source:MGI Symbol;Acc:MGI:2443753]	0.072	-3.789198564	1.61E-22	4.97E-21	yes	down	3.51	3.25	2.08	0.08	0.05	0.02	2.946666667	0.05
ENSMUSG00000068205	Macrod2	MACRO domain containing 2 [Source:MGI Symbol;Acc:MGI:1920149]	0.087	-3.527567687	3.39E-22	1.03E-20	yes	down	12.01	9.55	7.35	0.14	0.83	0.18	9.636666667	0.383333333
ENSMUSG00000053007	Creb5	cAMP responsive element binding protein 5 [Source:MGI Symbol;Acc:MGI:2443973]	21.416	4.420594355	3.54E-22	1.07E-20	yes	up	0.21	0.04	0.03	0.34	0.52	0.21	0.093333333	0.356666667
ENSMUSG00000027398	Il1b	interleukin 1 beta [Source:MGI Symbol;Acc:MGI:96543]	44.753	5.483927033	4.11E-22	1.24E-20	yes	up	0.23	0.24	0.15	3.35	2.51	0.68	0.206666667	2.18
ENSMUSG00000038670	Mybpc2	myosin binding protein C, fast-type [Source:MGI Symbol;Acc:MGI:1336170]	60.196	5.911593185	4.33E-22	1.30E-20	yes	up	0.09	0.03	0.04	0.67	1.25	0.26	0.053333333	0.726666667
ENSMUSG00000020651	Slc26a4	solute carrier family 26, member 4 [Source:MGI Symbol;Acc:MGI:1346029]	0.037	-4.77522073	4.79E-22	1.44E-20	yes	down	18.15	25.93	12.44	0.21	0.05	0.06	18.84	0.106666667
MSTRG.2786		-	16.637	4.056343851	5.56E-22	1.66E-20	yes	up	0.77	0.54	1.12	4.16	2.86	2.89	0.81	3.303333333
ENSMUSG00000015950	Ncf1	neutrophil cytosolic factor 1 [Source:MGI Symbol;Acc:MGI:97283]	31.132	4.960317571	6.05E-22	1.80E-20	yes	up	0.17	0.32	0.1	1.69	2.31	0.45	0.196666667	1.483333333
ENSMUSG00000022488	Nckap1l	NCK associated protein 1 like [Source:MGI Symbol;Acc:MGI:1926063]	15.31	3.93644506	6.49E-22	1.93E-20	yes	up	0.38	0.37	0.2	1.31	1.73	0.39	0.316666667	1.143333333
ENSMUSG00000037443	Cep85	centrosomal protein 85 [Source:MGI Symbol;Acc:MGI:1917262]	114.294	6.836603614	1.15E-21	3.38E-20	yes	up	9.63	3.31	7.13	48.37	411.24	262.07	6.69	240.56
ENSMUSG00000069456	Rdh16	retinol dehydrogenase 16 [Source:MGI Symbol;Acc:MGI:1201375]	0.083	-3.599354114	1.22E-21	3.57E-20	yes	down	19.9	17.2	10.67	0.48	0.13	0.34	15.92333333	0.316666667
ENSMUSG00000075025	Gm10804	predicted gene 10804 [Source:MGI Symbol;Acc:MGI:3641755]	0.09	-3.468837	1.23E-21	3.59E-20	yes	down	30.58	34.55	20.32	0.49	0.32	0.65	28.48333333	0.486666667
ENSMUSG00000020901	Pik3r5	phosphoinositide-3-kinase, regulatory subunit 5, p101 [Source:MGI Symbol;Acc:MGI:2443588]	32.24	5.010798089	1.51E-21	4.40E-20	yes	up	0.04	0.07	0.02	0.4	0.33	0.21	0.043333333	0.313333333
ENSMUSG00000098112	Bin2	bridging integrator 2 [Source:MGI Symbol;Acc:MGI:3611448]	20.976	4.390654503	1.84E-21	5.29E-20	yes	up	0.2	0.46	0.18	1.31	2.64	1.77	0.28	1.906666667
ENSMUSG00000063903	Klk1	kallikrein 1 [Source:MGI Symbol;Acc:MGI:102850]	0.054	-4.216893653	2.24E-21	6.37E-20	yes	down	1057.3	1467.46	922.01	10.98	6.83	20.22	1148.923333	12.67666667
MSTRG.25239		-	0.01	-6.663260706	2.39E-21	6.80E-20	yes	down	9.27	5.76	4.55	0.02	0	0.03	6.526666667	0.016666667
ENSMUSG00000037411	Serpine1	serine (or cysteine) peptidase inhibitor, clade E, member 1 [Source:MGI Symbol;Acc:MGI:97608]	68.736	6.102995684	6.01E-21	1.66E-19	yes	up	0.04	0.04	0.03	0.42	0.83	0.36	0.036666667	0.536666667
ENSMUSG00000021263	Degs2	delta(4)-desaturase, sphingolipid 2 [Source:MGI Symbol;Acc:MGI:1917309]	0.033	-4.926992507	6.77E-21	1.87E-19	yes	down	16.17	24.08	8.09	0.12	0.16	0.09	16.11333333	0.123333333
ENSMUSG00000012187	Mogat1	monoacylglycerol O-acyltransferase 1 [Source:MGI Symbol;Acc:MGI:1915643]	0.082	-3.604230771	7.30E-21	2.01E-19	yes	down	60.8	52.36	28.87	1.35	0.97	1.24	47.34333333	1.186666667
ENSMUSG00000027004	Frzb	frizzled-related protein [Source:MGI Symbol;Acc:MGI:892032]	0.097	-3.361846933	8.78E-21	2.41E-19	yes	down	8.84	5.63	3.9	0.23	0.13	0.13	6.123333333	0.163333333
ENSMUSG00000048865	Arhgap30	Rho GTPase activating protein 30 [Source:MGI Symbol;Acc:MGI:2684948]	24.15	4.593922257	1.03E-20	2.83E-19	yes	up	0.14	0.14	0.1	0.78	1.26	0.23	0.126666667	0.756666667
ENSMUSG00000032098	Treh	trehalase (brush-border membrane glycoprotein) [Source:MGI Symbol;Acc:MGI:1926230]	0.077	-3.698474824	1.11E-20	3.04E-19	yes	down	24.82	27.79	11.12	0.63	0.29	0.12	21.24333333	0.346666667
MSTRG.2191		-	99.164	6.631743978	1.51E-20	4.09E-19	yes	up	0.35	0.15	0	5.38	3.8	1.18	0.166666667	3.453333333
ENSMUSG00000046634	Pkd1l1	polycystic kidney disease 1 like 1 [Source:MGI Symbol;Acc:MGI:2156538]	1687.243	10.72045226	1.66E-20	4.49E-19	yes	up	0	0.02	0	8.26	27.14	7.46	0.006666667	14.28666667
ENSMUSG00000029380	Cxcl1	chemokine (C-X-C motif) ligand 1 [Source:MGI Symbol;Acc:MGI:108068]	133.962	7.065677444	1.69E-20	4.56E-19	yes	up	0.05	0.2	0.09	5.06	1.29	2.98	0.113333333	3.11
MSTRG.32059		-	29.157	4.865766909	1.85E-20	4.97E-19	yes	up	0.05	0.06	0.04	0.23	0.57	0.23	0.05	0.343333333
ENSMUSG00000039364	Sectm1b	secreted and transmembrane 1B [Source:MGI Symbol;Acc:MGI:1929083]	0.053	-4.225779665	2.33E-20	6.22E-19	yes	down	11.94	8.45	4.75	0.08	0.06	0.15	8.38	0.096666667
ENSMUSG00000030844	Rgs10	regulator of G-protein signalling 10 [Source:MGI Symbol;Acc:MGI:1915115]	16.97	4.084909852	3.61E-20	9.50E-19	yes	up	1.7	1.94	0.81	4.22	10.62	2.8	1.483333333	5.88
MSTRG.32270		-	253.535	7.986038729	5.94E-20	1.54E-18	yes	up	1.63	1.01	2.98	27.47	206.49	141.36	1.873333333	125.1066667
ENSMUSG00000042371	Slc5a10	solute carrier family 5 (sodium/glucose cotransporter), member 10 [Source:MGI Symbol;Acc:MGI:1926089]	0.046	-4.455246993	9.29E-20	2.37E-18	yes	down	33.44	31.76	15.69	0.54	0.06	0.19	26.96333333	0.263333333
ENSMUSG00000038301	Snx10	sorting nexin 10 [Source:MGI Symbol;Acc:MGI:1919232]	15.296	3.935113155	1.23E-19	3.12E-18	yes	up	0.45	0.24	0.22	1.04	1.8	0.56	0.303333333	1.133333333
ENSMUSG00000066072	Cyp4a10	cytochrome P450, family 4, subfamily a, polypeptide 10 [Source:MGI Symbol;Acc:MGI:88611]	0.088	-3.514219442	1.42E-19	3.57E-18	yes	down	65.58	45.2	34.83	1.17	0.39	0.92	48.53666667	0.826666667
ENSMUSG00000040552	C3ar1	complement component 3a receptor 1 [Source:MGI Symbol;Acc:MGI:1097680]	26.98	4.753795572	1.96E-19	4.91E-18	yes	up	0.04	0.08	0.02	0.31	0.43	0.18	0.046666667	0.306666667
ENSMUSG00000034227	Foxj1	forkhead box J1 [Source:MGI Symbol;Acc:MGI:1347474]	65.411	6.031454877	2.12E-19	5.27E-18	yes	up	0.09	0.07	0.05	0.94	2.2	0.28	0.07	1.14
ENSMUSG00000030680	Pagr1a	PAXIP1 associated glutamate rich protein 1A [Source:MGI Symbol;Acc:MGI:1914528]	14.888	3.896100788	2.94E-19	7.26E-18	yes	up	2.58	3.9	3.8	2.51	2.52	3.13	3.426666667	2.72
ENSMUSG00000040183	Ankrd6	ankyrin repeat domain 6 [Source:MGI Symbol;Acc:MGI:2154278]	10.383	3.376211336	3.05E-19	7.51E-18	yes	up	0.14	0.17	0.13	0.39	0.44	0.22	0.146666667	0.35
ENSMUSG00000000805	Car4	carbonic anhydrase 4 [Source:MGI Symbol;Acc:MGI:1096574]	0.098	-3.350548765	3.34E-19	8.20E-18	yes	down	99.17	95.29	70.21	1.74	1.08	3.28	88.22333333	2.033333333
ENSMUSG00000025017	Pik3ap1	phosphoinositide-3-kinase adaptor protein 1 [Source:MGI Symbol;Acc:MGI:1933177]	111.352	6.798984209	4.62E-19	1.13E-17	yes	up	0.08	0.03	0	0.97	1.35	0.28	0.036666667	0.866666667
ENSMUSG00000019122	Ccl9	chemokine (C-C motif) ligand 9 [Source:MGI Symbol;Acc:MGI:104533]	19.558	4.289702265	4.88E-19	1.19E-17	yes	up	0.57	0.53	0.06	0.82	2.12	0.29	0.386666667	1.076666667
ENSMUSG00000069609	Cd300ld4	CD300 molecule like family member D4 [Source:MGI Symbol;Acc:MGI:3702658]	47	5.554591792	4.99E-19	1.21E-17	yes	up	0.14	0.19	0.02	1.27	1.14	0.67	0.116666667	1.026666667
ENSMUSG00000049625	Tifab	TRAF-interacting protein with forkhead-associated domain, family member B [Source:MGI Symbol;Acc:MGI:2385852]	17.024	4.089475508	5.24E-19	1.27E-17	yes	up	0.24	0.31	0.06	0.86	1.08	0.35	0.203333333	0.763333333
ENSMUSG00000028017	Egf	epidermal growth factor [Source:MGI Symbol;Acc:MGI:95290]	0.036	-4.813118755	5.56E-19	1.34E-17	yes	down	19.43	16.79	5.59	0.13	0.03	0.28	13.93666667	0.146666667
ENSMUSG00000038745	Nlrp6	NLR family, pyrin domain containing 6 [Source:MGI Symbol;Acc:MGI:2141990]	0.09	-3.475473319	5.99E-19	1.44E-17	yes	down	9.44	9.06	11.57	0.2	0.18	0.28	10.02333333	0.22
ENSMUSG00000028108	Ecm1	extracellular matrix protein 1 [Source:MGI Symbol;Acc:MGI:103060]	0.097	-3.363603403	6.29E-19	1.51E-17	yes	down	58.22	47.53	36.74	2.08	0.69	3.06	47.49666667	1.943333333
ENSMUSG00000030786	Itgam	integrin alpha M [Source:MGI Symbol;Acc:MGI:96607]	20.109	4.329753209	7.03E-19	1.68E-17	yes	up	0.03	0.1	0.05	0.33	0.31	0.2	0.06	0.28
MSTRG.31390		-	19.146	4.259002694	7.66E-19	1.82E-17	yes	up	0.3	0.1	0.11	0.48	0.83	0.79	0.17	0.7
ENSMUSG00000099974	Bcl2a1d	B cell leukemia/lymphoma 2 related protein A1d [Source:MGI Symbol;Acc:MGI:1278325]	35.338	5.143160136	8.03E-19	1.90E-17	yes	up	0.5	0.38	0.16	3.78	3.73	1.02	0.346666667	2.843333333
ENSMUSG00000112129	Pbld1	phenazine biosynthesis-like protein domain containing 1 [Source:MGI Symbol;Acc:MGI:1915621]	0.072	-3.79240007	8.32E-19	1.97E-17	yes	down	34.17	18.16	23.59	1.02	0.35	0.31	25.30666667	0.56
MSTRG.13334		-	123.058	6.943196538	1.24E-18	2.90E-17	yes	up	1.07	0.17	1.93	21.03	27.49	20.55	1.056666667	23.02333333
ENSMUSG00000036853	Mcoln3	mucolipin 3 [Source:MGI Symbol;Acc:MGI:1890500]	0.049	-4.345475383	1.28E-18	2.98E-17	yes	down	4.96	4.43	3.69	0.05	0.02	0.07	4.36	0.046666667
ENSMUSG00000052889	Prkcb	protein kinase C, beta [Source:MGI Symbol;Acc:MGI:97596]	36.393	5.185588929	1.30E-18	3.04E-17	yes	up	0.06	0.2	0.05	0.89	0.88	0.55	0.103333333	0.773333333
ENSMUSG00000041219	Arhgap11a	Rho GTPase activating protein 11A [Source:MGI Symbol;Acc:MGI:2444300]	16.108	4.009691673	1.74E-18	4.02E-17	yes	up	0.09	0.19	0.07	0.36	0.65	0.26	0.116666667	0.423333333
MSTRG.20094		-	2094.782	11.03258473	1.82E-18	4.20E-17	yes	up	0	0	0	0.68	0.4	0.77	0	0.616666667
ENSMUSG00000034116	Vav1	vav 1 oncogene [Source:MGI Symbol;Acc:MGI:98923]	17.74	4.148939416	1.93E-18	4.44E-17	yes	up	0.44	0.56	0.26	1.12	2.03	0.45	0.42	1.2
MSTRG.23525		-	23.629	4.562499907	1.97E-18	4.51E-17	yes	up	0.2	0.18	0.06	0.86	0.55	0.83	0.146666667	0.746666667
MSTRG.11068		-	60.822	5.926527452	2.52E-18	5.76E-17	yes	up	4.82	1.83	4.64	106.51	60.96	14.11	3.763333333	60.52666667
ENSMUSG00000038526	Car14	carbonic anhydrase 14 [Source:MGI Symbol;Acc:MGI:1344341]	0.008	-7.019354667	2.56E-18	5.83E-17	yes	down	27.21	17.38	8.65	0.11	0	0	17.74666667	0.036666667
ENSMUSG00000004105	Angptl2	angiopoietin-like 2 [Source:MGI Symbol;Acc:MGI:1347002]	0.084	-3.570931685	3.39E-18	7.69E-17	yes	down	4.47	4.6	2.28	0.1	0.05	0.2	3.783333333	0.116666667
ENSMUSG00000008496	Pou2f2	POU domain, class 2, transcription factor 2 [Source:MGI Symbol;Acc:MGI:101897]	22.937	4.519586878	4.21E-18	9.46E-17	yes	up	0.11	0.18	0.01	0.38	0.39	0.14	0.1	0.303333333
ENSMUSG00000104375	Gm6300	predicted gene 6300 [Source:MGI Symbol;Acc:MGI:3648364]	0.001	-10.35387795	5.00E-18	1.11E-16	yes	down	29.23	28.24	21.77	0	0	0	26.41333333	0
ENSMUSG00000030148	Clec4a2	C-type lectin domain family 4, member a2 [Source:MGI Symbol;Acc:MGI:1349412]	53.549	5.742795991	5.26E-18	1.17E-16	yes	up	0.18	0.26	0.12	4.36	4.04	0.58	0.186666667	2.993333333
ENSMUSG00000053862	Slc51b	solute carrier family 51, beta subunit [Source:MGI Symbol;Acc:MGI:3582052]	0.079	-3.664383195	5.35E-18	1.19E-16	yes	down	59.05	41.68	31.17	0.68	0.37	1.21	43.96666667	0.753333333
ENSMUSG00000024411	Aqp4	aquaporin 4 [Source:MGI Symbol;Acc:MGI:107387]	0.054	-4.20385631	6.01E-18	1.33E-16	yes	down	4.89	2.88	1.8	0.07	0.03	0.02	3.19	0.04
ENSMUSG00000029919	Hpgds	hematopoietic prostaglandin D synthase [Source:MGI Symbol;Acc:MGI:1859384]	26.937	4.751514189	8.10E-18	1.78E-16	yes	up	0.05	0.08	0.05	0.42	0.6	0.17	0.06	0.396666667
ENSMUSG00000002076	Hsf2bp	heat shock transcription factor 2 binding protein [Source:MGI Symbol;Acc:MGI:1921627]	0.068	-3.87393012	8.11E-18	1.78E-16	yes	down	9.89	8.84	6.54	0.17	0.05	0.05	8.423333333	0.09
ENSMUSG00000027762	Sucnr1	succinate receptor 1 [Source:MGI Symbol;Acc:MGI:1934135]	0.027	-5.23729128	8.23E-18	1.80E-16	yes	down	15.83	12.04	5.46	0.07	0.07	0.05	11.11	0.063333333
MSTRG.23830		-	16.991	4.086675904	1.00E-17	2.18E-16	yes	up	0.35	0.15	0.21	0.85	1.64	0.37	0.236666667	0.953333333
ENSMUSG00000042797	Aqp11	aquaporin 11 [Source:MGI Symbol;Acc:MGI:1913583]	0.021	-5.573377134	1.15E-17	2.48E-16	yes	down	8.92	8.4	4.17	0	0.03	0.03	7.163333333	0.02
ENSMUSG00000066071	Cyp4a12a	cytochrome P450, family 4, subfamily a, polypeptide 12a [Source:MGI Symbol;Acc:MGI:88612]	0.083	-3.596969036	1.19E-17	2.56E-16	yes	down	95.99	204.59	85.31	3	1.17	2.64	128.63	2.27
MSTRG.19268		-	14.649	3.87274471	1.22E-17	2.61E-16	yes	up	6.83	5.78	3.7	2.56	9.5	2.07	5.436666667	4.71
MSTRG.20356		-	30.657	4.938125396	1.35E-17	2.89E-16	yes	up	0.02	0.05	0.01	0.24	0.17	0.14	0.026666667	0.183333333
ENSMUSG00000002797	Ggct	gamma-glutamyl cyclotransferase [Source:MGI Symbol;Acc:MGI:95700]	0.095	-3.396483012	1.53E-17	3.26E-16	yes	down	54.95	38.24	28.38	0.42	0.84	0.77	40.52333333	0.676666667
ENSMUSG00000074480	Mex3a	mex3 RNA binding family member A [Source:MGI Symbol;Acc:MGI:1919890]	12.769	3.674619481	1.74E-17	3.69E-16	yes	up	0.05	0.11	0.09	0.26	0.3	0.19	0.083333333	0.25
ENSMUSG00000026535	Ifi202b	interferon activated gene 202B [Source:MGI Symbol;Acc:MGI:1347083]	16.431	4.038351295	1.97E-17	4.16E-16	yes	up	0.73	0.25	0.22	1.92	1.84	0.73	0.4	1.496666667
ENSMUSG00000042118	Bhmt2	betaine-homocysteine methyltransferase 2 [Source:MGI Symbol;Acc:MGI:1891379]	0.057	-4.13907175	2.38E-17	4.99E-16	yes	down	31.73	27	20.46	0.2	0.15	0.58	26.39666667	0.31
ENSMUSG00000053897	Slc39a8	solute carrier family 39 (metal ion transporter), member 8 [Source:MGI Symbol;Acc:MGI:1914797]	0.076	-3.722565866	2.41E-17	5.05E-16	yes	down	6.49	5.21	2.23	0.05	0.11	0.06	4.643333333	0.073333333
ENSMUSG00000035385	Ccl2	chemokine (C-C motif) ligand 2 [Source:MGI Symbol;Acc:MGI:98259]	39.038	5.286807029	2.48E-17	5.20E-16	yes	up	0.23	0.18	0.11	1.52	2.6	1.16	0.173333333	1.76
MSTRG.9829		-	0.001	-10.51806944	3.81E-17	7.75E-16	yes	down	80.75	64.98	17.15	0	0	0	54.29333333	0
ENSMUSG00000073490	Ifi207	interferon activated gene 207 [Source:MGI Symbol;Acc:MGI:2138302]	42.733	5.41728292	4.34E-17	8.80E-16	yes	up	0.12	0.1	0	0.81	1.09	0.24	0.073333333	0.713333333
ENSMUSG00000082676	Gm11843	predicted gene 11843 [Source:MGI Symbol;Acc:MGI:3651166]	23.28	4.541011899	4.42E-17	8.94E-16	yes	up	0.03	0.11	0.02	0.39	0.25	0.18	0.053333333	0.273333333
ENSMUSG00000031165	Was	Wiskott-Aldrich syndrome [Source:MGI Symbol;Acc:MGI:105059]	35.357	5.143910505	5.99E-17	1.20E-15	yes	up	0.1	0.1	0.07	0.6	1.37	0.32	0.09	0.763333333
MSTRG.15910		-	18.463	4.206597279	6.09E-17	1.21E-15	yes	up	0.91	0.43	0.82	4.13	4.47	0.68	0.72	3.093333333
ENSMUSG00000060487	Samd5	sterile alpha motif domain containing 5 [Source:MGI Symbol;Acc:MGI:2444815]	11.17	3.481494527	7.68E-17	1.53E-15	yes	up	0.11	0.19	0.1	0.41	0.22	0.34	0.133333333	0.323333333
MSTRG.25975		-	27.294	4.770514429	8.49E-17	1.68E-15	yes	up	0.16	0.13	0.07	1.09	0.28	0.75	0.12	0.706666667
MSTRG.2270		-	202.344	7.660666556	9.22E-17	1.82E-15	yes	up	0.02	0.03	0.03	2.16	2.24	0.87	0.026666667	1.756666667
ENSMUSG00000026984	Il1f6	interleukin 1 family, member 6 [Source:MGI Symbol;Acc:MGI:1859324]	1092.308	10.09316386	9.95E-17	1.95E-15	yes	up	0.06	0	0	6.57	5.41	3.7	0.02	5.226666667
ENSMUSG00000025044	Msr1	macrophage scavenger receptor 1 [Source:MGI Symbol;Acc:MGI:98257]	29.423	4.878873556	9.99E-17	1.96E-15	yes	up	0.05	0.05	0.05	0.73	0.7	0.5	0.05	0.643333333
MSTRG.25831		-	14.958	3.902817806	1.07E-16	2.10E-15	yes	up	0.31	0.28	0.31	1.08	1.78	0.48	0.3	1.113333333
ENSMUSG00000034394	Lif	leukemia inhibitory factor [Source:MGI Symbol;Acc:MGI:96787]	60.58	5.920775607	1.13E-16	2.22E-15	yes	up	0	0.07	0.01	0.38	0.58	0.39	0.026666667	0.45
ENSMUSG00000038092	Hsd3b5	hydroxy-delta-5-steroid dehydrogenase, 3 beta- and steroid delta-isomerase 5 [Source:MGI Symbol;Acc:MGI:104645]	0.012	-6.329377071	1.15E-16	2.24E-15	yes	down	11.91	12.93	6.79	0	0	0.08	10.54333333	0.026666667
MSTRG.7928		-	38.149	5.253577416	1.21E-16	2.34E-15	yes	up	0.15	0.11	0.17	1.61	2.53	0.29	0.143333333	1.476666667
ENSMUSG00000028976	Slc2a5	solute carrier family 2 (facilitated glucose transporter), member 5 [Source:MGI Symbol;Acc:MGI:1928369]	0.04	-4.660088502	1.32E-16	2.56E-15	yes	down	4.45	4.56	2.03	0.04	0.12	0.02	3.68	0.06
ENSMUSG00000069792	Wfdc17	WAP four-disulfide core domain 17 [Source:MGI Symbol;Acc:MGI:3649773]	21.484	4.425198859	1.36E-16	2.63E-15	yes	up	1.36	1.09	0.48	4.58	7.97	2.27	0.976666667	4.94
ENSMUSG00000064063	BC048507	cDNA sequence BC048507 [Source:MGI Symbol;Acc:MGI:3040680]	160.393	7.325469052	1.56E-16	2.99E-15	yes	up	0.36	1.29	1.75	27.09	39.47	64.38	1.133333333	43.64666667
ENSMUSG00000026768	Itga8	integrin alpha 8 [Source:MGI Symbol;Acc:MGI:109442]	0.057	-4.138922607	1.96E-16	3.73E-15	yes	down	1.8	2.08	1.38	0.1	0.02	0.02	1.753333333	0.046666667
ENSMUSG00000025911	Adhfe1	alcohol dehydrogenase, iron containing, 1 [Source:MGI Symbol;Acc:MGI:1923437]	0.074	-3.747790353	2.04E-16	3.89E-15	yes	down	77.76	60.98	43.02	0.71	0.33	1.09	60.58666667	0.71
MSTRG.20026		-	13.225	3.725180629	2.23E-16	4.25E-15	yes	up	0.5	0.23	0.15	0.79	1.76	0.5	0.293333333	1.016666667
ENSMUSG00000039936	Pik3cd	phosphatidylinositol 3-kinase catalytic delta polypeptide [Source:MGI Symbol;Acc:MGI:1098211]	10.156	3.344318986	2.50E-16	4.74E-15	yes	up	0.26	0.33	0.15	0.62	1.14	0.24	0.246666667	0.666666667
ENSMUSG00000029088	Kcnip4	Kv channel interacting protein 4 [Source:MGI Symbol;Acc:MGI:1933131]	24.572	4.618931416	2.81E-16	5.31E-15	yes	up	0.12	0.1	0.1	0.99	0.43	0.72	0.106666667	0.713333333
ENSMUSG00000028655	Mfsd2a	major facilitator superfamily domain containing 2A [Source:MGI Symbol;Acc:MGI:1923824]	0.053	-4.229826341	3.27E-16	6.18E-15	yes	down	11.69	20.39	6.69	0.23	0.06	0.15	12.92333333	0.146666667
ENSMUSG00000027577	Chrna4	cholinergic receptor, nicotinic, alpha polypeptide 4 [Source:MGI Symbol;Acc:MGI:87888]	0.037	-4.748140519	3.46E-16	6.51E-15	yes	down	2.36	2.72	1.84	0.03	0.01	0.02	2.306666667	0.02
ENSMUSG00000070645	Ren1	renin 1 structural [Source:MGI Symbol;Acc:MGI:97898]	0.056	-4.162585297	3.77E-16	7.07E-15	yes	down	96.47	51.27	16.62	0.58	1.16	0.24	54.78666667	0.66
MSTRG.23321		-	60.43	5.917187811	4.66E-16	8.71E-15	yes	up	0.03	0.03	0	0.23	0.28	0.18	0.02	0.23
ENSMUSG00000049037	Clec4a1	C-type lectin domain family 4, member a1 [Source:MGI Symbol;Acc:MGI:3036291]	21.66	4.436945904	5.01E-16	9.34E-15	yes	up	0.17	0.31	0.05	1.11	0.88	0.53	0.176666667	0.84
ENSMUSG00000039639	Kcne1	potassium voltage-gated channel, Isk-related subfamily, member 1 [Source:MGI Symbol;Acc:MGI:96673]	0.07	-3.842408701	5.51E-16	1.02E-14	yes	down	7.79	14.46	5.51	0.29	0.01	0.09	9.253333333	0.13
ENSMUSG00000030747	Dgat2	diacylglycerol O-acyltransferase 2 [Source:MGI Symbol;Acc:MGI:1915050]	0.077	-3.707160116	5.59E-16	1.03E-14	yes	down	19.02	17.9	8.56	0.16	0.13	0.44	15.16	0.243333333
ENSMUSG00000022215	Fitm1	fat storage-inducing transmembrane protein 1 [Source:MGI Symbol;Acc:MGI:1915930]	0.083	-3.594573378	7.80E-16	1.43E-14	yes	down	29.51	26.29	16.16	0.94	0.23	0.18	23.98666667	0.45
ENSMUSG00000025127	Gcgr	glucagon receptor [Source:MGI Symbol;Acc:MGI:99572]	0.069	-3.853506137	8.66E-16	1.59E-14	yes	down	6.18	5.61	4.19	0.07	0.06	0.13	5.326666667	0.086666667
MSTRG.21659		-	40.377	5.335477443	8.77E-16	1.60E-14	yes	up	1.15	0.46	0	3.83	3.41	5.32	0.536666667	4.186666667
MSTRG.8153		-	198.073	7.629891833	8.78E-16	1.60E-14	yes	up	4.08	1.72	5.69	45.8	307.72	194	3.83	182.5066667
ENSMUSG00000059498	Fcgr3	Fc receptor, IgG, low affinity III [Source:MGI Symbol;Acc:MGI:95500]	21.974	4.457751448	9.69E-16	1.76E-14	yes	up	0.33	0.43	0.07	1.26	2.12	0.63	0.276666667	1.336666667
MSTRG.5223		-	708.741	9.46911489	1.16E-15	2.10E-14	yes	up	0.18	0	0	17.41	3.35	5.68	0.06	8.813333333
ENSMUSG00000063590	Slc22a28	solute carrier family 22, member 28 [Source:MGI Symbol;Acc:MGI:3645714]	0.003	-8.388194294	1.62E-15	2.89E-14	yes	down	16.35	21.84	14.82	0	0.04	0	17.67	0.013333333
ENSMUSG00000034641	Cd300ld	CD300 molecule like family member d [Source:MGI Symbol;Acc:MGI:2442358]	19.867	4.312296555	1.87E-15	3.33E-14	yes	up	0.09	0.08	0.05	0.33	0.38	0.3	0.073333333	0.336666667
ENSMUSG00000022821	Hgd	homogentisate 1, 2-dioxygenase [Source:MGI Symbol;Acc:MGI:96078]	0.073	-3.775401865	4.28E-15	7.37E-14	yes	down	102.42	107.98	72.34	2.21	0.5	2.55	94.24666667	1.753333333
ENSMUSG00000000628	Hk2	hexokinase 2 [Source:MGI Symbol;Acc:MGI:1315197]	64.953	6.021320673	4.41E-15	7.60E-14	yes	up	0	0.12	0.2	1.17	0.47	0.18	0.106666667	0.606666667
ENSMUSG00000056487	Mettl7a2	methyltransferase like 7A2 [Source:MGI Symbol;Acc:MGI:3026615]	0.087	-3.525601426	4.44E-15	7.64E-14	yes	down	17.33	7.05	7.68	0.25	0.19	0.18	10.68666667	0.206666667
ENSMUSG00000004730	Adgre1	adhesion G protein-coupled receptor E1 [Source:MGI Symbol;Acc:MGI:106912]	18.756	4.229277024	4.99E-15	8.54E-14	yes	up	0.14	0.17	0.04	0.4	0.72	0.2	0.116666667	0.44
ENSMUSG00000021751	Acox2	acyl-Coenzyme A oxidase 2, branched chain [Source:MGI Symbol;Acc:MGI:1934852]	0.069	-3.859385021	5.05E-15	8.63E-14	yes	down	18.8	8.73	4.64	0.36	0.22	0.12	10.72333333	0.233333333
ENSMUSG00000006469	Slc34a3	solute carrier family 34 (sodium phosphate), member 3 [Source:MGI Symbol;Acc:MGI:2159410]	0.069	-3.850382479	7.93E-15	1.33E-13	yes	down	9.92	6.83	3.2	0.08	0.36	0.12	6.65	0.186666667
ENSMUSG00000093445	Lrch4	leucine-rich repeats and calponin homology (CH) domain containing 4 [Source:MGI Symbol;Acc:MGI:1917193]	19.949	4.31824229	8.05E-15	1.35E-13	yes	up	0.12	0.13	0.13	0.68	0.9	0.25	0.126666667	0.61
MSTRG.32269		-	73.929	6.208074831	8.36E-15	1.40E-13	yes	up	8.12	8.19	10.49	34.89	234.8	189.32	8.933333333	153.0033333
ENSMUSG00000035540	Gc	group specific component [Source:MGI Symbol;Acc:MGI:95669]	18.09	4.177086256	9.33E-15	1.55E-13	yes	up	9.11	4.34	0.96	30.03	19.36	15.34	4.803333333	21.57666667
ENSMUSG00000047797	Gjb1	gap junction protein, beta 1 [Source:MGI Symbol;Acc:MGI:95719]	0.058	-4.106380521	9.63E-15	1.59E-13	yes	down	10.22	10.79	4.05	0.05	0.18	0.1	8.353333333	0.11
ENSMUSG00000031390	Avpr2	arginine vasopressin receptor 2 [Source:MGI Symbol;Acc:MGI:88123]	0.016	-5.957525928	9.94E-15	1.64E-13	yes	down	7.92	9.18	5.37	0.03	0	0.05	7.49	0.026666667
ENSMUSG00000043719	Col6a6	collagen, type VI, alpha 6 [Source:MGI Symbol;Acc:MGI:2444259]	0.008	-7.014407019	1.25E-14	2.04E-13	yes	down	2.5	1.45	2.04	0	0	0.01	1.996666667	0.003333333
ENSMUSG00000024300	Myo1f	myosin IF [Source:MGI Symbol;Acc:MGI:107711]	12.813	3.679531715	1.26E-14	2.05E-13	yes	up	0.11	0.34	0.54	0.54	0.99	0.47	0.33	0.666666667
ENSMUSG00000020566	Atp6v1c2	ATPase, H+ transporting, lysosomal V1 subunit C2 [Source:MGI Symbol;Acc:MGI:1916025]	0.048	-4.387098348	2.17E-14	3.47E-13	yes	down	8.58	12.85	6.68	0.11	0	0.19	9.37	0.1
ENSMUSG00000096979	Gm26880	predicted gene, 26880 [Source:MGI Symbol;Acc:MGI:5477374]	55.554	5.795808532	2.62E-14	4.18E-13	yes	up	5.38	1.75	6.4	21.87	95.66	51.68	4.51	56.40333333
MSTRG.8148		-	40.408	5.33656929	4.05E-14	6.38E-13	yes	up	0.09	0.04	0.02	0.22	0.49	0.47	0.05	0.393333333
ENSMUSG00000025154	Arhgap19	Rho GTPase activating protein 19 [Source:MGI Symbol;Acc:MGI:1918335]	10.803	3.433390247	4.24E-14	6.68E-13	yes	up	0.14	0.16	0.04	0.33	0.26	0.24	0.113333333	0.276666667
ENSMUSG00000036905	C1qb	complement component 1, q subcomponent, beta polypeptide [Source:MGI Symbol;Acc:MGI:88224]	12.363	3.627921677	4.44E-14	6.97E-13	yes	up	3.63	3.25	0.74	6.2	11.97	2.88	2.54	7.016666667
ENSMUSG00000087107	AI662270	expressed sequence AI662270 [Source:MGI Symbol;Acc:MGI:2144254]	14.889	3.896184077	4.95E-14	7.74E-13	yes	up	0.62	0.98	0.26	1.78	2.81	0.6	0.62	1.73
ENSMUSG00000036887	C1qa	complement component 1, q subcomponent, alpha polypeptide [Source:MGI Symbol;Acc:MGI:88223]	14.97	3.904004463	8.32E-14	1.28E-12	yes	up	2.55	3.17	0.5	6.56	11.76	2.5	2.073333333	6.94
ENSMUSG00000020143	Dock2	dedicator of cyto-kinesis 2 [Source:MGI Symbol;Acc:MGI:2149010]	12.85	3.683724326	8.65E-14	1.33E-12	yes	up	0.09	0.12	0.03	0.33	0.23	0.11	0.08	0.223333333
MSTRG.8972		-	13.028	3.703545777	8.96E-14	1.37E-12	yes	up	0.98	0.38	0.82	2.16	3.06	1.67	0.726666667	2.296666667
ENSMUSG00000060981	Hist1h4h	histone cluster 1, H4h [Source:MGI Symbol;Acc:MGI:2448427]	0.051	-4.300654109	9.20E-14	1.41E-12	yes	down	38.93	40.75	34.59	0.59	0.49	0.31	38.09	0.463333333
MSTRG.18012		-	16.261	4.023352986	9.32E-14	1.43E-12	yes	up	2.54	7.08	8.63	36.83	29.27	13.3	6.083333333	26.46666667
MSTRG.32255		-	23.918	4.580020408	1.07E-13	1.62E-12	yes	up	0.11	0.55	0.18	2.23	1.75	0.83	0.28	1.603333333
ENSMUSG00000102037	Bcl2a1a	B cell leukemia/lymphoma 2 related protein A1a [Source:MGI Symbol;Acc:MGI:102687]	84.234	6.39633171	1.17E-13	1.78E-12	yes	up	0.16	0.23	0	2.31	4.29	0.6	0.13	2.4
ENSMUSG00000023078	Cxcl13	chemokine (C-X-C motif) ligand 13 [Source:MGI Symbol;Acc:MGI:1888499]	57.223	5.838519585	1.23E-13	1.87E-12	yes	up	0.08	0.13	0.09	1.62	1.93	0.32	0.1	1.29
MSTRG.13188		-	10.416	3.380781376	1.70E-13	2.55E-12	yes	up	0.87	0.69	0.15	1.21	1.38	1.22	0.57	1.27
ENSMUSG00000028885	Smpdl3b	sphingomyelin phosphodiesterase, acid-like 3B [Source:MGI Symbol;Acc:MGI:1916022]	15.516	3.955647763	1.93E-13	2.88E-12	yes	up	0.23	0.17	0.17	0.98	0.85	0.25	0.19	0.693333333
ENSMUSG00000021423	Ly86	lymphocyte antigen 86 [Source:MGI Symbol;Acc:MGI:1321404]	15.948	3.995280499	1.97E-13	2.94E-12	yes	up	1.23	0.66	0.4	2.14	5.32	1.07	0.763333333	2.843333333
MSTRG.19267		-	16.01	4.000925505	2.74E-13	4.05E-12	yes	up	1.35	4.75	5.17	23.52	14.2	8.23	3.756666667	15.31666667
ENSMUSG00000019850	Tnfaip3	tumor necrosis factor, alpha-induced protein 3 [Source:MGI Symbol;Acc:MGI:1196377]	11.426	3.514275227	2.75E-13	4.07E-12	yes	up	0.24	0.38	0.06	0.76	0.44	0.25	0.226666667	0.483333333
ENSMUSG00000029369	Afm	afamin [Source:MGI Symbol;Acc:MGI:2429409]	0.054	-4.223100307	2.76E-13	4.08E-12	yes	down	9.99	10.42	6.06	0.05	0.02	0.23	8.823333333	0.1
ENSMUSG00000032327	Stra6	stimulated by retinoic acid gene 6 [Source:MGI Symbol;Acc:MGI:107742]	13.927	3.79981531	3.38E-13	4.94E-12	yes	up	0.13	0.1	0.05	0.29	0.48	0.22	0.093333333	0.33
ENSMUSG00000010142	Tnfrsf13b	tumor necrosis factor receptor superfamily, member 13b [Source:MGI Symbol;Acc:MGI:1889411]	19.439	4.280875624	3.71E-13	5.39E-12	yes	up	0.36	0.14	0.01	0.81	0.88	0.28	0.17	0.656666667
ENSMUSG00000057191	AB124611	cDNA sequence AB124611 [Source:MGI Symbol;Acc:MGI:3043001]	26.987	4.754180509	5.41E-13	7.78E-12	yes	up	0.27	0.28	0.14	0.82	2.96	0.55	0.23	1.443333333
ENSMUSG00000035373	Ccl7	chemokine (C-C motif) ligand 7 [Source:MGI Symbol;Acc:MGI:99512]	565.355	9.1430132	6.74E-13	9.60E-12	yes	up	0	0	0	1.58	2.13	0.94	0	1.55
ENSMUSG00000058927	Gm10053	predicted gene 10053 [Source:MGI Symbol;Acc:MGI:3704493]	0.099	-3.333562036	6.91E-13	9.82E-12	yes	down	154.86	157.86	51.52	2.79	1.05	3.44	121.4133333	2.426666667
ENSMUSG00000079575	Rbpsuh-rs3	recombining binding protein suppressor of hairless (Drosophila), related sequence 3 [Source:MGI Symbol;Acc:MGI:96525]	31.664	4.984763168	7.58E-13	1.07E-11	yes	up	0.04	0.1	0.13	0.64	1.15	0.4	0.09	0.73
ENSMUSG00000040978	Gm11992	predicted gene 11992 [Source:MGI Symbol;Acc:MGI:3651127]	0.072	-3.794763028	8.53E-13	1.20E-11	yes	down	6.05	4.63	3.18	0.17	0.06	0	4.62	0.076666667
ENSMUSG00000008845	Cd163	CD163 antigen [Source:MGI Symbol;Acc:MGI:2135946]	18.257	4.19034222	9.28E-13	1.30E-11	yes	up	0.2	0.27	0.1	0.58	1.16	0.7	0.19	0.813333333
ENSMUSG00000013611	Snx31	sorting nexin 31 [Source:MGI Symbol;Acc:MGI:1913946]	0.003	-8.614750699	1.12E-12	1.57E-11	yes	down	9.37	7.42	5.14	0	0	0	7.31	0
ENSMUSG00000071713	Csf2rb	colony stimulating factor 2 receptor, beta, low-affinity (granulocyte-macrophage) [Source:MGI Symbol;Acc:MGI:1339759]	19.316	4.271759211	1.16E-12	1.62E-11	yes	up	0.06	0.1	0.04	0.23	0.16	0.38	0.066666667	0.256666667
ENSMUSG00000049122	Frmd3	FERM domain containing 3 [Source:MGI Symbol;Acc:MGI:2442466]	24.77	4.630521227	1.22E-12	1.70E-11	yes	up	3.31	8.63	23.86	89.92	185.7	62.23	11.93333333	112.6166667
ENSMUSG00000025804	Ccr1	chemokine (C-C motif) receptor 1 [Source:MGI Symbol;Acc:MGI:104618]	36.003	5.170056642	1.33E-12	1.85E-11	yes	up	0.08	0.08	0	0.3	0.77	0.19	0.053333333	0.42
ENSMUSG00000044444	Pfn3	profilin 3 [Source:MGI Symbol;Acc:MGI:2178800]	0.021	-5.551792633	1.39E-12	1.93E-11	yes	down	58.2	67.79	45.11	0	0.68	0.22	57.03333333	0.3
ENSMUSG00000110755	AC151971.2	-	0.013	-6.289254947	1.47E-12	2.03E-11	yes	down	19.06	23.62	19.19	0.24	0	0	20.62333333	0.08
ENSMUSG00000019762	Iyd	iodotyrosine deiodinase [Source:MGI Symbol;Acc:MGI:1917587]	0.087	-3.523594396	1.54E-12	2.11E-11	yes	down	14.43	12.11	5.7	0.32	0.32	0	10.74666667	0.213333333
ENSMUSG00000005547	Cyp2a5	cytochrome P450, family 2, subfamily a, polypeptide 5 [Source:MGI Symbol;Acc:MGI:88597]	0.087	-3.528742727	1.89E-12	2.58E-11	yes	down	12.54	10.64	20.61	0.66	0.2	1.71	14.59666667	0.856666667
ENSMUSG00000031264	Btk	Bruton agammaglobulinemia tyrosine kinase [Source:MGI Symbol;Acc:MGI:88216]	45.003	5.491946496	1.89E-12	2.58E-11	yes	up	0.3	0.05	0.06	0.47	0.89	0.11	0.136666667	0.49
MSTRG.28167		-	121.069	6.919686647	2.07E-12	2.82E-11	yes	up	1.39	0.24	1.21	6.33	43.53	25.37	0.946666667	25.07666667
ENSMUSG00000039126	Prune2	prune homolog 2 [Source:MGI Symbol;Acc:MGI:1925004]	33.316	5.058161547	2.17E-12	2.95E-11	yes	up	0.01	0.02	0	0.09	0.09	0.03	0.01	0.07
ENSMUSG00000006649	Nphs1	nephrosis 1, nephrin [Source:MGI Symbol;Acc:MGI:1859637]	0.014	-6.188323111	2.24E-12	3.04E-11	yes	down	7	6.01	4.01	0.01	0.01	0	5.673333333	0.006666667
ENSMUSG00000036896	C1qc	complement component 1, q subcomponent, C chain [Source:MGI Symbol;Acc:MGI:88225]	11.84	3.565612709	2.63E-12	3.55E-11	yes	up	3.13	3.58	0.92	6.28	11	1.9	2.543333333	6.393333333
MSTRG.23320		-	13.092	3.710572575	2.66E-12	3.57E-11	yes	up	0.71	0.42	0.83	1.05	2.29	2.55	0.653333333	1.963333333
ENSMUSG00000026442	Nfasc	neurofascin [Source:MGI Symbol;Acc:MGI:104753]	0.065	-3.934637139	2.67E-12	3.59E-11	yes	down	11.26	7.47	9.02	0.1	0.11	0.14	9.25	0.116666667
ENSMUSG00000105703	Gm43305	predicted gene 43305 [Source:MGI Symbol;Acc:MGI:5663442]	5543.251	12.43651657	2.70E-12	3.62E-11	yes	up	0.21	0	0.02	1.33	238.41	126.41	0.076666667	122.05
ENSMUSG00000108652	0610006L08Rik	RIKEN cDNA 0610006L08 gene [Source:MGI Symbol;Acc:MGI:1923503]	0.045	-4.466527641	2.73E-12	3.65E-11	yes	down	19.25	11.1	4.36	0.2	0.04	0.09	11.57	0.11
ENSMUSG00000035095	Fam167a	family with sequence similarity 167, member A [Source:MGI Symbol;Acc:MGI:3606565]	18.16	4.182680385	3.07E-12	4.10E-11	yes	up	0.08	0.06	0.02	0.16	0.36	0.14	0.053333333	0.22
ENSMUSG00000042988	Notum	notum pectinacetylesterase homolog (Drosophila) [Source:MGI Symbol;Acc:MGI:1924833]	0.003	-8.423989721	3.43E-12	4.56E-11	yes	down	8.16	8.12	4.96	0	0	0	7.08	0
ENSMUSG00000044819	Oxgr1	oxoglutarate (alpha-ketoglutarate) receptor 1 [Source:MGI Symbol;Acc:MGI:2685145]	0.047	-4.399000019	3.76E-12	4.97E-11	yes	down	2.22	2.55	1.52	0.03	0	0.04	2.096666667	0.023333333
ENSMUSG00000081855	Rpl17-ps5	ribosomal protein L17, pseudogene 5 [Source:MGI Symbol;Acc:MGI:3704246]	342.661	8.420639453	4.48E-12	5.86E-11	yes	up	0.33	0.23	0.3	0	44.03	30.37	0.286666667	24.8
ENSMUSG00000000440	Pparg	peroxisome proliferator activated receptor gamma [Source:MGI Symbol;Acc:MGI:97747]	13.433	3.747713503	4.71E-12	6.15E-11	yes	up	0.14	0.19	0.19	0.49	0.67	0.54	0.173333333	0.566666667
MSTRG.7541		-	39.415	5.300683953	4.85E-12	6.34E-11	yes	up	0.52	0.46	0	1.01	2.49	3.75	0.326666667	2.416666667
ENSMUSG00000030074	Gxylt2	glucoside xylosyltransferase 2 [Source:MGI Symbol;Acc:MGI:2682940]	15.667	3.969638031	4.97E-12	6.48E-11	yes	up	0.48	0.53	0.04	0.49	0.57	0.69	0.35	0.583333333
ENSMUSG00000043157	Arl11	ADP-ribosylation factor-like 11 [Source:MGI Symbol;Acc:MGI:2444054]	21.03	4.394377074	5.01E-12	6.52E-11	yes	up	0.09	0.21	0.05	0.52	0.79	0.38	0.116666667	0.563333333
ENSMUSG00000010435	Spaca7	sperm acrosome associated 7 [Source:MGI Symbol;Acc:MGI:1925884]	465.477	8.86256486	5.31E-12	6.89E-11	yes	up	0	0	0	1.53	1.34	1.27	0	1.38
ENSMUSG00000026368	F13b	coagulation factor XIII, beta subunit [Source:MGI Symbol;Acc:MGI:88379]	0.003	-8.370045963	5.80E-12	7.50E-11	yes	down	11.15	8.72	4.23	0	0.02	0	8.033333333	0.006666667
ENSMUSG00000007888	Crlf1	cytokine receptor-like factor 1 [Source:MGI Symbol;Acc:MGI:1340030]	19.889	4.313903982	5.90E-12	7.62E-11	yes	up	0.1	0.17	0.05	0.68	0.51	0.49	0.106666667	0.56
ENSMUSG00000026475	Rgs16	regulator of G-protein signaling 16 [Source:MGI Symbol;Acc:MGI:108407]	67.101	6.068268628	6.30E-12	8.10E-11	yes	up	0.03	0.03	0	0.3	0.31	0.33	0.02	0.313333333
MSTRG.24657		-	12.344	3.625716601	6.59E-12	8.46E-11	yes	up	0.31	0.18	0.15	0.36	1.36	0.4	0.213333333	0.706666667
ENSMUSG00000079419	Ms4a6c	membrane-spanning 4-domains, subfamily A, member 6C [Source:MGI Symbol;Acc:MGI:2385644]	34.052	5.08968531	6.84E-12	8.77E-11	yes	up	0.33	0.23	0.02	1.71	2.93	0.46	0.193333333	1.7
ENSMUSG00000041698	Slco1a1	solute carrier organic anion transporter family, member 1a1 [Source:MGI Symbol;Acc:MGI:1351891]	0.006	-7.467357494	6.98E-12	8.94E-11	yes	down	57.38	60.8	33.51	0	0.1	0.04	50.56333333	0.046666667
ENSMUSG00000026840	Lamc3	laminin gamma 3 [Source:MGI Symbol;Acc:MGI:1344394]	0.057	-4.135000621	7.78E-12	9.94E-11	yes	down	1.32	1.14	0.95	0.01	0.01	0.02	1.136666667	0.013333333
ENSMUSG00000095079	Igha	immunoglobulin heavy constant alpha [Source:MGI Symbol;Acc:MGI:96444]	0.006	-7.319473147	8.01E-12	1.02E-10	yes	down	163.54	216.24	26.66	0.07	0.47	0.04	135.48	0.193333333
MSTRG.19348		-	64.236	6.00530891	8.34E-12	1.06E-10	yes	up	0.77	0.27	0.1	3.17	7.91	4.63	0.38	5.236666667
ENSMUSG00000100969	1700030N03Rik	RIKEN cDNA 1700030N03 gene [Source:MGI Symbol;Acc:MGI:1917261]	40.456	5.338274631	9.94E-12	1.25E-10	yes	up	0.03	0.11	0.02	1.03	0.48	0.08	0.053333333	0.53
MSTRG.8146		-	468.702	8.872526387	1.09E-11	1.36E-10	yes	up	0	0	0	0.57	1.3	0.73	0	0.866666667
ENSMUSG00000078771	Evi2a	ecotropic viral integration site 2a [Source:MGI Symbol;Acc:MGI:95458]	13.571	3.76240294	1.10E-11	1.38E-10	yes	up	0.84	0.33	0.11	1.16	1.09	0.57	0.426666667	0.94
ENSMUSG00000034226	Rhov	ras homolog family member V [Source:MGI Symbol;Acc:MGI:2444227]	0.089	-3.490931314	1.11E-11	1.39E-10	yes	down	4.53	5.31	4.6	0.08	0.13	0.09	4.813333333	0.1
ENSMUSG00000021091	Serpina3n	serine (or cysteine) peptidase inhibitor, clade A, member 3N [Source:MGI Symbol;Acc:MGI:105045]	55.279	5.788669174	1.20E-11	1.49E-10	yes	up	0	0.12	0	0.78	0.45	0.32	0.04	0.516666667
ENSMUSG00000031722	Hp	haptoglobin [Source:MGI Symbol;Acc:MGI:96211]	25.26	4.65880338	1.26E-11	1.56E-10	yes	up	0.27	1.69	0.57	2.45	3.68	4.03	0.843333333	3.386666667
MSTRG.18232		-	20.528	4.359547639	1.47E-11	1.82E-10	yes	up	0.07	0.09	0.13	0.36	0.34	0.65	0.096666667	0.45
ENSMUSG00000005640	Insrr	insulin receptor-related receptor [Source:MGI Symbol;Acc:MGI:1346037]	0.066	-3.916863035	1.54E-11	1.91E-10	yes	down	3.87	5.71	4.59	0.09	0	0.11	4.723333333	0.066666667
ENSMUSG00000062515	Fabp4	fatty acid binding protein 4, adipocyte [Source:MGI Symbol;Acc:MGI:88038]	10.711	3.42099774	1.56E-11	1.94E-10	yes	up	21.6	20.15	7.27	25.06	18.75	58.41	16.34	34.07333333
MSTRG.25464		-	133.662	7.06244108	1.61E-11	1.99E-10	yes	up	0.03	0.05	0.03	0.16	1.99	0.74	0.036666667	0.963333333
ENSMUSG00000070691	Runx3	runt related transcription factor 3 [Source:MGI Symbol;Acc:MGI:102672]	33.006	5.044649464	1.92E-11	2.36E-10	yes	up	0.03	0.03	0.02	0.18	0.32	0.09	0.026666667	0.196666667
MSTRG.1710		-	22.817	4.512039994	2.01E-11	2.46E-10	yes	up	0.16	1.18	0.56	1.21	5.71	2.87	0.633333333	3.263333333
ENSMUSG00000049971	Glt1d1	glycosyltransferase 1 domain containing 1 [Source:MGI Symbol;Acc:MGI:2442755]	0.081	-3.621015425	2.29E-11	2.79E-10	yes	down	2.37	2.41	1.74	0.01	0.04	0.07	2.173333333	0.04
ENSMUSG00000058818	Pirb	paired Ig-like receptor B [Source:MGI Symbol;Acc:MGI:894311]	11.273	3.49477082	2.56E-11	3.10E-10	yes	up	0.14	0.27	0.03	0.33	0.46	0.28	0.146666667	0.356666667
ENSMUSG00000004609	Cd33	CD33 antigen [Source:MGI Symbol;Acc:MGI:99440]	11.234	3.489797006	2.76E-11	3.32E-10	yes	up	0.08	0.1	0.07	0.25	0.22	0.3	0.083333333	0.256666667
ENSMUSG00000097417	Gm26669	predicted gene, 26669 [Source:MGI Symbol;Acc:MGI:5477163]	721.666	9.495187008	2.81E-11	3.37E-10	yes	up	0	0	0	0.11	0.93	0.84	0	0.626666667
ENSMUSG00000030317	Timp4	tissue inhibitor of metalloproteinase 4 [Source:MGI Symbol;Acc:MGI:109125]	72.267	6.17526319	2.87E-11	3.43E-10	yes	up	0	0.02	0.01	0.14	0.09	0.28	0.01	0.17
ENSMUSG00000063796	Slc22a8	solute carrier family 22 (organic anion transporter), member 8 [Source:MGI Symbol;Acc:MGI:1336187]	0.01	-6.665526787	2.90E-11	3.47E-10	yes	down	59.46	75.1	32.4	0.1	0.01	0.21	55.65333333	0.106666667
MSTRG.2309		-	45.799	5.517236305	2.98E-11	3.55E-10	yes	up	1.37	0.41	0.11	3.8	8.7	5.18	0.63	5.893333333
ENSMUSG00000022445	Cyp2d26	cytochrome P450, family 2, subfamily d, polypeptide 26 [Source:MGI Symbol;Acc:MGI:1923529]	0.035	-4.82964919	3.03E-11	3.60E-10	yes	down	9.06	6.65	2.63	0.04	0	0.09	6.113333333	0.043333333
ENSMUSG00000022439	Parvg	parvin, gamma [Source:MGI Symbol;Acc:MGI:2158329]	11.852	3.567047466	3.24E-11	3.85E-10	yes	up	0.25	0.14	0.18	2.02	0.74	0.18	0.19	0.98
ENSMUSG00000018927	Ccl6	chemokine (C-C motif) ligand 6 [Source:MGI Symbol;Acc:MGI:98263]	10.823	3.435979053	3.24E-11	3.85E-10	yes	up	0.78	0.67	0.52	1.84	2.44	0.42	0.656666667	1.566666667
ENSMUSG00000035031	C8a	complement component 8, alpha polypeptide [Source:MGI Symbol;Acc:MGI:2668347]	0.029	-5.118346768	3.49E-11	4.13E-10	yes	down	7.72	4.32	6.39	0.01	0.07	0	6.143333333	0.026666667
MSTRG.20245		-	17.727	4.147863319	3.97E-11	4.68E-10	yes	up	0.85	3.7	1.35	8.08	4.29	10.6	1.966666667	7.656666667
ENSMUSG00000050074	Spink8	serine peptidase inhibitor, Kazal type 8 [Source:MGI Symbol;Acc:MGI:1925959]	0.058	-4.095751003	4.44E-11	5.21E-10	yes	down	15.7	24.75	8.6	0.29	0.13	0.22	16.35	0.213333333
ENSMUSG00000112713	AC122301.3	-	0.004	-8.03310698	4.85E-11	5.66E-10	yes	down	30.42	27.61	22.64	0	0	0	26.89	0
ENSMUSG00000039252	Lgi2	leucine-rich repeat LGI family, member 2 [Source:MGI Symbol;Acc:MGI:2180196]	31.642	4.983760503	5.17E-11	6.02E-10	yes	up	0.04	0.01	0.01	0.09	0.09	0.14	0.02	0.106666667
ENSMUSG00000024672	Ms4a7	membrane-spanning 4-domains, subfamily A, member 7 [Source:MGI Symbol;Acc:MGI:1918846]	23.315	4.543157708	5.73E-11	6.65E-10	yes	up	0.31	0.28	0.06	0.59	1.18	0.25	0.216666667	0.673333333
ENSMUSG00000027996	Sfrp2	secreted frizzled-related protein 2 [Source:MGI Symbol;Acc:MGI:108078]	0.004	-7.890231243	6.42E-11	7.42E-10	yes	down	7.32	7.87	5.31	0.02	0	0	6.833333333	0.006666667
ENSMUSG00000031101	Sash3	SAM and SH3 domain containing 3 [Source:MGI Symbol;Acc:MGI:1921381]	18.086	4.176770509	6.83E-11	7.87E-10	yes	up	0.09	0.18	0.04	0.38	0.76	0.16	0.103333333	0.433333333
ENSMUSG00000015852	Fcrls	Fc receptor-like S, scavenger receptor [Source:MGI Symbol;Acc:MGI:1933397]	153.301	7.26022231	1.03E-10	1.16E-09	yes	up	0.02	0.02	0	0.7	0.37	0.43	0.013333333	0.5
ENSMUSG00000033327	Tnxb	tenascin XB [Source:MGI Symbol;Acc:MGI:1932137]	0.038	-4.704542774	1.26E-10	1.41E-09	yes	down	0.63	0.59	0.32	0	0.01	0	0.513333333	0.003333333
ENSMUSG00000024912	Fosl1	fos-like antigen 1 [Source:MGI Symbol;Acc:MGI:107179]	150.526	7.233871598	1.28E-10	1.44E-09	yes	up	0.02	0.02	0	0.46	0.71	0.41	0.013333333	0.526666667
ENSMUSG00000043144	Aqp6	aquaporin 6 [Source:MGI Symbol;Acc:MGI:1341204]	0.003	-8.223085004	1.29E-10	1.44E-09	yes	down	5.46	4.67	1.45	0	0	0	3.86	0
ENSMUSG00000086010	Gm15318	predicted gene 15318 [Source:MGI Symbol;Acc:MGI:3705106]	0.06	-4.055524911	1.32E-10	1.48E-09	yes	down	6.8	5.82	4.99	0.26	0.07	0	5.87	0.11
ENSMUSG00000031445	Proz	protein Z, vitamin K-dependent plasma glycoprotein [Source:MGI Symbol;Acc:MGI:1860488]	0.018	-5.817786295	1.33E-10	1.48E-09	yes	down	2.53	2.46	2.2	0	0.03	0	2.396666667	0.01
ENSMUSG00000031506	Ptpn7	protein tyrosine phosphatase, non-receptor type 7 [Source:MGI Symbol;Acc:MGI:2156893]	28.379	4.826776778	1.36E-10	1.51E-09	yes	up	0.08	0.03	0	0.26	0.38	0.13	0.036666667	0.256666667
ENSMUSG00000030255	Sspn	sarcospan [Source:MGI Symbol;Acc:MGI:1353511]	10.747	3.425805948	1.54E-10	1.70E-09	yes	up	63.74	106.24	140.44	558.44	391.72	86.66	103.4733333	345.6066667
MSTRG.193		-	11.04	3.464666363	1.72E-10	1.89E-09	yes	up	0.2	0.14	0.08	0.18	0.52	0.32	0.14	0.34
ENSMUSG00000036356	Csgalnact1	chondroitin sulfate N-acetylgalactosaminyltransferase 1 [Source:MGI Symbol;Acc:MGI:2442354]	0.071	-3.824068625	1.87E-10	2.04E-09	yes	down	2.25	1.44	1.12	0.03	0.03	0.02	1.603333333	0.026666667
ENSMUSG00000018623	Mmp7	matrix metallopeptidase 7 [Source:MGI Symbol;Acc:MGI:103189]	377.449	8.560137187	1.90E-10	2.07E-09	yes	up	0	0	0	0.97	0.85	0.27	0	0.696666667
ENSMUSG00000037731	Themis2	thymocyte selection associated family member 2 [Source:MGI Symbol;Acc:MGI:2446213]	13.049	3.705873197	1.94E-10	2.11E-09	yes	up	0.2	0.23	0.09	0.38	1.05	0.18	0.173333333	0.536666667
ENSMUSG00000037347	Chst7	carbohydrate (N-acetylglucosamino) sulfotransferase 7 [Source:MGI Symbol;Acc:MGI:1891767]	0.009	-6.850688451	1.98E-10	2.15E-09	yes	down	7.42	6.58	2.81	0.03	0	0	5.603333333	0.01
ENSMUSG00000054052	Rdh19	retinol dehydrogenase 19 [Source:MGI Symbol;Acc:MGI:2678390]	0.035	-4.833902038	2.04E-10	2.21E-09	yes	down	1.76	0.95	0.88	0.01	0.02	0	1.196666667	0.01
ENSMUSG00000015083	C8g	complement component 8, gamma polypeptide [Source:MGI Symbol;Acc:MGI:88237]	0.046	-4.439132291	2.05E-10	2.23E-09	yes	down	16.24	7.41	9.5	0.31	0	0.45	11.05	0.253333333
ENSMUSG00000096958	Gm26573	predicted gene, 26573 [Source:MGI Symbol;Acc:MGI:5477067]	32.684	5.030497098	2.22E-10	2.41E-09	yes	up	4.14	2.73	2.18	6.27	17.7	39.61	3.016666667	21.19333333
ENSMUSG00000030364	Clec2h	C-type lectin domain family 2, member h [Source:MGI Symbol;Acc:MGI:2136934]	0.05	-4.310491433	2.38E-10	2.58E-09	yes	down	5.13	6.02	2.28	0	0.05	0.1	4.476666667	0.05
ENSMUSG00000035580	Kcnh8	potassium voltage-gated channel, subfamily H (eag-related), member 8 [Source:MGI Symbol;Acc:MGI:2445160]	570.665	9.156500517	2.59E-10	2.79E-09	yes	up	0	0	0	0.67	0.11	1.09	0	0.623333333
ENSMUSG00000053303	Slc22a26	solute carrier family 22 (organic cation transporter), member 26 [Source:MGI Symbol;Acc:MGI:2385316]	0.071	-3.813516167	2.61E-10	2.81E-09	yes	down	2.69	1.86	1.13	0.05	0	0.04	1.893333333	0.03
ENSMUSG00000103865	Gm37416	predicted gene, 37416 [Source:MGI Symbol;Acc:MGI:5610644]	79.743	6.317283361	2.78E-10	2.99E-09	yes	up	0	0	0.54	6.41	2.09	2.73	0.18	3.743333333
MSTRG.31461		-	377.291	8.559533452	2.84E-10	3.05E-09	yes	up	0	0	0	0.89	2.85	1.69	0	1.81
ENSMUSG00000037428	Vgf	VGF nerve growth factor inducible [Source:MGI Symbol;Acc:MGI:1343180]	352.08	8.459760304	3.23E-10	3.45E-09	yes	up	0	0	0	0.31	0.14	0.19	0	0.213333333
ENSMUSG00000036198	Arhgap36	Rho GTPase activating protein 36 [Source:MGI Symbol;Acc:MGI:1922654]	420.643	8.716450814	3.64E-10	3.84E-09	yes	up	0	0	0	0.15	0.17	0.32	0	0.213333333
ENSMUSG00000034457	Eda2r	ectodysplasin A2 receptor [Source:MGI Symbol;Acc:MGI:2442860]	20.324	4.345094356	3.91E-10	4.11E-09	yes	up	0.02	0.06	0.05	0.17	0.31	0.07	0.043333333	0.183333333
ENSMUSG00000099401	Gm28375	predicted gene 28375 [Source:MGI Symbol;Acc:MGI:5579081]	29.997	4.906760442	3.96E-10	4.17E-09	yes	up	0.04	0.04	0.03	0.21	0.57	0.07	0.036666667	0.283333333
ENSMUSG00000038217	Tlcd2	TLC domain containing 2 [Source:MGI Symbol;Acc:MGI:1917141]	0.075	-3.746536714	4.06E-10	4.27E-09	yes	down	8.82	7.4	3.66	0.08	0.04	0.21	6.626666667	0.11
MSTRG.15655		-	38.962	5.284003267	4.08E-10	4.28E-09	yes	up	0.23	0.09	0.25	1.11	3.96	0.71	0.19	1.926666667
ENSMUSG00000074435	Smcp	sperm mitochondria-associated cysteine-rich protein [Source:MGI Symbol;Acc:MGI:96945]	0.009	-6.754796123	4.16E-10	4.35E-09	yes	down	12.76	22.27	13.66	0	0	0.11	16.23	0.036666667
ENSMUSG00000085720	Gm7854	predicted gene 7854 [Source:MGI Symbol;Acc:MGI:3648234]	46.405	5.53619627	4.23E-10	4.43E-09	yes	up	0.67	0.12	0.58	2.38	9.36	3.5	0.456666667	5.08
ENSMUSG00000029659	Medag	mesenteric estrogen dependent adipogenesis [Source:MGI Symbol;Acc:MGI:1917967]	20.963	4.389758645	4.46E-10	4.65E-09	yes	up	0.03	0.09	0.07	0.49	0.27	0.13	0.063333333	0.296666667
MSTRG.25342		-	11.34	3.503307626	4.75E-10	4.93E-09	yes	up	0.17	0.08	0.09	0.42	0.39	0.08	0.113333333	0.296666667
MSTRG.11944		-	42.656	5.414683654	5.05E-10	5.22E-09	yes	up	0.03	0.01	0.02	0.3	0.31	0.04	0.02	0.216666667
MSTRG.4186		-	0.005	-7.678564066	5.36E-10	5.53E-09	yes	down	1.35	1.85	1.11	0	0	0	1.436666667	0
ENSMUSG00000074469	Gm15348	predicted gene 15348 [Source:MGI Symbol;Acc:MGI:3642533]	0.053	-4.242657977	5.40E-10	5.56E-09	yes	down	5.69	3.94	5.1	0.04	0.04	0.02	4.91	0.033333333
ENSMUSG00000055114	Anxa13	annexin A13 [Source:MGI Symbol;Acc:MGI:1917037]	0.021	-5.55340543	5.73E-10	5.89E-09	yes	down	5.3	5.21	2.57	0.04	0	0.02	4.36	0.02
ENSMUSG00000006574	Slc4a1	solute carrier family 4 (anion exchanger), member 1 [Source:MGI Symbol;Acc:MGI:109393]	0.059	-4.088580762	6.40E-10	6.55E-09	yes	down	2.09	1.83	0.79	0.01	0.01	0.04	1.57	0.02
MSTRG.21413		-	391.589	8.613195763	7.17E-10	7.30E-09	yes	up	0.29	0.04	0.17	1.06	40.66	6.41	0.166666667	16.04333333
ENSMUSG00000035004	Igsf6	immunoglobulin superfamily, member 6 [Source:MGI Symbol;Acc:MGI:1891393]	13.205	3.723037938	7.57E-10	7.66E-09	yes	up	0.22	0.08	0.12	0.45	0.71	0.18	0.14	0.446666667
ENSMUSG00000041762	Gpr155	G protein-coupled receptor 155 [Source:MGI Symbol;Acc:MGI:1915776]	0.085	-3.550219232	7.62E-10	7.71E-09	yes	down	5.63	4.52	2.36	0.07	0.11	0	4.17	0.06
ENSMUSG00000080859	Rpl10-ps1	ribosomal protein L10, pseudogene 1 [Source:MGI Symbol;Acc:MGI:3650909]	0.003	-8.37711123	7.91E-10	7.99E-09	yes	down	39.88	31.87	3.52	0	0	0	25.09	0
ENSMUSG00000079227	Ccr5	chemokine (C-C motif) receptor 5 [Source:MGI Symbol;Acc:MGI:107182]	11.463	3.518869922	8.13E-10	8.19E-09	yes	up	0.83	0.1	0.05	0.34	0.46	0.07	0.326666667	0.29
ENSMUSG00000097312	Gm26870	predicted gene, 26870 [Source:MGI Symbol;Acc:MGI:5477364]	13.929	3.800014378	8.37E-10	8.42E-09	yes	up	0.62	0.38	0.87	0.79	3.24	2.35	0.623333333	2.126666667
ENSMUSG00000044811	Cd300c2	CD300C molecule 2 [Source:MGI Symbol;Acc:MGI:2153249]	17.312	4.113690269	8.38E-10	8.43E-09	yes	up	0.39	0.34	0.1	1.1	1.9	0.25	0.276666667	1.083333333
ENSMUSG00000097582	Gm26527	predicted gene, 26527 [Source:MGI Symbol;Acc:MGI:5477021]	0.076	-3.709759325	1.02E-09	1.02E-08	yes	down	10.12	9.62	1.83	0.08	0.21	0.06	7.19	0.116666667
ENSMUSG00000012519	Mlkl	mixed lineage kinase domain-like [Source:MGI Symbol;Acc:MGI:1921818]	11.193	3.484469736	1.06E-09	1.06E-08	yes	up	0.21	0.17	0.23	0.43	0.74	0.61	0.203333333	0.593333333
ENSMUSG00000095562	Gm21887	predicted gene, 21887 [Source:MGI Symbol;Acc:MGI:5434051]	10.605	3.406615583	1.15E-09	1.14E-08	yes	up	3.9	8.76	9.57	13.71	6.84	24.25	7.41	14.93333333
MSTRG.8436		-	246.352	7.944578745	1.27E-09	1.25E-08	yes	up	0.12	0.02	0	3.68	1.43	1.47	0.046666667	2.193333333
ENSMUSG00000046245	Pilra	paired immunoglobin-like type 2 receptor alpha [Source:MGI Symbol;Acc:MGI:2450529]	22.376	4.483870549	1.40E-09	1.38E-08	yes	up	0.08	0.08	0.03	0.22	0.24	0.47	0.063333333	0.31
ENSMUSG00000094686	Ccl21a	chemokine (C-C motif) ligand 21A (serine) [Source:MGI Symbol;Acc:MGI:1349183]	0.065	-3.937105713	1.42E-09	1.40E-08	yes	down	7.99	10.92	5.76	0.1	0.11	0.16	8.223333333	0.123333333
ENSMUSG00000109849	Gm45645	predicted gene 45645 [Source:MGI Symbol;Acc:MGI:5791481]	0.005	-7.614714677	1.47E-09	1.44E-08	yes	down	5.14	2.74	3.17	0	0	0	3.683333333	0
MSTRG.1468		-	41.365	5.370350896	1.49E-09	1.46E-08	yes	up	0.67	0	0	2.29	1.68	1.94	0.223333333	1.97
ENSMUSG00000040936	Ulk4	unc-51-like kinase 4 [Source:MGI Symbol;Acc:MGI:1921622]	14.933	3.900448036	1.55E-09	1.51E-08	yes	up	0.17	0.08	1.59	7.5	2.74	3.62	0.613333333	4.62
ENSMUSG00000089712	Gm15889	predicted gene 15889 [Source:MGI Symbol;Acc:MGI:3802159]	0.05	-4.325037564	1.61E-09	1.57E-08	yes	down	9.13	6.11	5.6	0	0.01	0.19	6.946666667	0.066666667
ENSMUSG00000043832	Clec4a3	C-type lectin domain family 4, member a3 [Source:MGI Symbol;Acc:MGI:1920399]	14.284	3.83631035	1.65E-09	1.61E-08	yes	up	0.37	0.36	0.11	1.52	1.21	0.28	0.28	1.003333333
ENSMUSG00000063412	Gm10131	predicted pseudogene 10131 [Source:MGI Symbol;Acc:MGI:3704308]	11.421	3.513664227	1.78E-09	1.72E-08	yes	up	0.72	0.65	1.8	2.91	4.64	1.97	1.056666667	3.173333333
ENSMUSG00000053168	9030619P08Rik	RIKEN cDNA 9030619P08 gene [Source:MGI Symbol;Acc:MGI:3612405]	0.005	-7.561927415	1.85E-09	1.78E-08	yes	down	8.67	12.37	4.19	0	0	0	8.41	0
ENSMUSG00000052396	Mogat2	monoacylglycerol O-acyltransferase 2 [Source:MGI Symbol;Acc:MGI:2663253]	0.044	-4.505322376	1.91E-09	1.84E-08	yes	down	5.01	3.34	2.24	0.04	0	0.67	3.53	0.236666667
ENSMUSG00000035352	Ccl12	chemokine (C-C motif) ligand 12 [Source:MGI Symbol;Acc:MGI:108224]	72.722	6.184327503	2.13E-09	2.05E-08	yes	up	0.4	0	0	2.82	2.38	1.17	0.133333333	2.123333333
ENSMUSG00000015093	Clic3	chloride intracellular channel 3 [Source:MGI Symbol;Acc:MGI:1916704]	0.006	-7.393817051	2.26E-09	2.16E-08	yes	down	9.27	8.71	6.14	0	0	0	8.04	0
MSTRG.11148		-	0.005	-7.52042864	2.37E-09	2.27E-08	yes	down	1.76	0.99	1.1	0	0	0	1.283333333	0
MSTRG.28084		-	72.235	6.174621391	2.86E-09	2.71E-08	yes	up	0	0.49	0.48	1.53	1.74	1.55	0.323333333	1.606666667
ENSMUSG00000035775	Krt20	keratin 20 [Source:MGI Symbol;Acc:MGI:1914059]	156.224	7.287468763	2.89E-09	2.74E-08	yes	up	0	0.04	0	0.86	0.23	0.3	0.013333333	0.463333333
ENSMUSG00000021943	Gdf10	growth differentiation factor 10 [Source:MGI Symbol;Acc:MGI:95684]	0.063	-3.994370434	3.28E-09	3.08E-08	yes	down	2.93	2.93	1.24	0.05	0	0.04	2.366666667	0.03
ENSMUSG00000000049	Apoh	apolipoprotein H [Source:MGI Symbol;Acc:MGI:88058]	0.084	-3.574899361	3.41E-09	3.20E-08	yes	down	5.57	8.62	4.07	0.06	0.07	0.2	6.086666667	0.11
MSTRG.20095		-	157.557	7.299726646	3.42E-09	3.20E-08	yes	up	0.13	0.02	0.52	7.43	18.77	5.91	0.223333333	10.70333333
ENSMUSG00000028834	Trim63	tripartite motif-containing 63 [Source:MGI Symbol;Acc:MGI:2447992]	0.006	-7.316825786	3.43E-09	3.22E-08	yes	down	14.16	8.61	7.44	0	0	0.03	10.07	0.01
ENSMUSG00000004415	Col26a1	collagen, type XXVI, alpha 1 [Source:MGI Symbol;Acc:MGI:2155345]	0.037	-4.737989183	3.90E-09	3.63E-08	yes	down	1.95	2.32	1.86	0.02	0	0.03	2.043333333	0.016666667
ENSMUSG00000029915	Clec5a	C-type lectin domain family 5, member a [Source:MGI Symbol;Acc:MGI:1345151]	16.224	4.020058513	3.91E-09	3.64E-08	yes	up	0.21	0.21	0.04	0.42	0.49	0.2	0.153333333	0.37
ENSMUSG00000037386	Rims2	regulating synaptic membrane exocytosis 2 [Source:MGI Symbol;Acc:MGI:2152972]	25.887	4.694133655	4.28E-09	3.97E-08	yes	up	0.13	0.05	0.11	0.12	1.49	0.2	0.096666667	0.603333333
MSTRG.8292		-	274.146	8.098802321	4.48E-09	4.14E-08	yes	up	0.08	0	0	1.34	3.18	0.4	0.026666667	1.64
MSTRG.3441		-	11.592	3.535011677	4.61E-09	4.25E-08	yes	up	0.19	0.55	0.63	1.06	1.02	1.68	0.456666667	1.253333333
ENSMUSG00000037408	Cnnm4	cyclin M4 [Source:MGI Symbol;Acc:MGI:2151060]	0.085	-3.550117544	4.90E-09	4.51E-08	yes	down	1.45	1.21	0.73	0.04	0.01	0.01	1.13	0.02
ENSMUSG00000041729	Coro2b	coronin, actin binding protein, 2B [Source:MGI Symbol;Acc:MGI:2444283]	46.033	5.524599768	5.15E-09	4.71E-08	yes	up	13.97	5.16	13.73	17.15	125.67	63.45	10.95333333	68.75666667
MSTRG.25465		-	245.825	7.941484998	5.91E-09	5.38E-08	yes	up	0.04	0	0	0.24	0.5	0.73	0.013333333	0.49
ENSMUSG00000022014	Epsti1	epithelial stromal interaction 1 (breast) [Source:MGI Symbol;Acc:MGI:1915168]	13.805	3.787133564	7.20E-09	6.46E-08	yes	up	0.43	0.54	0.18	1.08	2.45	0.23	0.383333333	1.253333333
ENSMUSG00000050377	Il31ra	interleukin 31 receptor A [Source:MGI Symbol;Acc:MGI:2180511]	10.895	3.445580273	7.40E-09	6.64E-08	yes	up	59.11	50.33	87.61	203.1	334.16	61.91	65.68333333	199.7233333
MSTRG.12521		-	220.159	7.78240436	8.35E-09	7.42E-08	yes	up	0	0	0.01	0.06	0.21	0.12	0.003333333	0.13
ENSMUSG00000051652	Lrrc3	leucine rich repeat containing 3 [Source:MGI Symbol;Acc:MGI:2447899]	0.081	-3.620154949	8.41E-09	7.47E-08	yes	down	1.43	1.22	0.71	0.01	0.04	0.01	1.12	0.02
ENSMUSG00000071537	Klrg2	killer cell lectin-like receptor subfamily G, member 2 [Source:MGI Symbol;Acc:MGI:1921503]	10.184	3.348175668	9.55E-09	8.41E-08	yes	up	0.12	0.31	0.05	0.28	0.35	0.16	0.16	0.263333333
ENSMUSG00000027386	Fbln7	fibulin 7 [Source:MGI Symbol;Acc:MGI:1917620]	0.028	-5.168398026	9.72E-09	8.56E-08	yes	down	1.99	2.32	1.31	0.01	0	0.02	1.873333333	0.01
ENSMUSG00000060044	Tmem26	transmembrane protein 26 [Source:MGI Symbol;Acc:MGI:2143537]	0.051	-4.286579466	1.03E-08	9.04E-08	yes	down	1.73	0.81	0.76	0.02	0.01	0	1.1	0.01
MSTRG.13712		-	0.005	-7.769191825	1.09E-08	9.55E-08	yes	down	18.75	12.66	2.03	0	0	0	11.14666667	0
ENSMUSG00000059027	9630013D21Rik	RIKEN cDNA 9630013D21 gene [Source:MGI Symbol;Acc:MGI:2442649]	0.041	-4.613870667	1.31E-08	1.13E-07	yes	down	3.74	3.16	6.91	0.04	0.16	0.15	4.603333333	0.116666667
ENSMUSG00000055333	Fat2	FAT atypical cadherin 2 [Source:MGI Symbol;Acc:MGI:2685369]	0.007	-7.204651302	1.31E-08	1.14E-07	yes	down	20.54	35.46	23.01	0	0	0	26.33666667	0
ENSMUSG00000050097	Ces2b	carboxyesterase 2B [Source:MGI Symbol;Acc:MGI:2448547]	0.014	-6.124715598	1.35E-08	1.17E-07	yes	down	2.76	3.34	1.6	0.02	0	0	2.566666667	0.006666667
ENSMUSG00000070031	Sp140	Sp140 nuclear body protein [Source:MGI Symbol;Acc:MGI:3702467]	12.498	3.643679617	1.38E-08	1.19E-07	yes	up	0.86	0.55	0.26	0.86	0.77	0.25	0.556666667	0.626666667
MSTRG.2701		-	56.983	5.832448518	1.40E-08	1.21E-07	yes	up	0	0.02	0.03	0.25	0.24	0.12	0.016666667	0.203333333
ENSMUSG00000102418	Sh2d1b1	SH2 domain containing 1B1 [Source:MGI Symbol;Acc:MGI:1349420]	38.846	5.279693857	1.41E-08	1.21E-07	yes	up	0	0.03	0.06	0.25	0.54	0.1	0.03	0.296666667
ENSMUSG00000020573	Pik3cg	phosphoinositide-3-kinase, catalytic, gamma polypeptide [Source:MGI Symbol;Acc:MGI:1353576]	10.892	3.445134808	1.51E-08	1.30E-07	yes	up	0.08	0.1	0.02	0.16	0.26	0.06	0.066666667	0.16
MSTRG.23392		-	20.744	4.37460038	1.61E-08	1.38E-07	yes	up	0.16	0.36	0.04	0.76	0.39	1.13	0.186666667	0.76
ENSMUSG00000041449	Serpina3h	serine (or cysteine) peptidase inhibitor, clade A, member 3H [Source:MGI Symbol;Acc:MGI:2182839]	13.389	3.742986854	1.65E-08	1.41E-07	yes	up	0.37	0.57	0.17	1.45	1.85	0.23	0.37	1.176666667
ENSMUSG00000096056	Gm21986	predicted gene 21986 [Source:MGI Symbol;Acc:MGI:5439455]	24.503	4.614902975	1.69E-08	1.44E-07	yes	up	0.01	0.07	0.02	0.09	0.09	0.3	0.033333333	0.16
ENSMUSG00000022878	Adipoq	adiponectin, C1Q and collagen domain containing [Source:MGI Symbol;Acc:MGI:106675]	201.1	7.651771086	1.77E-08	1.51E-07	yes	up	0	0.06	0	0.2	1.13	1.7	0.02	1.01
ENSMUSG00000092822	Gm23162	predicted gene, 23162 [Source:MGI Symbol;Acc:MGI:5452939]	0.007	-7.101906655	1.80E-08	1.53E-07	yes	down	15.07	9.42	7.27	0	0	0	10.58666667	0
ENSMUSG00000052270	Fpr2	formyl peptide receptor 2 [Source:MGI Symbol;Acc:MGI:1278319]	79.605	6.314787736	1.84E-08	1.56E-07	yes	up	0.18	0	0	1.35	1.34	0.25	0.06	0.98
ENSMUSG00000100426	Gm4208	predicted gene 4208 [Source:MGI Symbol;Acc:MGI:3782384]	0.006	-7.487668669	1.85E-08	1.57E-07	yes	down	8.3	2.52	5.14	0	0	0	5.32	0
ENSMUSG00000060188	Cxcl17	chemokine (C-X-C motif) ligand 17 [Source:MGI Symbol;Acc:MGI:2387642]	258.573	8.014429502	2.25E-08	1.89E-07	yes	up	0	0	0	0.43	0.59	1.08	0	0.7
MSTRG.29749		-	31.025	4.95537129	2.35E-08	1.97E-07	yes	up	0.1	0.08	0.21	0.69	1.1	0.78	0.13	0.856666667
ENSMUSG00000025475	Adgra1	adhesion G protein-coupled receptor A1 [Source:MGI Symbol;Acc:MGI:1277167]	99.996	6.643791876	2.50E-08	2.08E-07	yes	up	0.02	0	0	0.14	0.15	0.06	0.006666667	0.116666667
ENSMUSG00000095794	Igkv6-17	immunoglobulin kappa variable 6-17 [Source:MGI Symbol;Acc:MGI:1330833]	0.002	-9.019800184	2.78E-08	2.30E-07	yes	down	30.36	31.86	3.43	0	0	0	21.88333333	0
ENSMUSG00000035557	Krt17	keratin 17 [Source:MGI Symbol;Acc:MGI:96691]	92.194	6.526598118	2.99E-08	2.47E-07	yes	up	0.06	0	0	0.37	0.45	0.27	0.02	0.363333333
ENSMUSG00000024391	Apom	apolipoprotein M [Source:MGI Symbol;Acc:MGI:1930124]	0.007	-7.132972021	3.11E-08	2.56E-07	yes	down	7.17	3.24	3.82	0	0	0	4.743333333	0
ENSMUSG00000070858	Gm1673	predicted gene 1673 [Source:MGI Symbol;Acc:MGI:2686519]	16.867	4.076090124	3.13E-08	2.58E-07	yes	up	0.22	0.53	0.49	2.12	2.26	1.43	0.413333333	1.936666667
ENSMUSG00000025877	Hk3	hexokinase 3 [Source:MGI Symbol;Acc:MGI:2670962]	17.872	4.15965862	3.33E-08	2.73E-07	yes	up	0.08	0.07	0.01	0.19	0.39	0.08	0.053333333	0.22
ENSMUSG00000034463	Scara3	scavenger receptor class A, member 3 [Source:MGI Symbol;Acc:MGI:2444418]	28.648	4.840356149	3.62E-08	2.95E-07	yes	up	0.01	0.03	0.02	0.24	0.09	0.09	0.02	0.14
ENSMUSG00000031549	Ido2	indoleamine 2,3-dioxygenase 2 [Source:MGI Symbol;Acc:MGI:2142489]	0.008	-6.990766062	3.81E-08	3.10E-07	yes	down	1.48	0.87	0.82	0	0	0	1.056666667	0
ENSMUSG00000032691	Nlrp3	NLR family, pyrin domain containing 3 [Source:MGI Symbol;Acc:MGI:2653833]	36.369	5.184652182	4.19E-08	3.38E-07	yes	up	0.01	0.08	0.02	0.08	0.13	0.17	0.036666667	0.126666667
ENSMUSG00000061578	Ksr2	kinase suppressor of ras 2 [Source:MGI Symbol;Acc:MGI:3610315]	0.079	-3.670635824	4.35E-08	3.50E-07	yes	down	0.61	0.31	0.21	0.01	0	0.01	0.376666667	0.006666667
ENSMUSG00000055541	Lair1	leukocyte-associated Ig-like receptor 1 [Source:MGI Symbol;Acc:MGI:105492]	17.714	4.146817306	4.62E-08	3.70E-07	yes	up	0.16	0.09	0	0.22	1.01	0.22	0.083333333	0.483333333
ENSMUSG00000040258	Nxph4	neurexophilin 4 [Source:MGI Symbol;Acc:MGI:1336197]	0.031	-5.02048052	4.98E-08	3.97E-07	yes	down	4.4	2.83	2.34	0.02	0	0.04	3.19	0.02
ENSMUSG00000107838	Gm45769	predicted gene 45769 [Source:MGI Symbol;Acc:MGI:5804884]	0.008	-6.938266085	5.08E-08	4.05E-07	yes	down	3	1.83	1.28	0	0	0	2.036666667	0
ENSMUSG00000024922	Ovol1	ovo like zinc finger 1 [Source:MGI Symbol;Acc:MGI:1330290]	0.084	-3.571849008	5.59E-08	4.43E-07	yes	down	1.74	1.98	1.1	0.03	0.01	0.04	1.606666667	0.026666667
MSTRG.6541		-	89.157	6.4782686	5.74E-08	4.53E-07	yes	up	0.07	0	0	0.5	0.4	0.22	0.023333333	0.373333333
ENSMUSG00000113079	CR974585.1	-	201.394	7.653875396	5.78E-08	4.56E-07	yes	up	0	0.03	0	0.42	1.22	0.15	0.01	0.596666667
ENSMUSG00000095379	Gm22108	predicted gene, 22108 [Source:MGI Symbol;Acc:MGI:5451885]	20.08	4.327707894	6.03E-08	4.75E-07	yes	up	0.14	0.05	0.05	0.22	0.64	0.21	0.08	0.356666667
MSTRG.22779		-	50.16	5.64846875	6.19E-08	4.87E-07	yes	up	0.08	0.11	0	0.15	1.06	0.97	0.063333333	0.726666667
MSTRG.32257		-	202.078	7.65877046	6.78E-08	5.31E-07	yes	up	0.07	0	0	1.21	1.26	0.13	0.023333333	0.866666667
ENSMUSG00000029650	Slc46a3	solute carrier family 46, member 3 [Source:MGI Symbol;Acc:MGI:1918956]	0.018	-5.833655608	7.39E-08	5.78E-07	yes	down	6.03	7.29	4.45	0.01	0.06	0	5.923333333	0.023333333
MSTRG.7927		-	80.91	6.338248875	8.43E-08	6.54E-07	yes	up	0	0.3	0.27	5.43	5.68	0.16	0.19	3.756666667
ENSMUSG00000098320	Vis1	viral integration site 1 [Source:MGI Symbol;Acc:MGI:96091]	45.577	5.510229033	8.60E-08	6.67E-07	yes	up	0	0.05	0	0.24	0.2	0.08	0.016666667	0.173333333
ENSMUSG00000052407	Ccdc171	coiled-coil domain containing 171 [Source:MGI Symbol;Acc:MGI:1922152]	12.786	3.676468907	8.70E-08	6.74E-07	yes	up	1.23	5.02	0.34	0.74	0.34	0.14	2.196666667	0.406666667
ENSMUSG00000052605	Isoc2b	isochorismatase domain containing 2b [Source:MGI Symbol;Acc:MGI:1914691]	0.074	-3.765239632	9.40E-08	7.25E-07	yes	down	8.78	5.92	6.81	0.22	0.09	0	7.17	0.103333333
ENSMUSG00000102095	C730036E19Rik	RIKEN cDNA C730036E19 gene [Source:MGI Symbol;Acc:MGI:3028040]	0.069	-3.854993108	9.50E-08	7.32E-07	yes	down	15.92	5.39	4.61	0.35	0	0.14	8.64	0.163333333
ENSMUSG00000041481	Serpina3g	serine (or cysteine) peptidase inhibitor, clade A, member 3G [Source:MGI Symbol;Acc:MGI:105046]	10.02	3.324808864	9.52E-08	7.33E-07	yes	up	0.43	0.75	0.12	1.24	1.82	0.3	0.433333333	1.12
MSTRG.1503		-	59.804	5.902180137	9.80E-08	7.54E-07	yes	up	0.27	0	0	1.79	1.33	0.43	0.09	1.183333333
ENSMUSG00000022876	Samsn1	SAM domain, SH3 domain and nuclear localization signals, 1 [Source:MGI Symbol;Acc:MGI:1914992]	17.566	4.134727516	9.86E-08	7.58E-07	yes	up	0.04	0.08	0.06	0.39	0.24	0.13	0.06	0.253333333
ENSMUSG00000075204	Olfr1039	olfactory receptor 1039 [Source:MGI Symbol;Acc:MGI:3030873]	153.876	7.265620276	1.13E-07	8.61E-07	yes	up	0	0	0.01	0.13	0.18	0.04	0.003333333	0.116666667
MSTRG.12904		-	13.55	3.760206974	1.14E-07	8.66E-07	yes	up	0.22	0.34	0.74	1.54	1.56	1.36	0.433333333	1.486666667
ENSMUSG00000040751	Lat2	linker for activation of T cells family, member 2 [Source:MGI Symbol;Acc:MGI:1926479]	13.924	3.79953249	1.17E-07	8.88E-07	yes	up	0.35	0.17	0.08	0.61	1.15	0.31	0.2	0.69
ENSMUSG00000050635	Sprr2f	small proline-rich protein 2F [Source:MGI Symbol;Acc:MGI:1330349]	180.871	7.498817928	1.18E-07	8.96E-07	yes	up	0	0	0	0.8	0.96	0.55	0	0.77
ENSMUSG00000099146	0610031O16Rik	RIKEN cDNA 0610031O16 gene [Source:MGI Symbol;Acc:MGI:1915619]	0.019	-5.717689383	1.25E-07	9.44E-07	yes	down	10.92	8.83	6.59	0	0.06	0.03	8.78	0.03
ENSMUSG00000022780	Meltf	melanotransferrin [Source:MGI Symbol;Acc:MGI:1353421]	148.564	7.214939671	1.34E-07	1.01E-06	yes	up	0	0.01	0	0.06	0.12	0.13	0.003333333	0.103333333
ENSMUSG00000023349	Clec4n	C-type lectin domain family 4, member n [Source:MGI Symbol;Acc:MGI:1861231]	14.889	3.896191607	1.39E-07	1.04E-06	yes	up	0.11	0.18	0.18	0.77	0.79	0.16	0.156666667	0.573333333
ENSMUSG00000007122	Casq1	calsequestrin 1 [Source:MGI Symbol;Acc:MGI:1309468]	29.483	4.881833124	1.42E-07	1.07E-06	yes	up	0.05	0.04	0.19	0.45	0.65	0.19	0.093333333	0.43
ENSMUSG00000075014	Gm10800	predicted gene 10800 [Source:MGI Symbol;Acc:MGI:3641657]	20.949	4.388838502	1.49E-07	1.12E-06	yes	up	0.68	1.39	0.71	3.2	8.4	1.84	0.926666667	4.48
ENSMUSG00000052821	Cysltr1	cysteinyl leukotriene receptor 1 [Source:MGI Symbol;Acc:MGI:1926218]	12.937	3.693392051	1.52E-07	1.13E-06	yes	up	0.04	0.03	0.02	0.17	0.24	0.04	0.03	0.15
ENSMUSG00000055612	Cdca7	cell division cycle associated 7 [Source:MGI Symbol;Acc:MGI:1914203]	11.678	3.545744363	1.54E-07	1.15E-06	yes	up	0.15	0.16	0.03	0.51	0.52	0.1	0.113333333	0.376666667
ENSMUSG00000002769	Gnmt	glycine N-methyltransferase [Source:MGI Symbol;Acc:MGI:1202304]	0.033	-4.920025125	1.56E-07	1.16E-06	yes	down	5.85	8.24	2.98	0	0.04	0.08	5.69	0.04
ENSMUSG00000034164	Emid1	EMI domain containing 1 [Source:MGI Symbol;Acc:MGI:2155091]	0.087	-3.529602068	1.63E-07	1.21E-06	yes	down	3.61	3.66	2.27	0.05	0.08	0.02	3.18	0.05
ENSMUSG00000059213	Ddn	dendrin [Source:MGI Symbol;Acc:MGI:108101]	0.078	-3.682198887	1.66E-07	1.23E-06	yes	down	1.1	1.08	0.81	0.03	0.01	0.02	0.996666667	0.02
ENSMUSG00000048424	Ranbp3l	RAN binding protein 3-like [Source:MGI Symbol;Acc:MGI:2444654]	0.09	-3.470827267	1.75E-07	1.29E-06	yes	down	1.71	1.34	0.87	0.02	0.02	0.03	1.306666667	0.023333333
MSTRG.25462		-	10.625	3.409347189	1.89E-07	1.39E-06	yes	up	1.07	0.32	0.64	2.01	0.58	2.09	0.676666667	1.56
ENSMUSG00000113175	AC117226.2	-	0.01	-6.681244588	1.93E-07	1.42E-06	yes	down	7.05	5.08	6.24	0	0	0	6.123333333	0
ENSMUSG00000093829	Gm24798	predicted gene, 24798 [Source:MGI Symbol;Acc:MGI:5454575]	201.262	7.652929217	1.96E-07	1.44E-06	yes	up	0	0	0	0.16	0.27	0.05	0	0.16
MSTRG.23074		-	18.31	4.194537192	2.07E-07	1.51E-06	yes	up	0.01	0.49	0.01	0.14	0.05	0.15	0.17	0.113333333
MSTRG.9218		-	230.065	7.845900383	2.14E-07	1.56E-06	yes	up	7.91	0.85	1.59	2.64	289.65	217.68	3.45	169.99
ENSMUSG00000039981	Zc3h12d	zinc finger CCCH type containing 12D [Source:MGI Symbol;Acc:MGI:3045313]	10.918	3.448605298	2.21E-07	1.61E-06	yes	up	0.07	0.03	0.03	0.12	0.12	0.08	0.043333333	0.106666667
ENSMUSG00000055978	Fut2	fucosyltransferase 2 [Source:MGI Symbol;Acc:MGI:109374]	11.83	3.564406487	2.22E-07	1.62E-06	yes	up	0.08	0.11	0.04	0.32	0.11	0.15	0.076666667	0.193333333
ENSMUSG00000070343	Gm10288	predicted gene 10288 [Source:MGI Symbol;Acc:MGI:3704227]	0.005	-7.591976857	2.26E-07	1.65E-06	yes	down	2.63	22.28	23.4	0	0	0	16.10333333	0
MSTRG.13792		-	0.006	-7.430660747	2.28E-07	1.66E-06	yes	down	2.91	27.53	10.76	0	0	0	13.73333333	0
ENSMUSG00000020787	P2rx1	purinergic receptor P2X, ligand-gated ion channel, 1 [Source:MGI Symbol;Acc:MGI:1098235]	0.01	-6.592807762	2.45E-07	1.78E-06	yes	down	1.47	1.76	1.1	0	0	0	1.443333333	0
MSTRG.20160		-	0.009	-6.77329971	2.46E-07	1.78E-06	yes	down	7.6	3.47	4.84	0	0	0	5.303333333	0
ENSMUSG00000037477	Tbx10	T-box 10 [Source:MGI Symbol;Acc:MGI:1261436]	0.01	-6.681210526	2.47E-07	1.79E-06	yes	down	2.66	1.57	1.73	0	0	0	1.986666667	0
MSTRG.9204		-	117.79	6.88007491	2.51E-07	1.81E-06	yes	up	10.78	1.92	2.54	5.05	212.06	159.8	5.08	125.6366667
ENSMUSG00000102349	Gm37376	predicted gene, 37376 [Source:MGI Symbol;Acc:MGI:5610604]	0.008	-6.951629164	2.51E-07	1.81E-06	yes	down	8.46	20.12	18.55	0	0	0	15.71	0
ENSMUSG00000089812	Gm15867	predicted gene 15867 [Source:MGI Symbol;Acc:MGI:3801862]	187.849	7.553431388	2.59E-07	1.87E-06	yes	up	0	0	0	3.21	3	0.78	0	2.33
ENSMUSG00000108435	Gm45051	predicted gene 45051 [Source:MGI Symbol;Acc:MGI:5753627]	0.071	-3.811203208	2.77E-07	1.99E-06	yes	down	6.24	7.35	3.87	0.05	0	0.22	5.82	0.09
ENSMUSG00000023110	Prmt5	protein arginine N-methyltransferase 5 [Source:MGI Symbol;Acc:MGI:1351645]	88.797	6.472437701	2.82E-07	2.03E-06	yes	up	8.55	3.63	2.03	3.76	246.46	176.42	4.736666667	142.2133333
ENSMUSG00000052131	Akr1b7	aldo-keto reductase family 1, member B7 [Source:MGI Symbol;Acc:MGI:101918]	0.067	-3.908439083	2.95E-07	2.12E-06	yes	down	4.66	3.81	1.99	0.06	0.03	0.06	3.486666667	0.05
ENSMUSG00000021416	Eci3	enoyl-Coenzyme A delta isomerase 3 [Source:MGI Symbol;Acc:MGI:1916373]	0.015	-6.063398212	3.05E-07	2.18E-06	yes	down	114.74	109.03	56.85	0.56	0	0.32	93.54	0.293333333
ENSMUSG00000024679	Ms4a6d	membrane-spanning 4-domains, subfamily A, member 6D [Source:MGI Symbol;Acc:MGI:1916024]	20.876	4.383776092	3.27E-07	2.33E-06	yes	up	0.34	0	0.22	0.47	1.18	0.38	0.186666667	0.676666667
ENSMUSG00000024340	Btnl2	butyrophilin-like 2 [Source:MGI Symbol;Acc:MGI:1859549]	122.182	6.932890957	3.29E-07	2.34E-06	yes	up	0.02	0	0	0.14	0.14	0.15	0.006666667	0.143333333
MSTRG.22264		-	12.314	3.622256998	3.58E-07	2.54E-06	yes	up	0.06	0.19	0.12	0.35	0.74	0.08	0.123333333	0.39
ENSMUSG00000059406	Tmprss9	transmembrane protease, serine 9 [Source:MGI Symbol;Acc:MGI:3612246]	0.021	-5.593379494	3.69E-07	2.61E-06	yes	down	1.41	1.37	1.17	0	0.02	0	1.316666667	0.006666667
ENSMUSG00000029204	Rhoh	ras homolog family member H [Source:MGI Symbol;Acc:MGI:1921984]	16.787	4.069285675	3.82E-07	2.70E-06	yes	up	0.04	0.1	0	0.22	0.26	0.14	0.046666667	0.206666667
ENSMUSG00000027559	Car3	carbonic anhydrase 3 [Source:MGI Symbol;Acc:MGI:88270]	18.194	4.185393807	3.89E-07	2.74E-06	yes	up	4.58	1.36	2.12	4.23	8.59	17.17	2.686666667	9.996666667
MSTRG.32254		-	0.011	-6.511702815	4.08E-07	2.87E-06	yes	down	5.54	4.15	2.44	0	0	0	4.043333333	0
ENSMUSG00000054958	Nt5c1a	5'-nucleotidase, cytosolic IA [Source:MGI Symbol;Acc:MGI:2155700]	174.528	7.447315982	4.29E-07	3.01E-06	yes	up	0	0	0	0.35	0.37	0.1	0	0.273333333
ENSMUSG00000067149	Jchain	immunoglobulin joining chain [Source:MGI Symbol;Acc:MGI:96493]	0.033	-4.926593281	4.43E-07	3.10E-06	yes	down	43.57	48.43	5.85	0.27	0.4	0.03	32.61666667	0.233333333
MSTRG.26428		-	174.553	7.447520179	4.45E-07	3.11E-06	yes	up	0.01	0	0	0.35	0.43	0.09	0.003333333	0.29
MSTRG.1873		-	12.512	3.645266944	4.49E-07	3.14E-06	yes	up	48.21	61.11	83.17	194.29	98.69	274.91	64.16333333	189.2966667
ENSMUSG00000042672	Dcst1	DC-STAMP domain containing 1 [Source:MGI Symbol;Acc:MGI:1925022]	0.021	-5.606838544	4.57E-07	3.20E-06	yes	down	3.75	2.72	3.21	0.09	0	0	3.226666667	0.03
ENSMUSG00000095788	Sirpb1a	signal-regulatory protein beta 1A [Source:MGI Symbol;Acc:MGI:2444824]	17.642	4.14092426	4.81E-07	3.36E-06	yes	up	0.06	0.07	0.06	0.24	0.3	0.22	0.063333333	0.253333333
ENSMUSG00000092381	Gm20512	predicted gene 20512 [Source:MGI Symbol;Acc:MGI:5141977]	61.795	5.949423861	5.14E-07	3.57E-06	yes	up	0.41	0.22	1.55	11.18	8.12	13.78	0.726666667	11.02666667
MSTRG.27839		-	0.011	-6.46796516	5.41E-07	3.75E-06	yes	down	1.59	1.64	1.41	0	0	0	1.546666667	0
ENSMUSG00000086243	Gm12121	predicted gene 12121 [Source:MGI Symbol;Acc:MGI:3651988]	0.098	-3.354232721	5.64E-07	3.91E-06	yes	down	1.76	3.87	1.73	0.04	0.02	0.02	2.453333333	0.026666667
ENSMUSG00000050100	Hmx2	H6 homeobox 2 [Source:MGI Symbol;Acc:MGI:107159]	0.095	-3.393847236	5.83E-07	4.02E-06	yes	down	3.14	6.87	2.41	0.11	0	0.12	4.14	0.076666667
ENSMUSG00000017607	Tns4	tensin 4 [Source:MGI Symbol;Acc:MGI:2144377]	47.073	5.55682293	6.29E-07	4.31E-06	yes	up	0.01	0.01	0	0.36	0.14	0.15	0.006666667	0.216666667
MSTRG.12774		-	204.788	7.677990062	6.55E-07	4.48E-06	yes	up	0	0	0	0.49	0.21	0.05	0	0.25
ENSMUSG00000095351	Igkv3-2	immunoglobulin kappa variable 3-2 [Source:MGI Symbol;Acc:MGI:1330850]	0.003	-8.591060514	6.73E-07	4.59E-06	yes	down	25.61	21.17	1.98	0	0	0	16.25333333	0
ENSMUSG00000045775	Slc16a5	solute carrier family 16 (monocarboxylic acid transporters), member 5 [Source:MGI Symbol;Acc:MGI:2443515]	0.1	-3.323290253	6.78E-07	4.62E-06	yes	down	2.11	2.16	1.72	0.08	0	0.05	1.996666667	0.043333333
ENSMUSG00000073016	Uprt	uracil phosphoribosyltransferase [Source:MGI Symbol;Acc:MGI:2685620]	35.149	5.135420946	6.80E-07	4.63E-06	yes	up	0	0.03	0.03	0.09	0.3	0.15	0.02	0.18
ENSMUSG00000105265	Sox2ot	SOX2 overlapping transcript (non-protein coding) [Source:MGI Symbol;Acc:MGI:2444112]	0.011	-6.449116077	7.12E-07	4.84E-06	yes	down	2	1.43	1.22	0	0	0	1.55	0
ENSMUSG00000024526	Cidea	cell death-inducing DNA fragmentation factor, alpha subunit-like effector A [Source:MGI Symbol;Acc:MGI:1270845]	166.788	7.381873974	7.22E-07	4.90E-06	yes	up	0	0	0	0.3	0.14	0.31	0	0.25
ENSMUSG00000037922	Bank1	B cell scaffold protein with ankyrin repeats 1 [Source:MGI Symbol;Acc:MGI:2442120]	21.681	4.438350771	7.38E-07	5.00E-06	yes	up	0.04	0.04	0	0.28	0.13	0.07	0.026666667	0.16
ENSMUSG00000025726	Slc28a1	solute carrier family 28 (sodium-coupled nucleoside transporter), member 1 [Source:MGI Symbol;Acc:MGI:3605073]	0.012	-6.393756637	7.44E-07	5.04E-06	yes	down	1.4	1.27	1.04	0	0	0	1.236666667	0
ENSMUSG00000058492	Scp2-ps2	sterol carrier protein 2, pseudogene 2 [Source:MGI Symbol;Acc:MGI:107679]	0.071	-3.819525257	7.53E-07	5.09E-06	yes	down	4.06	3.4	1.63	0.05	0.04	0.06	3.03	0.05
ENSMUSG00000043633	Fam221b	family with sequence similarity 221, member B [Source:MGI Symbol;Acc:MGI:2441678]	0.021	-5.559498804	7.82E-07	5.27E-06	yes	down	1.4	1.9	0.53	0	0	0.01	1.276666667	0.003333333
ENSMUSG00000051669	AU021092	expressed sequence AU021092 [Source:MGI Symbol;Acc:MGI:2146559]	0.023	-5.411889554	8.18E-07	5.49E-06	yes	down	4.67	4.34	1.99	0.03	0	0.03	3.666666667	0.02
ENSMUSG00000056553	Ptprn2	protein tyrosine phosphatase, receptor type, N polypeptide 2 [Source:MGI Symbol;Acc:MGI:107418]	20.12	4.330584816	8.48E-07	5.67E-06	yes	up	0.18	0	0.07	0.52	0.82	0.44	0.083333333	0.593333333
ENSMUSG00000048442	Smim5	small integral membrane protein 5 [Source:MGI Symbol;Acc:MGI:1913778]	0.023	-5.416403476	8.65E-07	5.77E-06	yes	down	6.5	7.76	4.12	0.11	0	0	6.126666667	0.036666667
ENSMUSG00000030093	Wnt7a	wingless-type MMTV integration site family, member 7A [Source:MGI Symbol;Acc:MGI:98961]	55.347	5.790421927	8.70E-07	5.81E-06	yes	up	0.04	0	0	0.07	0.12	0.2	0.013333333	0.13
ENSMUSG00000021256	Vash1	vasohibin 1 [Source:MGI Symbol;Acc:MGI:2442543]	25.234	4.657274533	9.08E-07	6.04E-06	yes	up	0.03	0.03	0.07	0.17	0.65	0.05	0.043333333	0.29
ENSMUSG00000079298	Klrb1b	killer cell lectin-like receptor subfamily B member 1B [Source:MGI Symbol;Acc:MGI:107539]	10.261	3.359099192	9.21E-07	6.12E-06	yes	up	0.21	0.1	0.1	0.32	0.45	0.08	0.136666667	0.283333333
ENSMUSG00000030137	Tuba8	tubulin, alpha 8 [Source:MGI Symbol;Acc:MGI:1858225]	11.183	3.483210804	9.28E-07	6.16E-06	yes	up	0.13	0.05	0.05	0.21	0.23	0.13	0.076666667	0.19
ENSMUSG00000032523	Hhatl	hedgehog acyltransferase-like [Source:MGI Symbol;Acc:MGI:1922020]	0.053	-4.225234902	9.38E-07	6.23E-06	yes	down	1.67	3.3	1.76	0.02	0.02	0.04	2.243333333	0.026666667
ENSMUSG00000040026	Saa3	serum amyloid A 3 [Source:MGI Symbol;Acc:MGI:98223]	130.628	7.029324411	9.42E-07	6.25E-06	yes	up	0	0	0.11	2.22	1.49	0.33	0.036666667	1.346666667
ENSMUSG00000054855	Rnd1	Rho family GTPase 1 [Source:MGI Symbol;Acc:MGI:2444878]	10.816	3.435091316	9.96E-07	6.59E-06	yes	up	0.14	0.15	0.06	0.32	0.23	0.23	0.116666667	0.26
ENSMUSG00000094613	A630076J17Rik	RIKEN cDNA A630076J17 gene [Source:MGI Symbol;Acc:MGI:2442999]	0.015	-6.090736492	1.03E-06	6.78E-06	yes	down	8.97	8.96	6.21	0.07	0	0	8.046666667	0.023333333
MSTRG.6229		-	33.223	5.054105461	1.03E-06	6.79E-06	yes	up	0	0.02	0.03	0.07	0.15	0.15	0.016666667	0.123333333
ENSMUSG00000038704	Aspdh	aspartate dehydrogenase domain containing [Source:MGI Symbol;Acc:MGI:1915602]	0.016	-5.968166292	1.03E-06	6.80E-06	yes	down	91.72	89.26	71.51	1.05	0	0.18	84.16333333	0.41
ENSMUSG00000079293	Clec7a	C-type lectin domain family 7, member a [Source:MGI Symbol;Acc:MGI:1861431]	10.193	3.349445658	1.06E-06	6.97E-06	yes	up	0.39	0.4	0.03	0.54	1.19	0.23	0.273333333	0.653333333
ENSMUSG00000024575	Pde6a	phosphodiesterase 6A, cGMP-specific, rod, alpha [Source:MGI Symbol;Acc:MGI:97524]	0.012	-6.389031793	1.08E-06	7.10E-06	yes	down	0.97	0.8	0.85	0	0	0	0.873333333	0
ENSMUSG00000037868	Egr2	early growth response 2 [Source:MGI Symbol;Acc:MGI:95296]	27.22	4.766619485	1.14E-06	7.48E-06	yes	up	0.07	0.04	0	0.37	0.28	0.06	0.036666667	0.236666667
MSTRG.27190		-	0.077	-3.69015643	1.16E-06	7.56E-06	yes	down	0.76	0.78	1.39	0.01	0.01	0.03	0.976666667	0.016666667
MSTRG.12661		-	0.012	-6.375047073	1.31E-06	8.49E-06	yes	down	2.18	2.37	2.48	0	0	0	2.343333333	0
ENSMUSG00000066363	Serpina3f	serine (or cysteine) peptidase inhibitor, clade A, member 3F [Source:MGI Symbol;Acc:MGI:2182838]	47.344	5.565105848	1.36E-06	8.81E-06	yes	up	0	0.05	0	0.13	0.22	0.23	0.016666667	0.193333333
ENSMUSG00000024041	Cryaa	crystallin, alpha A [Source:MGI Symbol;Acc:MGI:88515]	0.012	-6.436357583	1.48E-06	9.53E-06	yes	down	1.04	3.21	1.75	0	0	0	2	0
ENSMUSG00000026166	Ccl20	chemokine (C-C motif) ligand 20 [Source:MGI Symbol;Acc:MGI:1329031]	61.932	5.952603786	1.54E-06	9.91E-06	yes	up	0	0.06	0.06	0.91	0.33	0.43	0.04	0.556666667
ENSMUSG00000015947	Fcgr1	Fc receptor, IgG, high affinity I [Source:MGI Symbol;Acc:MGI:95498]	10.802	3.433202711	1.57E-06	1.01E-05	yes	up	0.21	0.29	0.01	0.22	0.33	0.55	0.17	0.366666667
ENSMUSG00000052688	Rab7b	RAB7B, member RAS oncogene family [Source:MGI Symbol;Acc:MGI:2442295]	11.334	3.502552087	1.63E-06	1.04E-05	yes	up	0.22	0.07	0.03	0.21	0.7	0.16	0.106666667	0.356666667
ENSMUSG00000074529	Zfp972	zinc finger protein 972 [Source:MGI Symbol;Acc:MGI:1925953]	11.656	3.542952493	1.77E-06	1.13E-05	yes	up	0.04	0.22	0.07	0.42	0.15	0.08	0.11	0.216666667
MSTRG.3669		-	0.012	-6.418536616	1.89E-06	1.20E-05	yes	down	4.57	1.69	1.68	0	0	0	2.646666667	0
ENSMUSG00000089694	Nat8f7	N-acetyltransferase 8 (GCN5-related) family member 7 [Source:MGI Symbol;Acc:MGI:3782661]	0.016	-6.006634048	1.90E-06	1.21E-05	yes	down	5.83	3.51	1.17	0	0	0.07	3.503333333	0.023333333
ENSMUSG00000060985	Tdrd5	tudor domain containing 5 [Source:MGI Symbol;Acc:MGI:2684949]	0.016	-5.989121643	2.04E-06	1.29E-05	yes	down	1.52	0.96	0.79	0.01	0	0	1.09	0.003333333
ENSMUSG00000052516	Robo2	roundabout guidance receptor 2 [Source:MGI Symbol;Acc:MGI:1890110]	0.089	-3.492138282	2.14E-06	1.35E-05	yes	down	0.7	2.01	0.61	0	0.02	0.01	1.106666667	0.01
MSTRG.11420		-	0.013	-6.286312442	2.16E-06	1.36E-05	yes	down	1.84	0.91	0.97	0	0	0	1.24	0
ENSMUSG00000046840	Hnf4aos	hepatic nuclear factor 4 alpha, opposite strand [Source:MGI Symbol;Acc:MGI:1915564]	0.016	-5.929780964	2.24E-06	1.41E-05	yes	down	7.71	7.42	4.69	0	0	0.1	6.606666667	0.033333333
ENSMUSG00000072664	Ugt3a1	UDP glycosyltransferases 3 family, polypeptide A1 [Source:MGI Symbol;Acc:MGI:2146055]	0.014	-6.167508234	2.29E-06	1.44E-05	yes	down	306.01	266.14	193.81	2.23	0	0.94	255.32	1.056666667
ENSMUSG00000037263	Aldh3b3	aldehyde dehydrogenase 3 family, member B3 [Source:MGI Symbol;Acc:MGI:1920708]	0.014	-6.194445003	2.41E-06	1.51E-05	yes	down	1.75	1.81	1.47	0	0	0	1.676666667	0
ENSMUSG00000031934	Panx1	pannexin 1 [Source:MGI Symbol;Acc:MGI:1860055]	10.004	3.322538411	2.49E-06	1.56E-05	yes	up	0.09	0.1	0.06	0.26	0.21	0.03	0.083333333	0.166666667
ENSMUSG00000105135	Gm43667	predicted gene 43667 [Source:MGI Symbol;Acc:MGI:5663804]	0.098	-3.346077031	2.60E-06	1.62E-05	yes	down	6.97	5.05	2.63	0.04	0.04	0.23	4.883333333	0.103333333
MSTRG.29145		-	0.01	-6.618709523	2.64E-06	1.64E-05	yes	down	2.09	0.4	0.82	0	0	0	1.103333333	0
ENSMUSG00000014301	Pam16	presequence translocase-asssociated motor 16 homolog (S. cerevisiae) [Source:MGI Symbol;Acc:MGI:1913699]	0.038	-4.713108636	2.64E-06	1.64E-05	yes	down	15.44	7.17	12.08	0.15	0	0.27	11.56333333	0.14
MSTRG.31457		-	12.435	3.636390284	2.72E-06	1.69E-05	yes	up	0.14	0.39	0.03	0.23	0.65	0.54	0.186666667	0.473333333
ENSMUSG00000005553	Atp4a	ATPase, H+/K+ exchanging, gastric, alpha polypeptide [Source:MGI Symbol;Acc:MGI:88113]	0.087	-3.520101987	2.77E-06	1.72E-05	yes	down	2.72	3.36	1.33	0.11	0	0.02	2.47	0.043333333
ENSMUSG00000028246	Faxc	failed axon connections homolog [Source:MGI Symbol;Acc:MGI:1923382]	101.18	6.660784755	2.86E-06	1.77E-05	yes	up	0	0	0.02	0.06	0.11	0.03	0.006666667	0.066666667
ENSMUSG00000111083	AC153954.2	-	136.378	7.091467279	2.87E-06	1.77E-05	yes	up	0	0	0	0.56	1.36	1.05	0	0.99
ENSMUSG00000002100	Mybpc3	myosin binding protein C, cardiac [Source:MGI Symbol;Acc:MGI:102844]	0.012	-6.401029555	2.89E-06	1.79E-05	yes	down	0.3	0.62	0.61	0	0	0	0.51	0
ENSMUSG00000054204	Fam150b	family with sequence similarity 150, member B [Source:MGI Symbol;Acc:MGI:3697448]	0.014	-6.18931243	3.07E-06	1.88E-05	yes	down	4.24	3.12	1.33	0	0	0	2.896666667	0
MSTRG.10993		-	0.014	-6.185706877	3.15E-06	1.93E-05	yes	down	1.56	0.84	0.63	0	0	0	1.01	0
ENSMUSG00000022061	Nkx3-1	NK-3 transcription factor, locus 1 (Drosophila) [Source:MGI Symbol;Acc:MGI:97352]	0.015	-6.077560119	3.34E-06	2.04E-05	yes	down	0.7	0.67	0.4	0	0	0	0.59	0
MSTRG.25341		-	19.686	4.299091039	3.53E-06	2.15E-05	yes	up	0.01	0	0.04	0.07	0.13	0.08	0.016666667	0.093333333
ENSMUSG00000053613	Notumos	notum pectinacetylesterase homolog (Drosophila), opposite strand [Source:MGI Symbol;Acc:MGI:3698431]	0.015	-6.07180129	3.54E-06	2.15E-05	yes	down	0.79	0.76	0.57	0	0	0	0.706666667	0
ENSMUSG00000113358	CT025627.1	-	0.013	-6.225282098	3.65E-06	2.22E-05	yes	down	3.78	1.54	1.8	0	0	0	2.373333333	0
ENSMUSG00000101585	1600010M07Rik	RIKEN cDNA 1600010M07 gene [Source:MGI Symbol;Acc:MGI:1917031]	134.295	7.069264489	3.74E-06	2.26E-05	yes	up	0	0	0	0.52	0.94	0.67	0	0.71
ENSMUSG00000002992	Apoc2	apolipoprotein C-II [Source:MGI Symbol;Acc:MGI:88054]	62.032	5.954946106	4.00E-06	2.41E-05	yes	up	0.24	0	0	1.55	0.54	0.74	0.08	0.943333333
MSTRG.9965		-	0.099	-3.342574944	4.05E-06	2.44E-05	yes	down	3.06	1.82	1.7	0.08	0	0.06	2.193333333	0.046666667
ENSMUSG00000068037	Mas1	MAS1 oncogene [Source:MGI Symbol;Acc:MGI:96918]	0.015	-6.058280338	4.22E-06	2.54E-05	yes	down	1.21	1.56	0.85	0	0	0	1.206666667	0
ENSMUSG00000104887	Gm43158	predicted gene 43158 [Source:MGI Symbol;Acc:MGI:5663295]	0.03	-5.042156184	4.72E-06	2.81E-05	yes	down	4.63	5.9	3.19	0.03	0	1.75	4.573333333	0.593333333
ENSMUSG00000019987	Arg1	arginase, liver [Source:MGI Symbol;Acc:MGI:88070]	24.661	4.624149471	5.26E-06	3.12E-05	yes	up	0.06	0.08	0	0.42	0.24	0.1	0.046666667	0.253333333
ENSMUSG00000058740	Kcnt1	potassium channel, subfamily T, member 1 [Source:MGI Symbol;Acc:MGI:1924627]	0.015	-6.020646695	5.37E-06	3.18E-05	yes	down	0.65	0.84	0.76	0	0	0	0.75	0
ENSMUSG00000090175	Ugt1a9	UDP glucuronosyltransferase 1 family, polypeptide A9 [Source:MGI Symbol;Acc:MGI:3576092]	0.003	-8.370010703	5.46E-06	3.23E-05	yes	down	5.98	8.27	0.47	0	0	0	4.906666667	0
ENSMUSG00000070695	Cntnap5a	contactin associated protein-like 5A [Source:MGI Symbol;Acc:MGI:3643623]	0.015	-6.015744964	5.49E-06	3.24E-05	yes	down	2.6	1.3	1.41	0	0	0	1.77	0
ENSMUSG00000020159	Gabrp	gamma-aminobutyric acid (GABA) A receptor, pi [Source:MGI Symbol;Acc:MGI:2387597]	129.637	7.018330568	5.50E-06	3.25E-05	yes	up	0	0	0	0.04	0.11	0.04	0	0.063333333
ENSMUSG00000110040	AC034099.1	-	142.366	7.153463907	5.54E-06	3.27E-05	yes	up	0	0	0	0.22	0.21	0.57	0	0.333333333
ENSMUSG00000030546	Plin1	perilipin 1 [Source:MGI Symbol;Acc:MGI:1890505]	48.816	5.609292992	5.58E-06	3.29E-05	yes	up	0	0.05	0	0.08	0.23	0.18	0.016666667	0.163333333
ENSMUSG00000085998	AW822252	expressed sequence AW822252 [Source:MGI Symbol;Acc:MGI:2148030]	0.018	-5.758417281	5.63E-06	3.32E-05	yes	down	6.08	4.09	3.48	0	0	0.04	4.55	0.013333333
MSTRG.2568		-	0.015	-6.095282758	5.87E-06	3.46E-05	yes	down	2.92	1.55	0.97	0	0	0	1.813333333	0
ENSMUSG00000059325	Hopx	HOP homeobox [Source:MGI Symbol;Acc:MGI:1916782]	0.097	-3.362575708	5.97E-06	3.51E-05	yes	down	4.49	3.93	1.68	0.06	0.11	0.04	3.366666667	0.07
ENSMUSG00000027797	Dclk1	doublecortin-like kinase 1 [Source:MGI Symbol;Acc:MGI:1330861]	33.756	5.07708445	6.38E-06	3.73E-05	yes	up	0.01	0.01	0.01	0.08	0.03	0.06	0.01	0.056666667
ENSMUSG00000003411	Rab3b	RAB3B, member RAS oncogene family [Source:MGI Symbol;Acc:MGI:1917158]	0.083	-3.598118393	6.40E-06	3.74E-05	yes	down	3.11	2.47	2.51	0.04	0.12	0.04	2.696666667	0.066666667
ENSMUSG00000062794	Zfp599	zinc finger protein 599 [Source:MGI Symbol;Acc:MGI:2679006]	21.716	4.440702123	6.44E-06	3.76E-05	yes	up	0.01	0.01	0.03	0.1	0.14	0.04	0.016666667	0.093333333
MSTRG.14578		-	0.016	-6.004101063	6.51E-06	3.80E-05	yes	down	0.87	1.34	0.8	0	0	0	1.003333333	0
ENSMUSG00000008193	Spib	Spi-B transcription factor (Spi-1/PU.1 related) [Source:MGI Symbol;Acc:MGI:892986]	19.754	4.30406155	6.53E-06	3.81E-05	yes	up	0.03	0.05	0	0.09	0.22	0.07	0.026666667	0.126666667
ENSMUSG00000097503	3110045C21Rik	RIKEN cDNA 3110045C21 gene [Source:MGI Symbol;Acc:MGI:1914553]	0.016	-5.970235178	6.65E-06	3.87E-05	yes	down	2.5	1.58	1.45	0	0	0	1.843333333	0
MSTRG.15175		-	0.088	-3.503040292	6.65E-06	3.87E-05	yes	down	2.61	1.86	2.2	0.15	0.08	0	2.223333333	0.076666667
ENSMUSG00000099669	Gm29012	predicted gene 29012 [Source:MGI Symbol;Acc:MGI:5579718]	0.008	-7.020092954	6.75E-06	3.93E-05	yes	down	14.33	0.73	7.59	0	0	0	7.55	0
MSTRG.23243		-	0.013	-6.230634006	6.97E-06	4.04E-05	yes	down	5.55	7.83	10.51	0	0	0	7.963333333	0
ENSMUSG00000039853	Trim14	tripartite motif-containing 14 [Source:MGI Symbol;Acc:MGI:1921985]	15.923	3.993004288	7.08E-06	4.10E-05	yes	up	0.33	0.06	0.01	0.46	0.93	0.22	0.133333333	0.536666667
MSTRG.13944		-	25.04	4.646168203	7.42E-06	4.28E-05	yes	up	0.02	0.05	0.02	0.24	0.23	0.03	0.03	0.166666667
ENSMUSG00000028362	Tnfsf8	tumor necrosis factor (ligand) superfamily, member 8 [Source:MGI Symbol;Acc:MGI:88328]	82.414	6.364815125	7.48E-06	4.30E-05	yes	up	0.01	0	0	0.14	0.06	0.12	0.003333333	0.106666667
ENSMUSG00000035818	Plekhs1	pleckstrin homology domain containing, family S member 1 [Source:MGI Symbol;Acc:MGI:2443041]	32.258	5.011585165	7.48E-06	4.30E-05	yes	up	0.02	0	0.03	0.16	0.12	0.09	0.016666667	0.123333333
ENSMUSG00000030187	Klra2	killer cell lectin-like receptor, subfamily A, member 2 [Source:MGI Symbol;Acc:MGI:101906]	15.701	3.972785322	7.61E-06	4.38E-05	yes	up	0.12	0.15	0	0.21	0.46	0.18	0.09	0.283333333
ENSMUSG00000072674	Plac9b	placenta specific 9b [Source:MGI Symbol;Acc:MGI:3711222]	0.016	-5.93979553	7.77E-06	4.46E-05	yes	down	2.14	2.59	1.55	0	0	0	2.093333333	0
ENSMUSG00000031283	Chrdl1	chordin-like 1 [Source:MGI Symbol;Acc:MGI:1933172]	0.061	-4.041281205	7.82E-06	4.48E-05	yes	down	1.4	0.77	0.43	0.03	0	0.01	0.866666667	0.013333333
ENSMUSG00000105954	Gm42793	predicted gene 42793 [Source:MGI Symbol;Acc:MGI:5662930]	100.656	6.653296152	8.12E-06	4.65E-05	yes	up	0.04	0	0	0.52	0.1	0.22	0.013333333	0.28
ENSMUSG00000049988	Lrrc25	leucine rich repeat containing 25 [Source:MGI Symbol;Acc:MGI:2445284]	22.751	4.507842343	8.30E-06	4.74E-05	yes	up	0.22	0.08	0	0.67	0.72	0.06	0.1	0.483333333
ENSMUSG00000089943	Ugt1a5	UDP glucuronosyltransferase 1 family, polypeptide A5 [Source:MGI Symbol;Acc:MGI:3032634]	0.068	-3.888275235	8.32E-06	4.75E-05	yes	down	4.14	2.41	0.95	0	0.11	0	2.5	0.036666667
MSTRG.9990		-	144.885	7.178760363	8.47E-06	4.83E-05	yes	up	0	0	0	0.16	0.24	0.63	0	0.343333333
ENSMUSG00000028435	Aqp3	aquaporin 3 [Source:MGI Symbol;Acc:MGI:1333777]	0.025	-5.297873967	8.61E-06	4.91E-05	yes	down	24.59	23.42	11.55	0.06	0	0.23	19.85333333	0.096666667
ENSMUSG00000039145	Camk1d	calcium/calmodulin-dependent protein kinase ID [Source:MGI Symbol;Acc:MGI:2442190]	10.778	3.430024053	8.88E-06	5.06E-05	yes	up	10.28	17.47	23.84	92.6	37.07	12.89	17.19666667	47.52
MSTRG.25901		-	295.452	8.206778443	9.03E-06	5.14E-05	yes	up	0.29	0	0	5.17	3.97	7.38	0.096666667	5.506666667
ENSMUSG00000039710	Slc7a12	solute carrier family 7 (cationic amino acid transporter, y+ system), member 12 [Source:MGI Symbol;Acc:MGI:2156159]	15.682	3.971063878	9.10E-06	5.18E-05	yes	up	0.22	0.04	0.15	0.46	0.17	0.41	0.136666667	0.346666667
ENSMUSG00000111645	CT030644.1	-	83.918	6.390901473	9.71E-06	5.49E-05	yes	up	0.33	0	0	1.49	2.56	0.88	0.11	1.643333333
ENSMUSG00000031662	Snx20	sorting nexin 20 [Source:MGI Symbol;Acc:MGI:1918857]	10.058	3.330281317	1.02E-05	5.77E-05	yes	up	0.15	0.22	0.09	0.31	0.72	0.09	0.153333333	0.373333333
MSTRG.11613		-	93.64	6.549046832	1.02E-05	5.77E-05	yes	up	0.3	0	0.07	2.11	3.4	2	0.123333333	2.503333333
ENSMUSG00000003228	Grk5	G protein-coupled receptor kinase 5 [Source:MGI Symbol;Acc:MGI:109161]	19.56	4.28979863	1.04E-05	5.88E-05	yes	up	1.11	1.13	0.85	0.39	7.02	5.51	1.03	4.306666667
ENSMUSG00000014813	Stc1	stanniocalcin 1 [Source:MGI Symbol;Acc:MGI:109131]	0.075	-3.743437199	1.09E-05	6.16E-05	yes	down	0.78	0.94	0.44	0.01	0.01	0.02	0.72	0.013333333
ENSMUSG00000074639	Rdh16f2	RDH16 family member 2 [Source:MGI Symbol;Acc:MGI:3583955]	0.032	-4.977426731	1.14E-05	6.40E-05	yes	down	54.76	41.07	19.65	0.48	0	0.28	38.49333333	0.253333333
MSTRG.8144		-	11.877	3.570051561	1.18E-05	6.61E-05	yes	up	0.59	0.24	0	0.44	0.69	0.78	0.276666667	0.636666667
ENSMUSG00000029371	Cxcl5	chemokine (C-X-C motif) ligand 5 [Source:MGI Symbol;Acc:MGI:1096868]	124.417	6.9590407	1.18E-05	6.62E-05	yes	up	0	0	0	0.11	0.07	0.19	0	0.123333333
MSTRG.3666		-	0.016	-5.979441305	1.23E-05	6.86E-05	yes	down	1.25	2.33	0.68	0	0	0	1.42	0
ENSMUSG00000063063	Ctnna2	catenin (cadherin associated protein), alpha 2 [Source:MGI Symbol;Acc:MGI:88275]	0.016	-5.958892509	1.24E-05	6.89E-05	yes	down	1.45	0.91	1.48	0	0	0	1.28	0
MSTRG.18723		-	118.629	6.890307272	1.28E-05	7.13E-05	yes	up	0	0	0	0.5	0.48	0.13	0	0.37
MSTRG.6193		-	91.451	6.514921371	1.29E-05	7.15E-05	yes	up	0	0.01	0	0.02	0.07	0.08	0.003333333	0.056666667
ENSMUSG00000069793	Slfn9	schlafen 9 [Source:MGI Symbol;Acc:MGI:2445121]	10.409	3.379783067	1.36E-05	7.52E-05	yes	up	0.05	0.06	0.04	0.07	0.33	0.04	0.05	0.146666667
ENSMUSG00000076928	Trac	T cell receptor alpha constant [Source:MGI Symbol;Acc:MGI:4439838]	0.018	-5.815701262	1.40E-05	7.72E-05	yes	down	7.76	3.03	5.7	0	0.05	0	5.496666667	0.016666667
ENSMUSG00000009394	Syn2	synapsin II [Source:MGI Symbol;Acc:MGI:103020]	0.055	-4.197255399	1.44E-05	7.92E-05	yes	down	0.97	1.39	0.54	0	0.01	0.02	0.966666667	0.01
ENSMUSG00000027994	Mcub	mitochondrial calcium uniporter dominant negative beta subunit [Source:MGI Symbol;Acc:MGI:1914065]	17.965	4.167138625	1.45E-05	7.95E-05	yes	up	0.03	0.14	0.04	0.4	0.18	0.46	0.07	0.346666667
ENSMUSG00000030549	Rhcg	Rhesus blood group-associated C glycoprotein [Source:MGI Symbol;Acc:MGI:1888517]	0.05	-4.334733331	1.47E-05	8.08E-05	yes	down	24.46	37.13	26.31	0.41	0.04	1.31	29.3	0.586666667
MSTRG.31786		-	50.746	5.665208313	1.51E-05	8.27E-05	yes	up	0	0	0.08	0.23	0.62	0.24	0.026666667	0.363333333
ENSMUSG00000111133	AC160123.2	-	14.152	3.822909288	1.56E-05	8.55E-05	yes	up	0.18	0	0.36	0.47	0.97	0.54	0.18	0.66
ENSMUSG00000021070	Bdkrb2	bradykinin receptor, beta 2 [Source:MGI Symbol;Acc:MGI:102845]	17.487	4.128205744	1.61E-05	8.80E-05	yes	up	0.03	0.02	0.04	0.11	0.03	0.18	0.03	0.106666667
ENSMUSG00000032649	Colgalt2	collagen beta(1-O)galactosyltransferase 2 [Source:MGI Symbol;Acc:MGI:2138232]	0.096	-3.38266873	1.65E-05	8.98E-05	yes	down	0.78	0.76	0.38	0.02	0.01	0.02	0.64	0.016666667
MSTRG.10046		-	0.018	-5.768067615	1.66E-05	9.04E-05	yes	down	1.03	1.24	0.78	0	0	0	1.016666667	0
ENSMUSG00000054385	Ceacam2	carcinoembryonic antigen-related cell adhesion molecule 2 [Source:MGI Symbol;Acc:MGI:1347246]	0.047	-4.408093107	1.70E-05	9.25E-05	yes	down	1.55	1.23	0.38	0	0.03	0	1.053333333	0.01
ENSMUSG00000018865	Sult4a1	sulfotransferase family 4A, member 1 [Source:MGI Symbol;Acc:MGI:1888971]	18.852	4.236634216	1.75E-05	9.49E-05	yes	up	0.07	0	0.03	0.18	0.09	0.13	0.033333333	0.133333333
MSTRG.13326		-	51.689	5.691776582	1.78E-05	9.63E-05	yes	up	0.07	0.1	2.16	0.03	2.26	1.15	0.776666667	1.146666667
ENSMUSG00000071005	Ccl19	chemokine (C-C motif) ligand 19 [Source:MGI Symbol;Acc:MGI:1346316]	0.023	-5.471799832	1.78E-05	9.67E-05	yes	down	5.54	5.29	3.05	0	0.09	0	4.626666667	0.03
ENSMUSG00000021749	Oit1	oncoprotein induced transcript 1 [Source:MGI Symbol;Acc:MGI:1201784]	11.656	3.543024604	1.80E-05	9.72E-05	yes	up	0.07	0.1	0.13	0.24	0.29	0.28	0.1	0.27
ENSMUSG00000022240	Ctnnd2	catenin (cadherin associated protein), delta 2 [Source:MGI Symbol;Acc:MGI:1195966]	60.323	5.914644436	1.83E-05	9.89E-05	yes	up	0.01	0.01	0	0.06	0.01	14.65	0.006666667	4.906666667
ENSMUSG00000012705	Retn	resistin [Source:MGI Symbol;Acc:MGI:1888506]	76.251	6.25268293	1.88E-05	0.00010165	yes	up	0.06	0.05	0	0.15	0.21	1.23	0.036666667	0.53
ENSMUSG00000104445	Rhbg	Rhesus blood group-associated B glycoprotein [Source:MGI Symbol;Acc:MGI:1927379]	0.014	-6.184386851	1.90E-05	0.000102502	yes	down	11.58	17.69	6.89	0	0	0.09	12.05333333	0.03
MSTRG.13555		-	0.023	-5.455551432	1.98E-05	0.000106242	yes	down	15.89	15.41	8.07	0	0.2	0	13.12333333	0.066666667
ENSMUSG00000108511	Gm44987	predicted gene 44987 [Source:MGI Symbol;Acc:MGI:5753563]	0.019	-5.738742297	2.11E-05	0.000112578	yes	down	3.62	3.5	1.56	0	0	0	2.893333333	0
ENSMUSG00000078995	Zfp456	zinc finger protein 456 [Source:MGI Symbol;Acc:MGI:3040694]	81.191	6.3432549	2.13E-05	0.000113712	yes	up	0	0	0	0.03	0.09	0.06	0	0.06
MSTRG.936		-	0.037	-4.740272851	2.33E-05	0.0001231	yes	down	1.28	1.01	0.76	0	0.01	0.01	1.016666667	0.006666667
ENSMUSG00000040726	Hesx1	homeobox gene expressed in ES cells [Source:MGI Symbol;Acc:MGI:96071]	74.042	6.21027372	2.39E-05	0.000126347	yes	up	0.04	0	0	0.21	0.18	0.28	0.013333333	0.223333333
ENSMUSG00000004933	Matk	megakaryocyte-associated tyrosine kinase [Source:MGI Symbol;Acc:MGI:99259]	10.049	3.329051596	2.40E-05	0.000127048	yes	up	0.04	0.17	0.05	0.33	0.26	0.16	0.086666667	0.25
ENSMUSG00000098915	Rpl15-ps2	ribosomal protein L15, pseudogene 2 [Source:MGI Symbol;Acc:MGI:3648255]	146.864	7.198332167	2.41E-05	0.000127258	yes	up	0.12	0	0	2.12	0	1.28	0.04	1.133333333
ENSMUSG00000037254	Itih2	inter-alpha trypsin inhibitor, heavy chain 2 [Source:MGI Symbol;Acc:MGI:96619]	0.024	-5.397222473	2.44E-05	0.000128927	yes	down	1.12	0.82	0.56	0.01	0	0	0.833333333	0.003333333
MSTRG.19337		-	136.186	7.089431626	2.46E-05	0.000129694	yes	up	0	0	0	0.41	1.26	0.09	0	0.586666667
ENSMUSG00000034266	Batf	basic leucine zipper transcription factor, ATF-like [Source:MGI Symbol;Acc:MGI:1859147]	87.714	6.45473171	2.46E-05	0.00012986	yes	up	0.05	0.05	0	0.17	1.88	0.05	0.033333333	0.7
ENSMUSG00000034040	Wbscr17	Williams-Beuren syndrome chromosome region 17 homolog (human) [Source:MGI Symbol;Acc:MGI:2137594]	143.183	7.161713312	2.47E-05	0.000130025	yes	up	0	0	0	0.72	2.26	0	0	0.993333333
MSTRG.25146		-	0.012	-6.336108245	2.52E-05	0.000132739	yes	down	0.66	0.27	1.37	0	0	0	0.766666667	0
ENSMUSG00000108714	Gm21057	predicted gene, 21057 [Source:MGI Symbol;Acc:MGI:5434414]	0.019	-5.737848824	2.56E-05	0.000134638	yes	down	2.54	4.61	2.96	0	0	0	3.37	0
MSTRG.2700		-	38.853	5.279958099	2.75E-05	0.000144078	yes	up	1.41	0.94	0	6.75	0.28	5.29	0.783333333	4.106666667
ENSMUSG00000046203	Sprr2g	small proline-rich protein 2G [Source:MGI Symbol;Acc:MGI:1330348]	100.578	6.65216761	2.78E-05	0.000145405	yes	up	0	0	0	0.4	0.51	0.25	0	0.386666667
MSTRG.8970		-	11.708	3.549453671	3.11E-05	0.000162098	yes	up	0.21	0.16	0.11	0.4	0.08	0.62	0.16	0.366666667
ENSMUSG00000104510	Gm34015	predicted gene, 34015 [Source:MGI Symbol;Acc:MGI:5593174]	13.526	3.757697553	3.12E-05	0.000162458	yes	up	0.27	0.25	0.08	0.84	0.58	0.35	0.2	0.59
ENSMUSG00000042734	Ttc9	tetratricopeptide repeat domain 9 [Source:MGI Symbol;Acc:MGI:1916730]	15.548	3.958622635	3.22E-05	0.000167269	yes	up	0.18	0.03	0	0.18	0.24	0.03	0.07	0.15
ENSMUSG00000067786	Nnat	neuronatin [Source:MGI Symbol;Acc:MGI:104716]	42.963	5.425036127	3.24E-05	0.000168225	yes	up	0.05	0.05	0	0.34	0.24	0.13	0.033333333	0.236666667
ENSMUSG00000035246	Pcyt1b	phosphate cytidylyltransferase 1, choline, beta isoform [Source:MGI Symbol;Acc:MGI:2147987]	23.9	4.578927863	3.36E-05	0.000174056	yes	up	0.02	0	0.01	0.04	0.09	0.03	0.01	0.053333333
ENSMUSG00000074575	Kcng1	potassium voltage-gated channel, subfamily G, member 1 [Source:MGI Symbol;Acc:MGI:3616086]	0.02	-5.622306658	3.64E-05	0.000187345	yes	down	0.45	0.3	0.23	0	0	0	0.326666667	0
MSTRG.32268		-	15.655	3.96851904	4.06E-05	0.000207108	yes	up	0.21	0.13	0	0.13	0.63	0.33	0.113333333	0.363333333
ENSMUSG00000046070	Igfals	insulin-like growth factor binding protein, acid labile subunit [Source:MGI Symbol;Acc:MGI:107973]	0.097	-3.360519272	4.22E-05	0.00021424	yes	down	1.34	2.57	0.7	0.05	0.05	0	1.536666667	0.033333333
ENSMUSG00000053465	Hs6st3	heparan sulfate 6-O-sulfotransferase 3 [Source:MGI Symbol;Acc:MGI:1354960]	107.304	6.745555754	4.29E-05	0.000217464	yes	up	0	0.05	0	0.28	0.05	0.86	0.016666667	0.396666667
ENSMUSG00000056130	Ticam2	toll-like receptor adaptor molecule 2 [Source:MGI Symbol;Acc:MGI:3040056]	45.788	5.516887487	4.52E-05	0.000228765	yes	up	0.02	0.02	0	0.13	0.19	0.02	0.013333333	0.113333333
ENSMUSG00000073433	Arhgdig	Rho GDP dissociation inhibitor (GDI) gamma [Source:MGI Symbol;Acc:MGI:108430]	12.284	3.618656751	4.55E-05	0.0002303	yes	up	0.14	0.13	0.17	0.16	0.44	0.61	0.146666667	0.403333333
ENSMUSG00000036353	P2ry12	purinergic receptor P2Y, G-protein coupled 12 [Source:MGI Symbol;Acc:MGI:1918089]	10.011	3.323521378	4.77E-05	0.00024057	yes	up	0.09	0.09	0.03	0.11	0.53	0.25	0.07	0.296666667
ENSMUSG00000027513	Pck1	phosphoenolpyruvate carboxykinase 1, cytosolic [Source:MGI Symbol;Acc:MGI:97501]	0.081	-3.629744143	5.09E-05	0.000255962	yes	down	285.27	281.35	159.51	4.2	0.76	6.75	242.0433333	3.903333333
ENSMUSG00000108980	Gm45155	predicted gene 45155 [Source:MGI Symbol;Acc:MGI:5753731]	19.605	4.293132564	5.28E-05	0.000264183	yes	up	0	0.91	0	1.43	1.21	1.09	0.303333333	1.243333333
ENSMUSG00000108815	SETD1A	SET domain containing 1A [Source:HGNC Symbol;Acc:HGNC:29010]	10.854	3.440216763	5.44E-05	0.000271781	yes	up	0.6	0	0.38	0.84	0.59	0.6	0.326666667	0.676666667
ENSMUSG00000056054	S100a8	S100 calcium binding protein A8 (calgranulin A) [Source:MGI Symbol;Acc:MGI:88244]	10.108	3.33742555	5.71E-05	0.000284852	yes	up	0.83	1.61	0	2.09	2.13	1.16	0.813333333	1.793333333
MSTRG.24090		-	13.743	3.780618644	5.82E-05	0.000289584	yes	up	0.37	0	0.71	1.29	1.19	1.32	0.36	1.266666667
ENSMUSG00000037738	Nek5	NIMA (never in mitosis gene a)-related expressed kinase 5 [Source:MGI Symbol;Acc:MGI:2142824]	20.981	4.390984502	5.94E-05	0.00029495	yes	up	0	0.02	0.05	0.14	0.13	0.09	0.023333333	0.12
ENSMUSG00000021613	Hapln1	hyaluronan and proteoglycan link protein 1 [Source:MGI Symbol;Acc:MGI:1337006]	0.021	-5.602628023	5.96E-05	0.00029575	yes	down	0.63	1.79	1.27	0	0	0	1.23	0
ENSMUSG00000043592	Unc5cl	unc-5 family C-terminal like [Source:MGI Symbol;Acc:MGI:1923839]	12.567	3.651559366	6.24E-05	0.000309157	yes	up	0.1	0.1	0.02	0.05	0.34	0.19	0.073333333	0.193333333
ENSMUSG00000024972	Lgals12	lectin, galactose binding, soluble 12 [Source:MGI Symbol;Acc:MGI:1929094]	10.201	3.3506343	6.36E-05	0.000314361	yes	up	0.05	0.06	0.03	0.09	0.12	0.09	0.046666667	0.1
ENSMUSG00000112289	AC153937.3	-	0.019	-5.700396297	6.41E-05	0.000316731	yes	down	3.01	8.96	2.32	0	0	0	4.763333333	0
MSTRG.8545		-	109.4	6.773469229	6.52E-05	0.000322114	yes	up	0	0	0	1.4	0.76	0.15	0	0.77
ENSMUSG00000113657	AC112259.1	-	74.352	6.21630885	6.87E-05	0.000338106	yes	up	4.81	0	0	42.92	7.99	19.87	1.603333333	23.59333333
ENSMUSG00000086686	F630206G17Rik	RIKEN cDNA F630206G17 gene [Source:MGI Symbol;Acc:MGI:3665471]	0.021	-5.557527119	6.88E-05	0.000338194	yes	down	0.89	0.42	0.44	0	0	0	0.583333333	0
MSTRG.7070		-	0.023	-5.454886578	7.04E-05	0.000345655	yes	down	14.39	11.7	7.94	0	0	0	11.34333333	0
ENSMUSG00000074934	Grem1	gremlin 1, DAN family BMP antagonist [Source:MGI Symbol;Acc:MGI:1344337]	26.562	4.731288271	7.50E-05	0.000366352	yes	up	0.05	0	0.01	0.05	0.03	0.19	0.02	0.09
ENSMUSG00000047507	Baiap3	BAI1-associated protein 3 [Source:MGI Symbol;Acc:MGI:2685783]	0.023	-5.442399809	7.65E-05	0.000372636	yes	down	0.73	0.8	0.59	0	0	0	0.706666667	0
MSTRG.6204		-	21.006	4.392737024	8.00E-05	0.000388434	yes	up	0	0.15	0.35	0.18	2.02	0.84	0.166666667	1.013333333
ENSMUSG00000040706	Agmat	agmatine ureohydrolase (agmatinase) [Source:MGI Symbol;Acc:MGI:1923236]	0.038	-4.722887152	8.22E-05	0.000398413	yes	down	3.71	1.19	1.69	0	0	0.05	2.196666667	0.016666667
ENSMUSG00000028217	Cdh17	cadherin 17 [Source:MGI Symbol;Acc:MGI:1095414]	87.064	6.444000456	8.26E-05	0.000399979	yes	up	0	0	0	0.04	0.05	0.03	0	0.04
ENSMUSG00000029445	Hpd	4-hydroxyphenylpyruvic acid dioxygenase [Source:MGI Symbol;Acc:MGI:96213]	0.009	-6.798156886	8.30E-05	0.000401977	yes	down	61.15	48.21	23.85	0	0	0.19	44.40333333	0.063333333
ENSMUSG00000035109	Shc4	SHC (Src homology 2 domain containing) family, member 4 [Source:MGI Symbol;Acc:MGI:2655364]	120.662	6.914830434	8.41E-05	0.000406796	yes	up	0	0	0	0.01	0.12	0.02	0	0.05
MSTRG.2620		-	13.942	3.801385782	8.72E-05	0.000420634	yes	up	0.72	0.17	0.65	1.06	4.11	0.54	0.513333333	1.903333333
ENSMUSG00000067206	Lrrc66	leucine rich repeat containing 66 [Source:MGI Symbol;Acc:MGI:2387634]	0.027	-5.192202751	8.72E-05	0.000420634	yes	down	0.71	0.93	0.3	0	0	0.01	0.646666667	0.003333333
ENSMUSG00000061144	Spink12	serine peptidase inhibitor, Kazal type 12 [Source:MGI Symbol;Acc:MGI:1925492]	11.976	3.582106574	8.72E-05	0.000420634	yes	up	0.15	0.39	0	0.61	0.31	0.44	0.18	0.453333333
ENSMUSG00000075334	Rprm	reprimo, TP53 dependent G2 arrest mediator candidate [Source:MGI Symbol;Acc:MGI:1915124]	17.402	4.121208391	8.90E-05	0.000428549	yes	up	0.09	0.11	0.05	0.05	0.19	0.62	0.083333333	0.286666667
ENSMUSG00000045027	Prss22	protease, serine 22 [Source:MGI Symbol;Acc:MGI:1918085]	34.985	5.128675659	8.91E-05	0.000429176	yes	up	0.07	0.03	0	0.57	0.09	0.09	0.033333333	0.25
ENSMUSG00000020264	Slc36a2	solute carrier family 36 (proton/amino acid symporter), member 2 [Source:MGI Symbol;Acc:MGI:1891430]	27.37	4.774507352	9.03E-05	0.000433983	yes	up	0	0.03	0.01	0.06	0.09	0.13	0.013333333	0.093333333
ENSMUSG00000050108	Bpifc	BPI fold containing family C [Source:MGI Symbol;Acc:MGI:3026884]	11.689	3.547062228	9.61E-05	0.000459782	yes	up	0.06	0.05	0.01	0.18	0.1	0.04	0.04	0.106666667
MSTRG.10939		-	0.023	-5.429282369	9.63E-05	0.000460554	yes	down	3.25	3.19	3.07	0	0	0	3.17	0
MSTRG.31411		-	0.021	-5.608227858	9.80E-05	0.000468111	yes	down	1.53	0.47	0.53	0	0	0	0.843333333	0
MSTRG.8352		-	70.091	6.131162907	0.000100813	0.000480345	yes	up	0	0	0.15	1.12	1.37	0.14	0.05	0.876666667
MSTRG.29146		-	0.024	-5.38467247	0.000101564	0.000483548	yes	down	3.45	2.22	1.92	0	0	0	2.53	0
ENSMUSG00000063193	Cd300lb	CD300 molecule like family member B [Source:MGI Symbol;Acc:MGI:2685099]	27.399	4.776057102	0.000101821	0.000484643	yes	up	0.03	0.01	0	0.11	0.04	0.09	0.013333333	0.08
MSTRG.19036		-	0.03	-5.0650943	0.000101912	0.000484827	yes	down	1.59	1.79	1.19	0	0.03	0	1.523333333	0.01
ENSMUSG00000039385	Cdh6	cadherin 6 [Source:MGI Symbol;Acc:MGI:107435]	14.857	3.893084819	0.000102685	0.000488376	yes	up	0.08	0	0.03	0.16	0.08	0.09	0.036666667	0.11
MSTRG.20520		-	0.087	-3.52562565	0.000106908	0.000506498	yes	down	2.53	1.27	1.37	0.05	0	0.05	1.723333333	0.033333333
MSTRG.253		-	0.03	-5.076624925	0.00010812	0.000511187	yes	down	4.54	4.21	2.72	0	0	0.04	3.823333333	0.013333333
MSTRG.9988		-	0.022	-5.505516539	0.0001083	0.000511776	yes	down	2.88	1.41	2.12	0	0	0	2.136666667	0
MSTRG.11936		-	139.673	7.125912215	0.000117289	0.000550291	yes	up	0	0	0	0.85	0.69	0	0	0.513333333
ENSMUSG00000089739	Gm20431	predicted gene 20431 [Source:MGI Symbol;Acc:MGI:5141896]	0.024	-5.399751618	0.000118097	0.000552952	yes	down	0.29	0.36	0.33	0	0	0	0.326666667	0
ENSMUSG00000035964	Tmem59l	transmembrane protein 59-like [Source:MGI Symbol;Acc:MGI:1915187]	89.012	6.475921041	0.000118376	0.000553735	yes	up	0	0	0	0.15	0.14	0.21	0	0.166666667
ENSMUSG00000105263	Gm42427	predicted gene 42427 [Source:MGI Symbol;Acc:MGI:5662564]	54.56	5.769777989	0.000119291	0.000557124	yes	up	0.19	0.02	0.26	0.16	6.22	0.92	0.156666667	2.433333333
ENSMUSG00000016493	Cd46	CD46 antigen, complement regulatory protein [Source:MGI Symbol;Acc:MGI:1203290]	0.072	-3.805546833	0.000125538	0.000583454	yes	down	0.41	0.36	0.29	0	0.01	0.01	0.353333333	0.006666667
ENSMUSG00000040229	Gpr34	G protein-coupled receptor 34 [Source:MGI Symbol;Acc:MGI:1346334]	13.459	3.750524767	0.00012788	0.000593319	yes	up	0.09	0.02	0.04	0.11	0.1	0.21	0.05	0.14
MSTRG.29891		-	31720.257	14.95311683	0.000129487	0.00060002	yes	up	0	0	0	0	332.87	219.46	0	184.11
ENSMUSG00000086320	Gm12840	predicted gene 12840 [Source:MGI Symbol;Acc:MGI:3650917]	23.569	4.558824007	0.000130015	0.00060216	yes	up	0.06	0	0.18	0.47	0.58	0.53	0.08	0.526666667
ENSMUSG00000031489	Adrb3	adrenergic receptor, beta 3 [Source:MGI Symbol;Acc:MGI:87939]	95.541	6.578050066	0.000130541	0.000604296	yes	up	0	0	0	0.08	0.04	0.11	0	0.076666667
MSTRG.8293		-	21.989	4.45868085	0.000137068	0.000631331	yes	up	0.1	0.1	0.15	0.85	1.17	0.09	0.116666667	0.703333333
MSTRG.6870		-	37.432	5.226187708	0.000137297	0.000632227	yes	up	0.19	0	0	0.57	0.35	0.34	0.063333333	0.42
ENSMUSG00000010021	Kif19a	kinesin family member 19A [Source:MGI Symbol;Acc:MGI:2447024]	34.565	5.111257019	0.000139172	0.000640058	yes	up	0.04	0	0.03	0.1	0.17	0.15	0.023333333	0.14
ENSMUSG00000034209	Rasl10a	RAS-like, family 10, member A [Source:MGI Symbol;Acc:MGI:1922918]	17.685	4.144451707	0.00013946	0.000641221	yes	up	0	0.08	0.19	0.14	0.34	0.33	0.09	0.27
MSTRG.15124		-	14.809	3.888434759	0.000141124	0.000648064	yes	up	5.83	8.44	22.75	102.63	46.42	12.38	12.34	53.81
ENSMUSG00000057729	Prtn3	proteinase 3 [Source:MGI Symbol;Acc:MGI:893580]	62.062	5.95564567	0.000143891	0.000659615	yes	up	0	0.06	0	0.17	0.65	0.18	0.02	0.333333333
ENSMUSG00000027171	Prrg4	proline rich Gla (G-carboxyglutamic acid) 4 (transmembrane) [Source:MGI Symbol;Acc:MGI:2442211]	55.151	5.785311648	0.00015211	0.000694181	yes	up	0.01	0	0	0.06	0.09	0.04	0.003333333	0.063333333
ENSMUSG00000026679	Enkur	enkurin, TRPC channel interacting protein [Source:MGI Symbol;Acc:MGI:1918483]	12.002	3.585186165	0.000154338	0.000702777	yes	up	0.04	0.07	0.16	0.23	0.38	0.17	0.09	0.26
ENSMUSG00000044863	Defb36	defensin beta 36 [Source:MGI Symbol;Acc:MGI:2385956]	66.665	6.058854741	0.000159832	0.000725638	yes	up	0.18	0	0	0.91	1.99	0.16	0.06	1.02
ENSMUSG00000054986	Sec14l3	SEC14-like lipid binding 3 [Source:MGI Symbol;Acc:MGI:3617848]	0.03	-5.078055069	0.000162915	0.000738175	yes	down	1.06	0.53	0.54	0.01	0	0	0.71	0.003333333
ENSMUSG00000030249	Abcc9	ATP-binding cassette, sub-family C (CFTR/MRP), member 9 [Source:MGI Symbol;Acc:MGI:1352630]	0.032	-4.9651041	0.000165787	0.00074971	yes	down	0.22	0.3	0.15	0.01	0	0	0.223333333	0.003333333
MSTRG.13932		-	18.939	4.243312618	0.000166556	0.00075282	yes	up	0.66	0	1.18	4	3.74	3.43	0.613333333	3.723333333
ENSMUSG00000034792	Gna15	guanine nucleotide binding protein, alpha 15 [Source:MGI Symbol;Acc:MGI:95770]	11.217	3.487653141	0.000167369	0.000756123	yes	up	0.05	0.04	0.25	0.54	0.28	0.32	0.113333333	0.38
ENSMUSG00000092627	D130058E05Rik	RIKEN cDNA D130058E05 gene [Source:MGI Symbol;Acc:MGI:2444614]	89.565	6.484857611	0.000175685	0.000789424	yes	up	0	0	0	0.05	0.08	0.03	0	0.053333333
ENSMUSG00000106535	Gm43031	predicted gene 43031 [Source:MGI Symbol;Acc:MGI:5663168]	0.066	-3.920381585	0.000176677	0.000793494	yes	down	2.36	0.81	0.85	0	0.02	0.04	1.34	0.02
ENSMUSG00000107872	Gm44511	predicted gene 44511 [Source:MGI Symbol;Acc:MGI:5753087]	14.116	3.819270116	0.000177858	0.000798017	yes	up	1.39	1.22	0.59	3.49	2.2	3.07	1.066666667	2.92
ENSMUSG00000092130	D030025P21Rik	RIKEN cDNA D030025P21 gene [Source:MGI Symbol;Acc:MGI:3698049]	84.369	6.398648851	0.000178796	0.000801833	yes	up	0	0	0	0.06	0.03	0.08	0	0.056666667
MSTRG.11149		-	0.025	-5.33100551	0.000180269	0.000807653	yes	down	2.22	1.27	0.72	0	0	0	1.403333333	0
MSTRG.17802		-	0.033	-4.927463278	0.000186513	0.000832784	yes	down	4.88	5.35	5.9	0	0	0.06	5.376666667	0.02
ENSMUSG00000044951	Mylk4	myosin light chain kinase family, member 4 [Source:MGI Symbol;Acc:MGI:3643758]	15.422	3.94691589	0.00019373	0.000861527	yes	up	0.01	0.01	0.01	0.02	0.06	0.03	0.01	0.036666667
ENSMUSG00000078487	Ankrd65	ankyrin repeat domain 65 [Source:MGI Symbol;Acc:MGI:2685285]	0.029	-5.117461169	0.000196499	0.000871448	yes	down	0.92	1.55	1.58	0	0.02	0	1.35	0.006666667
MSTRG.8842		-	0.1	-3.322500504	0.000196726	0.000872034	yes	down	3.61	3.86	3.03	0.12	0	0.12	3.5	0.08
ENSMUSG00000101389	Ms4a4a	membrane-spanning 4-domains, subfamily A, member 4A [Source:MGI Symbol;Acc:MGI:3643932]	63.249	5.982981968	0.000197506	0.000875069	yes	up	0	0	0.06	0.32	0.63	0.05	0.02	0.333333333
ENSMUSG00000112435	AC122210.3	-	0.026	-5.25949373	0.000204855	0.000904578	yes	down	2.34	1.88	0.86	0	0	0	1.693333333	0
ENSMUSG00000090564	A430057M04Rik	RIKEN cDNA A430057M04 gene [Source:MGI Symbol;Acc:MGI:2442125]	36.135	5.175310003	0.000207064	0.000913676	yes	up	0.04	0	0	0.05	0.08	0.08	0.013333333	0.07
MSTRG.1500		-	0.012	-6.385087705	0.000208888	0.000920401	yes	down	4.77	0.14	0.31	0	0	0	1.74	0
ENSMUSG00000058427	Cxcl2	chemokine (C-X-C motif) ligand 2 [Source:MGI Symbol;Acc:MGI:1340094]	20.162	4.333576649	0.000209321	0.000922086	yes	up	0	0.04	0.11	0.28	0.13	0.12	0.05	0.176666667
ENSMUSG00000037490	Slc2a12	solute carrier family 2 (facilitated glucose transporter), member 12 [Source:MGI Symbol;Acc:MGI:3052471]	0.071	-3.815594024	0.000210767	0.00092801	yes	down	2.54	1.26	0.41	0	0	0.03	1.403333333	0.01
ENSMUSG00000070390	Nlrp1b	NLR family, pyrin domain containing 1B [Source:MGI Symbol;Acc:MGI:3582959]	17.238	4.107498933	0.000211595	0.000930767	yes	up	0.02	0.02	0	0.07	0.08	0.02	0.013333333	0.056666667
MSTRG.8092		-	21.681	4.438337226	0.000213491	0.000938431	yes	up	0	0.09	0.1	0.45	0.1	0.42	0.063333333	0.323333333
ENSMUSG00000003545	Fosb	FBJ osteosarcoma oncogene B [Source:MGI Symbol;Acc:MGI:95575]	57.551	5.846770288	0.000213685	0.000938837	yes	up	0	0	0.01	0.04	0.09	0.02	0.003333333	0.05
MSTRG.6205		-	175.582	7.45600371	0.00022324	0.000977311	yes	up	0	0	0.21	10.86	1.01	0.65	0.07	4.173333333
ENSMUSG00000095380	Gm23952	predicted gene, 23952 [Source:MGI Symbol;Acc:MGI:5453729]	0.027	-5.228504368	0.000225545	0.000986935	yes	down	2.46	2.08	0.95	0	0	0	1.83	0
ENSMUSG00000058883	Zfp708	zinc finger protein 708 [Source:MGI Symbol;Acc:MGI:3040674]	0.024	-5.382610684	0.000234594	0.001024472	yes	down	0.78	0.24	0.42	0	0	0	0.48	0
ENSMUSG00000032561	Acpp	acid phosphatase, prostate [Source:MGI Symbol;Acc:MGI:1928480]	0.033	-4.921304419	0.000237464	0.0010359	yes	down	0.61	0.4	0.22	0.01	0	0	0.41	0.003333333
ENSMUSG00000045871	Slitrk6	SLIT and NTRK-like family, member 6 [Source:MGI Symbol;Acc:MGI:2443198]	0.034	-4.879692033	0.000238396	0.001039457	yes	down	0.53	0.36	0.23	0	0.01	0	0.373333333	0.003333333
ENSMUSG00000043924	Ncmap	noncompact myelin associated protein [Source:MGI Symbol;Acc:MGI:2444888]	17.623	4.139389046	0.000247686	0.001075626	yes	up	0.06	0.03	0.03	0.16	0.25	0.05	0.04	0.153333333
ENSMUSG00000090145	Ugt1a6b	UDP glucuronosyltransferase 1 family, polypeptide A6B [Source:MGI Symbol;Acc:MGI:3580629]	0.084	-3.573412482	0.000248768	0.001080068	yes	down	6.36	4.71	0.26	0.09	0	0.08	3.776666667	0.056666667
MSTRG.13967		-	0.024	-5.401091596	0.000249292	0.001082091	yes	down	0.81	0.87	1.45	0	0	0	1.043333333	0
ENSMUSG00000008461	Fut1	fucosyltransferase 1 [Source:MGI Symbol;Acc:MGI:109375]	85.032	6.409936287	0.000253509	0.001098577	yes	up	0	0	0	0.03	0.13	0.03	0	0.063333333
ENSMUSG00000079014	Serpina3i	serine (or cysteine) peptidase inhibitor, clade A, member 3I [Source:MGI Symbol;Acc:MGI:2182841]	11.386	3.509241031	0.00025479	0.001103608	yes	up	0.08	0.21	0.08	0.89	0.18	0.02	0.123333333	0.363333333
MSTRG.5233		-	0.026	-5.240381864	0.000254968	0.001104033	yes	down	0.73	1.37	0.78	0	0	0	0.96	0
ENSMUSG00000056296	Synpr	synaptoporin [Source:MGI Symbol;Acc:MGI:1919253]	0.008	-6.970103882	0.000260619	0.001126207	yes	down	2.59	6.65	0.25	0.13	0	0	3.163333333	0.043333333
MSTRG.10935		-	82.825	6.371998857	0.000264608	0.001142102	yes	up	0	0	0	2.14	1.77	0.54	0	1.483333333
ENSMUSG00000025064	Col17a1	collagen, type XVII, alpha 1 [Source:MGI Symbol;Acc:MGI:88450]	21.717	4.440737353	0.00026795	0.00115544	yes	up	0	0.01	0.01	0.2	0.04	0.02	0.006666667	0.086666667
ENSMUSG00000038128	Camk4	calcium/calmodulin-dependent protein kinase IV [Source:MGI Symbol;Acc:MGI:88258]	0.028	-5.153091985	0.000271287	0.00116764	yes	down	8.87	6.06	4.52	0	0	0	6.483333333	0
ENSMUSG00000100593	1700119H24Rik	RIKEN cDNA 1700119H24 gene [Source:MGI Symbol;Acc:MGI:1923899]	0.027	-5.217014981	0.000278988	0.001198258	yes	down	2.52	1.79	2.24	0	0	0	2.183333333	0
ENSMUSG00000070368	Prok1	prokineticin 1 [Source:MGI Symbol;Acc:MGI:2180370]	0.081	-3.63186441	0.000282062	0.00121005	yes	down	0.79	0.97	0.68	0.06	0	0.02	0.813333333	0.026666667
ENSMUSG00000043903	Gm22	predicted gene 22 [Source:MGI Symbol;Acc:MGI:2684868]	73.508	6.199834242	0.000286048	0.001225722	yes	up	0	0	0	0.04	0.03	0.03	0	0.033333333
MSTRG.22247		-	29.332	4.874405217	0.000289797	0.00124034	yes	up	0.05	0.02	0.07	0.16	0	0.74	0.046666667	0.3
ENSMUSG00000006143	Upk3bl	uroplakin 3B-like [Source:MGI Symbol;Acc:MGI:1916915]	82.754	6.370765743	0.000297238	0.001269529	yes	up	0	0	0	0.52	0.32	0.08	0	0.306666667
ENSMUSG00000030762	Aqp8	aquaporin 8 [Source:MGI Symbol;Acc:MGI:1195271]	0.028	-5.133950725	0.000300178	0.001281257	yes	down	1	1.08	0.83	0	0	0	0.97	0
ENSMUSG00000030302	Atp2b2	ATPase, Ca++ transporting, plasma membrane 2 [Source:MGI Symbol;Acc:MGI:105368]	0.056	-4.156802046	0.000312251	0.001329942	yes	down	0.2	0.24	0.13	0	0	0	0.19	0
ENSMUSG00000033860	Fgg	fibrinogen gamma chain [Source:MGI Symbol;Acc:MGI:95526]	28.469	4.831317139	0.000318644	0.001355114	yes	up	1.24	1.26	0.16	9.84	0.2	4.85	0.886666667	4.963333333
ENSMUSG00000086474	9130204K15Rik	RIKEN cDNA 9130204K15 gene [Source:MGI Symbol;Acc:MGI:2441733]	0.029	-5.118948671	0.000318677	0.001355114	yes	down	2.27	1.82	1.41	0	0	0	1.833333333	0
ENSMUSG00000112542	AC160413.2	-	75.61	6.240512554	0.000319129	0.001356724	yes	up	0	0	0	0.03	0.06	0.06	0	0.05
MSTRG.31289		-	20.583	4.363406022	0.000320023	0.001359895	yes	up	0.18	0.2	0	0.4	0.92	0.32	0.126666667	0.546666667
MSTRG.25141		-	0.041	-4.602313209	0.000321308	0.001364724	yes	down	1.4	0.3	0.62	0	0.02	0	0.773333333	0.006666667
ENSMUSG00000021313	Ryr2	ryanodine receptor 2, cardiac [Source:MGI Symbol;Acc:MGI:99685]	0.029	-5.119670584	0.000325234	0.001380615	yes	down	0.18	0.06	0.05	0	0	0	0.096666667	0
MSTRG.8708		-	0.026	-5.270235773	0.000330339	0.001399848	yes	down	0.65	0.89	0.19	0	0	0	0.576666667	0
ENSMUSG00000091972	Tmem207	transmembrane protein 207 [Source:MGI Symbol;Acc:MGI:2685386]	0.029	-5.112211885	0.000341087	0.001441408	yes	down	0.55	0.42	0.46	0	0	0	0.476666667	0
MSTRG.8036		-	0.028	-5.155640313	0.000345242	0.00145707	yes	down	0.8	0.91	0.91	0	0	0	0.873333333	0
ENSMUSG00000004473	Clec11a	C-type lectin domain family 11, member a [Source:MGI Symbol;Acc:MGI:1298219]	0.037	-4.739625182	0.000352816	0.001485512	yes	down	0.61	0.52	0.34	0	0	0.01	0.49	0.003333333
ENSMUSG00000085772	D630024D03Rik	RIKEN cDNA D630024D03 gene [Source:MGI Symbol;Acc:MGI:3041224]	0.052	-4.278811403	0.000361417	0.001517903	yes	down	8.24	3.35	2.95	0	0	0.14	4.846666667	0.046666667
ENSMUSG00000109274	Gm45133	predicted gene 45133 [Source:MGI Symbol;Acc:MGI:5753709]	17.537	4.13235145	0.000366292	0.001535921	yes	up	0.09	0	0	0.12	0.11	0.07	0.03	0.1
ENSMUSG00000094598	Gm24694	predicted gene, 24694 [Source:MGI Symbol;Acc:MGI:5454471]	0.027	-5.216805275	0.00038603	0.001610239	yes	down	3.17	3.49	4.79	0	0	0	3.816666667	0
ENSMUSG00000034528	Hsd17b13	hydroxysteroid (17-beta) dehydrogenase 13 [Source:MGI Symbol;Acc:MGI:2140804]	0.018	-5.829922795	0.000388111	0.001618553	yes	down	2.91	0.37	0.14	0	0	0	1.14	0
ENSMUSG00000025789	St8sia2	ST8 alpha-N-acetyl-neuraminide alpha-2,8-sialyltransferase 2 [Source:MGI Symbol;Acc:MGI:106020]	10.569	3.40183163	0.000393318	0.001638039	yes	up	0.01	0.03	0.01	0.04	0.04	0.03	0.016666667	0.036666667
ENSMUSG00000110235	Gm5086	predicted gene 5086 [Source:MGI Symbol;Acc:MGI:3644417]	75.36	6.235722932	0.000394346	0.001641948	yes	up	0.03	0	0	0.2	0.48	0	0.01	0.226666667
ENSMUSG00000027322	Siglec1	sialic acid binding Ig-like lectin 1, sialoadhesin [Source:MGI Symbol;Acc:MGI:99668]	38.398	5.262954638	0.000408073	0.001695645	yes	up	0.01	0	0.01	0.08	0.02	0.01	0.006666667	0.036666667
ENSMUSG00000040693	Slco4c1	solute carrier organic anion transporter family, member 4C1 [Source:MGI Symbol;Acc:MGI:2442784]	0.081	-3.633581524	0.000424679	0.001757498	yes	down	1.01	0.18	0.68	0.01	0	0.03	0.623333333	0.013333333
ENSMUSG00000087639	Gm15512	predicted gene 15512 [Source:MGI Symbol;Acc:MGI:3782960]	18.381	4.200179408	0.000428655	0.001773155	yes	up	0	0.08	0	0.11	0.14	0.08	0.026666667	0.11
ENSMUSG00000028965	Tnfrsf9	tumor necrosis factor receptor superfamily, member 9 [Source:MGI Symbol;Acc:MGI:1101059]	32.329	5.01474957	0.000448003	0.001847784	yes	up	0.02	0.03	0	0.17	0.07	0.04	0.016666667	0.093333333
MSTRG.12036		-	16.383	4.034129931	0.000450616	0.001857315	yes	up	0.2	0	0.13	0.45	0.89	0.14	0.11	0.493333333
ENSMUSG00000002500	Rpl3l	ribosomal protein L3-like [Source:MGI Symbol;Acc:MGI:1913461]	0.024	-5.363771746	0.000470735	0.00193417	yes	down	1.36	2.83	0.33	0	0	0	1.506666667	0
ENSMUSG00000024989	Cep55	centrosomal protein 55 [Source:MGI Symbol;Acc:MGI:1921357]	21.682	4.438457115	0.000482095	0.001977751	yes	up	0	0.03	0.03	0.13	0.05	0.11	0.02	0.096666667
ENSMUSG00000036144	Meox2	mesenchyme homeobox 2 [Source:MGI Symbol;Acc:MGI:103219]	40.669	5.345849204	0.000483905	0.001983406	yes	up	0	0.03	0	0.06	0.03	0.16	0.01	0.083333333
ENSMUSG00000040797	Iqsec3	IQ motif and Sec7 domain 3 [Source:MGI Symbol;Acc:MGI:2677208]	18.543	4.212827099	0.000492254	0.002014484	yes	up	0.02	0.01	0	0.05	0.02	0.01	0.01	0.026666667
MSTRG.10553		-	0.04	-4.656111162	0.000504674	0.002062556	yes	down	6.52	6.07	3.14	0.12	0	0	5.243333333	0.04
ENSMUSG00000020218	Wif1	Wnt inhibitory factor 1 [Source:MGI Symbol;Acc:MGI:1344332]	0.029	-5.132020474	0.000504986	0.002063374	yes	down	1.17	0.48	0.33	0	0	0	0.66	0
ENSMUSG00000095042	Gm12537	predicted gene 12537 [Source:MGI Symbol;Acc:MGI:3650720]	0.03	-5.048272195	0.00051833	0.002113824	yes	down	1.12	1.75	0.65	0	0	0	1.173333333	0
ENSMUSG00000057074	Ces1g	carboxylesterase 1G [Source:MGI Symbol;Acc:MGI:88378]	0.03	-5.056416073	0.000527378	0.002147068	yes	down	1.47	0.23	0.62	0.01	0	0	0.773333333	0.003333333
MSTRG.6305		-	0.029	-5.128835877	0.000530242	0.002156981	yes	down	0.29	0.75	0.38	0	0	0	0.473333333	0
ENSMUSG00000099848	Gm29337	predicted gene 29337 [Source:MGI Symbol;Acc:MGI:5580043]	30.521	4.931733575	0.000531514	0.002160724	yes	up	0	0.12	0.12	0.88	0.24	0.57	0.08	0.563333333
ENSMUSG00000074647	Fam83c	family with sequence similarity 83, member C [Source:MGI Symbol;Acc:MGI:1918655]	28.638	4.839858547	0.000546013	0.002212328	yes	up	0.01	0	0.01	0.06	0.05	0.02	0.006666667	0.043333333
MSTRG.21539		-	71.578	6.161442019	0.000551945	0.002235377	yes	up	0	0	0	1.52	5.1	1.6	0	2.74
MSTRG.6223		-	34.378	5.103423057	0.000558383	0.002256975	yes	up	3.79	0	0	0.06	6.46	8.33	1.263333333	4.95
ENSMUSG00000062727	Hist1h2bk	histone cluster 1, H2bk [Source:MGI Symbol;Acc:MGI:2448399]	0.086	-3.540299009	0.000569466	0.002296222	yes	down	6.13	10.74	6.02	0.29	0	0.21	7.63	0.166666667
ENSMUSG00000078300	Gm2606	predicted pseudogene 2606 [Source:MGI Symbol;Acc:MGI:3780774]	0.03	-5.081754622	0.000576654	0.00232215	yes	down	0.79	1.85	0.87	0	0	0	1.17	0
MSTRG.17380		-	10.154	3.343945166	0.000577187	0.002323789	yes	up	304.32	365.59	727.92	2627.61	1090.02	298.51	465.9433333	1338.713333
ENSMUSG00000076937	Iglc2	immunoglobulin lambda constant 2 [Source:MGI Symbol;Acc:MGI:99547]	0.033	-4.906316197	0.000591548	0.002375883	yes	down	6.38	6.33	1.04	0.16	0	0	4.583333333	0.053333333
ENSMUSG00000068699	Flnc	filamin C, gamma [Source:MGI Symbol;Acc:MGI:95557]	10.805	3.433669041	0.000593298	0.002381869	yes	up	0	0.04	0.01	0.04	0.1	0.01	0.016666667	0.05
MSTRG.17450		-	0.029	-5.12821985	0.000600708	0.002407413	yes	down	1.11	0.68	0.23	0	0	0	0.673333333	0
ENSMUSG00000090113	Nhlrc4	NHL repeat containing 4 [Source:MGI Symbol;Acc:MGI:3687200]	0.056	-4.158081781	0.000607993	0.002434488	yes	down	1.52	0.57	1.09	0	0	0.03	1.06	0.01
ENSMUSG00000022126	Acod1	aconitate decarboxylase 1 [Source:MGI Symbol;Acc:MGI:103206]	36.173	5.176830298	0.000608904	0.002437072	yes	up	0	0.03	0	0.11	0.11	0.01	0.01	0.076666667
MSTRG.19349		-	38.759	5.276452421	0.00061447	0.002457746	yes	up	0	0.35	0	1.89	1	0	0.116666667	0.963333333
ENSMUSG00000105419	Gm43205	predicted gene 43205 [Source:MGI Symbol;Acc:MGI:5663342]	0.093	-3.424903906	0.000619989	0.002478743	yes	down	0.99	1.02	0.64	0	0.02	0.04	0.883333333	0.02
MSTRG.2621		-	12.175	3.605895898	0.000630624	0.002517429	yes	up	0.32	0.06	0.63	0.62	2.27	0.66	0.336666667	1.183333333
MSTRG.29972		-	0.029	-5.108176473	0.000633373	0.002527305	yes	down	1.51	3.09	2.77	0	0	0	2.456666667	0
MSTRG.9205		-	66.823	6.062264916	0.000638113	0.002544566	yes	up	0	0	0	0.31	0.71	0.56	0	0.526666667
ENSMUSG00000100459	Gm5833	predicted gene 5833 [Source:MGI Symbol;Acc:MGI:3779530]	54.768	5.775271793	0.00063832	0.002544838	yes	up	0	0	0.02	0.04	0.04	0.17	0.006666667	0.083333333
ENSMUSG00000043263	Ifi209	interferon activated gene 209 [Source:MGI Symbol;Acc:MGI:2138243]	10.774	3.429527752	0.000644008	0.002565846	yes	up	0.07	0.05	0.02	0.16	0.16	0.01	0.046666667	0.11
ENSMUSG00000059060	Rad51b	RAD51 paralog B [Source:MGI Symbol;Acc:MGI:1099436]	45.66	5.512845022	0.000649323	0.002584222	yes	up	0	0	0.06	0.34	0.12	0.23	0.02	0.23
ENSMUSG00000017002	Slpi	secretory leukocyte peptidase inhibitor [Source:MGI Symbol;Acc:MGI:109297]	12.178	3.606228805	0.000660756	0.002625745	yes	up	0.15	0.7	0.05	0.25	1.07	0.1	0.3	0.473333333
ENSMUSG00000079620	Muc4	mucin 4 [Source:MGI Symbol;Acc:MGI:2153525]	17.079	4.094164807	0.000669028	0.002656321	yes	up	0	0.03	0	0.08	0.04	0.15	0.01	0.09
ENSMUSG00000022877	Hrg	histidine-rich glycoprotein [Source:MGI Symbol;Acc:MGI:2146636]	0.059	-4.093089539	0.000677022	0.002682394	yes	down	0.78	1.1	1.14	0.02	0	0.02	1.006666667	0.013333333
ENSMUSG00000089942	Pira2	paired-Ig-like receptor A2 [Source:MGI Symbol;Acc:MGI:1195970]	13.018	3.702421119	0.000678747	0.002687364	yes	up	0.04	0.04	0.02	0.23	0.18	0.01	0.033333333	0.14
ENSMUSG00000023336	Wfdc1	WAP four-disulfide core domain 1 [Source:MGI Symbol;Acc:MGI:1915116]	0.087	-3.520637258	0.000689733	0.00272558	yes	down	1.56	2.1	0.7	0.05	0.03	0	1.453333333	0.026666667
ENSMUSG00000033963	Fancd2os	Fancd2 opposite strand [Source:MGI Symbol;Acc:MGI:1918229]	0.042	-4.566901912	0.000690029	0.002726164	yes	down	1.08	1.22	0.88	0	0	0.04	1.06	0.013333333
ENSMUSG00000087052	Gm8093	predicted gene 8093 [Source:MGI Symbol;Acc:MGI:3642975]	69.416	6.117196211	0.000707557	0.002789419	yes	up	0	0	0	0.2	0.17	0.04	0	0.136666667
MSTRG.31455		-	78.787	6.299890568	0.000708777	0.00279363	yes	up	0	0	0.04	0	0.17	0.59	0.013333333	0.253333333
ENSMUSG00000020312	Shc2	SHC (Src homology 2 domain containing) transforming protein 2 [Source:MGI Symbol;Acc:MGI:106180]	11.697	3.548029625	0.00072294	0.002843358	yes	up	0.03	0.04	0	0.04	0.06	0.08	0.023333333	0.06
ENSMUSG00000069893	9930111J21Rik1	RIKEN cDNA 9930111J21 gene 1 [Source:MGI Symbol;Acc:MGI:3041173]	19.645	4.296079234	0.000738128	0.002894424	yes	up	0.03	0	0.01	0.08	0.05	0.04	0.013333333	0.056666667
ENSMUSG00000042306	S100a14	S100 calcium binding protein A14 [Source:MGI Symbol;Acc:MGI:1913416]	11.575	3.53289543	0.000738748	0.002896062	yes	up	0.11	0.21	0	0.24	0.2	0.7	0.106666667	0.38
MSTRG.31937		-	11.665	3.544092311	0.000757507	0.002961574	yes	up	0	0.04	0.11	0.21	0.23	0.05	0.05	0.163333333
ENSMUSG00000085747	Slc13a2os	solute carrier family 13 (sodium-dependent dicarboxylate transporter), member 2, opposite strand [Source:MGI Symbol;Acc:MGI:3649278]	28.512	4.833500751	0.000766471	0.002990964	yes	up	0.01	0.01	0	0.04	0.08	0.02	0.006666667	0.046666667
ENSMUSG00000018930	Ccl4	chemokine (C-C motif) ligand 4 [Source:MGI Symbol;Acc:MGI:98261]	16.972	4.085068684	0.000774496	0.003019717	yes	up	0	0.16	0.16	0.85	0.42	0.16	0.106666667	0.476666667
ENSMUSG00000046491	C1qtnf2	C1q and tumor necrosis factor related protein 2 [Source:MGI Symbol;Acc:MGI:1916433]	0.091	-3.463564593	0.000812694	0.003155195	yes	down	1.9	2.05	1.54	0	0	0.11	1.83	0.036666667
ENSMUSG00000070323	Mmp27	matrix metallopeptidase 27 [Source:MGI Symbol;Acc:MGI:3039232]	102.968	6.686048387	0.000817304	0.003169078	yes	up	0	0	0	0.11	0	0.15	0	0.086666667
ENSMUSG00000001021	S100a3	S100 calcium binding protein A3 [Source:MGI Symbol;Acc:MGI:1338849]	69.343	6.115682904	0.000817695	0.003169927	yes	up	0	0	0	0.41	0.41	0.07	0	0.296666667
MSTRG.26702		-	0.058	-4.099210253	0.000824621	0.00319072	yes	down	1.98	0.92	1.05	0.05	0	0	1.316666667	0.016666667
MSTRG.21491		-	10.669	3.415317876	0.000834114	0.003226093	yes	up	1.83	0.53	0.55	4.23	3.3	0	0.97	2.51
ENSMUSG00000054545	Ugt1a6a	UDP glucuronosyltransferase 1 family, polypeptide A6A [Source:MGI Symbol;Acc:MGI:2137698]	0.004	-7.8561555	0.000847967	0.003273477	yes	down	4.94	4.89	0.04	0	0	0	3.29	0
ENSMUSG00000086387	Gm15563	predicted gene 15563 [Source:MGI Symbol;Acc:MGI:3783012]	0.033	-4.912081502	0.000887256	0.00341154	yes	down	4.28	7.58	3.95	0	0	0	5.27	0
ENSMUSG00000085203	Gm12927	predicted gene 12927 [Source:MGI Symbol;Acc:MGI:3651776]	0.034	-4.870905603	0.000911773	0.003498491	yes	down	6.81	9.26	4.28	0	0	0	6.783333333	0
MSTRG.17066		-	0.021	-5.586186142	0.000920246	0.003527324	yes	down	0.74	0.13	1.55	0	0	0	0.806666667	0
ENSMUSG00000095207	CR974586.1	-	0.044	-4.498735209	0.000923187	0.003537858	yes	down	0.57	0.6	0.51	0	0	0.02	0.56	0.006666667
ENSMUSG00000031877	Ces2g	carboxylesterase 2G [Source:MGI Symbol;Acc:MGI:1919611]	0.039	-4.673842106	0.000928836	0.003557283	yes	down	0.94	0.42	0.2	0.01	0	0	0.52	0.003333333
MSTRG.9966		-	0.032	-4.983252388	0.000929253	0.003558137	yes	down	1.12	1.01	1.53	0	0	0	1.22	0
ENSMUSG00000110386	Gm42031	predicted gene, 42031 [Source:MGI Symbol;Acc:MGI:5624916]	36.948	5.207405043	0.000936482	0.003583577	yes	up	0.1	2.77	3.04	0.14	10.69	1.8	1.97	4.21
ENSMUSG00000080921	Rpl38-ps2	ribosomal protein L38, pseudogene 2 [Source:MGI Symbol;Acc:MGI:3646625]	43.738	5.450814468	0.000939948	0.003594598	yes	up	0	0	4.6	38.68	45.95	0	1.533333333	28.21
ENSMUSG00000031097	Tnni2	troponin I, skeletal, fast 2 [Source:MGI Symbol;Acc:MGI:105070]	20.214	4.337248995	0.000974848	0.003718012	yes	up	0.11	0.37	0	0.41	0.1	0.34	0.16	0.283333333
MSTRG.8147		-	82.326	6.363273283	0.000999911	0.003797846	yes	up	0	0	0	0.46	0.06	0.05	0	0.19
ENSMUSG00000025058	5430427O19Rik	RIKEN cDNA 5430427O19 gene [Source:MGI Symbol;Acc:MGI:1918648]	17.505	4.129655061	0.001013076	0.003843877	yes	up	0.01	0.02	0.02	0.08	0.14	0	0.016666667	0.073333333
ENSMUSG00000029843	Slc13a4	solute carrier family 13 (sodium/sulfate symporters), member 4 [Source:MGI Symbol;Acc:MGI:2442367]	0.062	-4.02272456	0.001023049	0.003878518	yes	down	0.69	0.55	0.21	0.02	0	0	0.483333333	0.006666667
MSTRG.9752		-	0.034	-4.874843711	0.001024567	0.00388347	yes	down	1.56	1.4	1.67	0	0	0	1.543333333	0
ENSMUSG00000024401	Tnf	tumor necrosis factor [Source:MGI Symbol;Acc:MGI:104798]	11.635	3.540380861	0.001049642	0.003971146	yes	up	0.03	0.11	0.02	0.22	0.09	0.08	0.053333333	0.13
ENSMUSG00000074284	Gm10658	predicted gene 10658 [Source:MGI Symbol;Acc:MGI:3642856]	0.093	-3.426086757	0.001054529	0.003985533	yes	down	2.16	1.64	1.48	0	0	0.1	1.76	0.033333333
ENSMUSG00000029816	Gpnmb	glycoprotein (transmembrane) nmb [Source:MGI Symbol;Acc:MGI:1934765]	25.198	4.655265655	0.001076764	0.004064559	yes	up	0.01	0.02	0	0.01	0.16	0.04	0.01	0.07
ENSMUSG00000026347	Tmem163	transmembrane protein 163 [Source:MGI Symbol;Acc:MGI:1919410]	0.033	-4.934143808	0.001096138	0.004124988	yes	down	0.22	0.76	0.2	0	0	0	0.393333333	0
ENSMUSG00000109783	Gm45338	predicted gene 45338 [Source:MGI Symbol;Acc:MGI:5791174]	16.45	4.040002134	0.001107167	0.004164787	yes	up	0.04	0	0.12	0.14	0.45	0.38	0.053333333	0.323333333
ENSMUSG00000109764	Klkb1	kallikrein B, plasma 1 [Source:MGI Symbol;Acc:MGI:102849]	0.068	-3.870626594	0.001109041	0.004169276	yes	down	0.36	0.32	0.17	0	0	0.01	0.283333333	0.003333333
ENSMUSG00000046213	Cym	chymosin [Source:MGI Symbol;Acc:MGI:2684977]	0.036	-4.802490073	0.001148843	0.004299567	yes	down	0.7	0.86	0.6	0	0	0	0.72	0
ENSMUSG00000050957	Insl6	insulin-like 6 [Source:MGI Symbol;Acc:MGI:1351595]	0.093	-3.424421086	0.001173344	0.004385017	yes	down	3.76	5.56	1.53	0.07	0	0.14	3.616666667	0.07
ENSMUSG00000005355	Casp14	caspase 14 [Source:MGI Symbol;Acc:MGI:1335092]	60.005	5.907004131	0.00118263	0.004417026	yes	up	0	0	0	0.05	0.03	0.05	0	0.043333333
MSTRG.30058		-	10.071	3.332201214	0.001222207	0.004550053	yes	up	0.04	0.04	0.18	0.46	0.25	0.04	0.086666667	0.25
ENSMUSG00000076613	Ighg2b	immunoglobulin heavy constant gamma 2B [Source:MGI Symbol;Acc:MGI:96445]	0.045	-4.477846259	0.001243733	0.00461897	yes	down	2.16	1.26	0.64	0	0	0.04	1.353333333	0.013333333
ENSMUSG00000017943	Gdap1l1	ganglioside-induced differentiation-associated protein 1-like 1 [Source:MGI Symbol;Acc:MGI:2385163]	62.743	5.971388134	0.001288706	0.004766733	yes	up	0	0	0	0.1	0.08	0.03	0	0.07
MSTRG.13715		-	0.029	-5.098934006	0.001292571	0.004780069	yes	down	1.63	3.21	0.35	0	0	0	1.73	0
ENSMUSG00000106981	Gm45495	predicted gene 45495 [Source:MGI Symbol;Acc:MGI:5791331]	0.047	-4.408290773	0.001301942	0.004810853	yes	down	0.97	0.9	0.4	0.02	0	0	0.756666667	0.006666667
MSTRG.21290		-	0.031	-5.033500157	0.001306473	0.004826628	yes	down	1.48	0.76	2.14	0	0	0	1.46	0
MSTRG.4695		-	0.034	-4.862675318	0.001356425	0.00499311	yes	down	0.88	0.51	0.22	0	0	0	0.536666667	0
ENSMUSG00000063522	2010109I03Rik	RIKEN cDNA 2010109I03 gene [Source:MGI Symbol;Acc:MGI:1914288]	0.039	-4.686428771	0.001381491	0.00507522	yes	down	0.18	0.4	0.56	0.01	0	0	0.38	0.003333333
ENSMUSG00000036492	Rnf39	ring finger protein 39 [Source:MGI Symbol;Acc:MGI:2156378]	15.48	3.9523431	0.001401888	0.005140908	yes	up	0.03	0	0.07	0.07	0.15	0.17	0.033333333	0.13
ENSMUSG00000090713	Gm8127	predicted gene 8127 [Source:MGI Symbol;Acc:MGI:3646865]	11.94	3.577790674	0.001402382	0.005141696	yes	up	0.17	0.05	0.05	0.33	0.24	0.33	0.09	0.3
ENSMUSG00000026587	Astn1	astrotactin 1 [Source:MGI Symbol;Acc:MGI:1098567]	0.037	-4.738729762	0.001449175	0.005293241	yes	down	0.12	0.09	0.08	0	0	0	0.096666667	0
ENSMUSG00000074259	Gramd2	GRAM domain containing 2 [Source:MGI Symbol;Acc:MGI:3528937]	16.182	4.016298665	0.001463113	0.005338808	yes	up	0.01	0.05	0.01	0.11	0.07	0	0.023333333	0.06
MSTRG.11603		-	0.035	-4.824487947	0.001473605	0.005371762	yes	down	1.52	1.32	0.41	0	0	0	1.083333333	0
ENSMUSG00000065952	C330021F23Rik	RIKEN cDNA C330021F23 gene [Source:MGI Symbol;Acc:MGI:3612471]	0.068	-3.878953443	0.001476856	0.005382168	yes	down	1.95	1.26	1.38	0	0	0.08	1.53	0.026666667
ENSMUSG00000075044	Slc22a29	solute carrier family 22. member 29 [Source:MGI Symbol;Acc:MGI:3605624]	0.034	-4.878071514	0.001478788	0.005386783	yes	down	0.82	0.73	0.26	0	0	0	0.603333333	0
ENSMUSG00000088088	Rmrp	RNA component of mitochondrial RNAase P [Source:MGI Symbol;Acc:MGI:97937]	11.279	3.495604282	0.001505879	0.005473136	yes	up	5.43	0.95	1.8	15.28	2.02	3.81	2.726666667	7.036666667
ENSMUSG00000025330	Padi4	peptidyl arginine deiminase, type IV [Source:MGI Symbol;Acc:MGI:1338898]	0.031	-5.031442159	0.001530741	0.005552524	yes	down	1.41	0.03	1.68	0.02	0	0	1.04	0.006666667
ENSMUSG00000032661	Oas3	2'-5' oligoadenylate synthetase 3 [Source:MGI Symbol;Acc:MGI:2180850]	24.675	4.624959187	0.00153757	0.005573802	yes	up	0.02	0.01	0.01	0.03	0.22	0	0.013333333	0.083333333
ENSMUSG00000031382	Asb11	ankyrin repeat and SOCS box-containing 11 [Source:MGI Symbol;Acc:MGI:1916104]	0.038	-4.728763178	0.001564567	0.005659591	yes	down	0.55	0.76	0.46	0	0	0	0.59	0
ENSMUSG00000059674	Cdh24	cadherin-like 24 [Source:MGI Symbol;Acc:MGI:1928330]	10.976	3.456305803	0.001566868	0.005666477	yes	up	0	0.06	0.04	0.06	0.04	0.15	0.033333333	0.083333333
MSTRG.5224		-	71.193	6.15365929	0.001567087	0.005666477	yes	up	0	0.44	3.9	4.72	15.66	3.32	1.446666667	7.9
ENSMUSG00000000560	Gabra2	gamma-aminobutyric acid (GABA) A receptor, subunit alpha 2 [Source:MGI Symbol;Acc:MGI:95614]	62.227	5.959479403	0.001610882	0.005805425	yes	up	0	0	0	0.01	0.02	0.02	0	0.016666667
MSTRG.14532		-	0.088	-3.505796111	0.001620362	0.005838447	yes	down	1.71	0.63	0.66	0	0	0.05	1	0.016666667
MSTRG.25657		-	89.652	6.486256928	0.001720262	0.006158578	yes	up	0	0	0	0.68	0	1.24	0	0.64
ENSMUSG00000041708	Mpped1	metallophosphoesterase domain containing 1 [Source:MGI Symbol;Acc:MGI:106316]	0.092	-3.437990924	0.001747208	0.006246533	yes	down	0.59	0.35	0.47	0	0.03	0	0.47	0.01
ENSMUSG00000044103	Il1f9	interleukin 1 family, member 9 [Source:MGI Symbol;Acc:MGI:2449929]	60.03	5.907604023	0.001776773	0.006343596	yes	up	0	0	0	0.09	0.02	0.07	0	0.06
MSTRG.31288		-	31.079	4.957867006	0.001777376	0.006344518	yes	up	0	0.01	0	0.02	0.08	0.02	0.003333333	0.04
ENSMUSG00000042351	Grap2	GRB2-related adaptor protein 2 [Source:MGI Symbol;Acc:MGI:1333842]	54.934	5.779625952	0.001778756	0.006348211	yes	up	0	0.01	0	0.04	0.13	0	0.003333333	0.056666667
MSTRG.26629		-	0.051	-4.288600547	0.001801535	0.00642452	yes	down	1.53	1.26	0.72	0	0	0.04	1.17	0.013333333
ENSMUSG00000078496	Zfp982	zinc finger protein 982 [Source:MGI Symbol;Acc:MGI:3701121]	41.283	5.367480992	0.001814247	0.006464838	yes	up	0.03	0	0	0.03	0.2	0.1	0.01	0.11
ENSMUSG00000030147	Clec4b1	C-type lectin domain family 4, member b1 [Source:MGI Symbol;Acc:MGI:1917060]	13.825	3.789224232	0.001826092	0.006498228	yes	up	0.15	0.08	0.08	0.19	0.66	0.13	0.103333333	0.326666667
ENSMUSG00000046699	Slitrk4	SLIT and NTRK-like family, member 4 [Source:MGI Symbol;Acc:MGI:2442509]	10.633	3.410445153	0.001846359	0.006561463	yes	up	0.03	0.02	0	0.01	0.01	0.05	0.016666667	0.023333333
MSTRG.25138		-	13.386	3.742655983	0.001857948	0.006597681	yes	up	0.11	0	0.06	0.24	0.2	0.14	0.056666667	0.193333333
ENSMUSG00000031137	Fgf13	fibroblast growth factor 13 [Source:MGI Symbol;Acc:MGI:109178]	69.356	6.115939203	0.001862211	0.006610129	yes	up	0	0	0	0.01	0.13	0.08	0	0.073333333
ENSMUSG00000021795	Sftpd	surfactant associated protein D [Source:MGI Symbol;Acc:MGI:109515]	84.86	6.407011091	0.001865141	0.006619251	yes	up	0	0	0	0.17	0	0.15	0	0.106666667
MSTRG.8982		-	54.877	5.778129408	0.001869215	0.00663243	yes	up	0.02	0	0.11	0.31	0.06	1.38	0.043333333	0.583333333
ENSMUSG00000007107	Atp1a4	ATPase, Na+/K+ transporting, alpha 4 polypeptide [Source:MGI Symbol;Acc:MGI:1351335]	20.205	4.336614845	0.001876405	0.006654091	yes	up	0.02	0.13	0	1.69	0.14	0.01	0.05	0.613333333
MSTRG.19953		-	0.024	-5.394131623	0.001880693	0.006665439	yes	down	1.83	0.6	0.05	0	0	0	0.826666667	0
ENSMUSG00000021388	Aspn	asporin [Source:MGI Symbol;Acc:MGI:1913945]	0.072	-3.800435805	0.001889111	0.006692695	yes	down	0.56	0.69	0.53	0	0.03	0	0.593333333	0.01
ENSMUSG00000046999	1110032F04Rik	RIKEN cDNA 1110032F04 gene [Source:MGI Symbol;Acc:MGI:1915975]	0.038	-4.705812455	0.00190017	0.006727984	yes	down	0.37	0.39	0.14	0	0	0	0.3	0
MSTRG.9441		-	0.073	-3.777191945	0.001912902	0.006767852	yes	down	0.78	0.43	0.25	0.01	0	0.01	0.486666667	0.006666667
ENSMUSG00000040985	Sun3	Sad1 and UNC84 domain containing 3 [Source:MGI Symbol;Acc:MGI:3041199]	0.051	-4.283430619	0.001943339	0.006859701	yes	down	1.85	1.4	0.79	0	0.04	0	1.346666667	0.013333333
MSTRG.11731		-	0.098	-3.349349912	0.002100556	0.007369381	yes	down	0.86	1.45	0.68	0.07	0	0	0.996666667	0.023333333
ENSMUSG00000081665	Gm15922	predicted gene 15922 [Source:MGI Symbol;Acc:MGI:3802148]	10.004	3.322562012	0.002113315	0.0074099	yes	up	0.04	0.1	0	0.2	0.08	0.05	0.046666667	0.11
ENSMUSG00000090165	Ugt1a10	UDP glycosyltransferase 1 family, polypeptide A10 [Source:MGI Symbol;Acc:MGI:3580642]	0.053	-4.24624796	0.002135592	0.007478028	yes	down	17.15	11.63	4.28	0.07	0	0.25	11.02	0.106666667
ENSMUSG00000054191	Klf1	Kruppel-like factor 1 (erythroid) [Source:MGI Symbol;Acc:MGI:1342771]	0.068	-3.87098197	0.002147216	0.007508093	yes	down	0.88	0.74	1.04	0.05	0	0	0.886666667	0.016666667
ENSMUSG00000087047	1700110K17Rik	RIKEN cDNA 1700110K17 gene [Source:MGI Symbol;Acc:MGI:1920808]	55.975	5.806712864	0.002172064	0.007585514	yes	up	0	0	0	0.18	0.21	0.05	0	0.146666667
ENSMUSG00000023982	Guca1a	guanylate cyclase activator 1a (retina) [Source:MGI Symbol;Acc:MGI:102770]	25.051	4.646813146	0.002237976	0.007797929	yes	up	0.06	0	0.05	0.05	0.27	0.31	0.036666667	0.21
ENSMUSG00000032473	Cldn18	claudin 18 [Source:MGI Symbol;Acc:MGI:1929209]	0.041	-4.605241466	0.002283474	0.007945919	yes	down	0.19	0.18	0.11	0	0	0	0.16	0
ENSMUSG00000113495	CT573034.3	-	0.039	-4.66211648	0.00229005	0.007965786	yes	down	0.59	0.34	0.21	0	0	0	0.38	0
ENSMUSG00000030237	Slco1a4	solute carrier organic anion transporter family, member 1a4 [Source:MGI Symbol;Acc:MGI:1351896]	0.04	-4.64375294	0.002304458	0.008008329	yes	down	0.25	0.22	0.09	0	0	0	0.186666667	0
ENSMUSG00000032564	Cpne4	copine IV [Source:MGI Symbol;Acc:MGI:1921270]	0.041	-4.600758493	0.002337497	0.008105041	yes	down	0.2	0.22	0.15	0	0	0	0.19	0
ENSMUSG00000091562	Crybg3	beta-gamma crystallin domain containing 3 [Source:MGI Symbol;Acc:MGI:2676311]	58.097	5.860402009	0.002344144	0.008124747	yes	up	0	0	0	0.01	0.06	0.02	0	0.03
ENSMUSG00000064137	Rhox8	reproductive homeobox 8 [Source:MGI Symbol;Acc:MGI:3579898]	16.284	4.025417968	0.00239574	0.008286394	yes	up	0	0.07	0.03	0.1	0.21	0.09	0.033333333	0.133333333
MSTRG.8679		-	13.033	3.704133539	0.002454856	0.008470152	yes	up	1.78	0	0	2.18	1.91	0.69	0.593333333	1.593333333
ENSMUSG00000076934	Iglv1	immunoglobulin lambda variable 1 [Source:MGI Symbol;Acc:MGI:96530]	0.034	-4.872847659	0.002502618	0.008623619	yes	down	4.44	3.76	0.49	0	0	0	2.896666667	0
MSTRG.10937		-	0.053	-4.233906353	0.002608741	0.008950721	yes	down	1.86	3.49	1.81	0.08	0	0	2.386666667	0.026666667
ENSMUSG00000095348	Gm3892	predicted gene 3892 [Source:MGI Symbol;Acc:MGI:3782065]	0.04	-4.658735578	0.002646948	0.009066585	yes	down	0.22	0.14	0.21	0	0	0	0.19	0
ENSMUSG00000097345	AA543186	expressed sequence AA543186 [Source:MGI Symbol;Acc:MGI:3035233]	0.04	-4.650762407	0.0026627	0.009114253	yes	down	0.48	0.32	0.47	0	0	0	0.423333333	0
ENSMUSG00000111110	AC163342.1	-	83.007	6.375163459	0.002663343	0.009114253	yes	up	0	0	0	0.08	0	0.16	0	0.08
MSTRG.7370		-	0.039	-4.677832676	0.002689818	0.009198008	yes	down	3.24	1.57	2.72	0	0	0	2.51	0
MSTRG.23102		-	11.028	3.463042735	0.002717567	0.00928254	yes	up	0	0.03	0.16	0.25	0.15	0.15	0.063333333	0.183333333
ENSMUSG00000102411	Gm36936	predicted gene, 36936 [Source:MGI Symbol;Acc:MGI:5610164]	29.3	4.872815794	0.002729198	0.009315346	yes	up	0.01	0.03	0	0.04	0	0.17	0.013333333	0.07
ENSMUSG00000026580	Selp	selectin, platelet [Source:MGI Symbol;Acc:MGI:98280]	23.575	4.55916281	0.002730854	0.009319268	yes	up	0	0.06	0	0.04	0.1	0.03	0.02	0.056666667
ENSMUSG00000025317	Car5a	carbonic anhydrase 5a, mitochondrial [Source:MGI Symbol;Acc:MGI:101946]	0.075	-3.742339912	0.002782929	0.009481141	yes	down	2.66	1.46	1.09	0.13	0	0	1.736666667	0.043333333
ENSMUSG00000076612	Ighg2c	immunoglobulin heavy constant gamma 2C [Source:MGI Symbol;Acc:MGI:2686979]	0.054	-4.220575264	0.002821441	0.009594568	yes	down	1.7	0.8	0.8	0.04	0	0	1.1	0.013333333
MSTRG.13313		-	0.037	-4.740824171	0.002893692	0.009814853	yes	down	0.75	1.08	0.17	0	0	0	0.666666667	0
MSTRG.9020		-	0.055	-4.176479922	0.002907006	0.009856375	yes	down	1.57	0.88	0.88	0	0	0.04	1.11	0.013333333
MSTRG.13890		-	0.038	-4.731316309	0.002913476	0.00987103	yes	down	0.31	0.75	0.75	0	0	0	0.603333333	0
ENSMUSG00000074345	Tnfaip8l3	tumor necrosis factor, alpha-induced protein 8-like 3 [Source:MGI Symbol;Acc:MGI:2685363]	23.88	4.577728684	0.002924833	0.00990221	yes	up	0.01	0.01	0	0.01	0.05	0.03	0.006666667	0.03
ENSMUSG00000103793	Pcdhga6	protocadherin gamma subfamily A, 6 [Source:MGI Symbol;Acc:MGI:1935218]	0.033	-4.90157271	0.002939748	0.009943552	yes	down	0.22	0.04	0.2	0	0	0	0.153333333	0
ENSMUSG00000040569	Slc26a7	solute carrier family 26, member 7 [Source:MGI Symbol;Acc:MGI:2384791]	0.033	-4.921772434	0.002964201	0.010018891	yes	down	0.39	0.07	0.05	0	0	0	0.17	0
ENSMUSG00000057135	Scimp	SLP adaptor and CSK interacting membrane protein [Source:MGI Symbol;Acc:MGI:3610314]	13.16	3.718104104	0.003032545	0.010210476	yes	up	0.23	0	0.08	0.41	0.24	0.04	0.103333333	0.23
ENSMUSG00000057262	Gm10020	predicted pseudogene 10020 [Source:MGI Symbol;Acc:MGI:3642192]	402.282	8.652062525	0.003065877	0.010305718	yes	up	0	0.2	0	7.56	0	7.15	0.066666667	4.903333333
MSTRG.12614		-	42.54	5.410731202	0.003070934	0.01032083	yes	up	0	0.05	0.13	0.18	0.94	0.19	0.06	0.436666667
MSTRG.2271		-	32.044	5.001961765	0.003085771	0.010365011	yes	up	3.34	0	0.13	4.26	15.97	4.1	1.156666667	8.11
ENSMUSG00000022002	Erich6b	glutamate rich 6B [Source:MGI Symbol;Acc:MGI:1922522]	0.033	-4.907238906	0.003089959	0.010373393	yes	down	1.7	0.32	0.59	0	0	0	0.87	0
ENSMUSG00000094772	Rpl29-ps2	ribosomal protein L29, pseudogene 2 [Source:MGI Symbol;Acc:MGI:3648624]	0.04	-4.64682957	0.003100511	0.010404981	yes	down	1.04	0.67	0.95	0	0	0	0.886666667	0
ENSMUSG00000033063	Cntnap3	contactin associated protein-like 3 [Source:MGI Symbol;Acc:MGI:3588199]	53.588	5.743837568	0.003104269	0.01041193	yes	up	0	0	0.01	39.2	0	6.87	0.003333333	15.35666667
ENSMUSG00000100733	4932411K12Rik	RIKEN cDNA 4932411K12 gene [Source:MGI Symbol;Acc:MGI:3512682]	55.439	5.792822616	0.003114923	0.010445757	yes	up	0	0	0	0.02	0.01	0.04	0	0.023333333
MSTRG.13933		-	53.369	5.737922667	0.003116033	0.010447574	yes	up	0	0	0	0.09	0.2	0.16	0	0.15
MSTRG.19301		-	0.043	-4.525289225	0.003143746	0.010525138	yes	down	1.06	0.77	0.63	0	0	0	0.82	0
ENSMUSG00000046623	Gjb4	gap junction protein, beta 4 [Source:MGI Symbol;Acc:MGI:95722]	36.346	5.183705452	0.003183586	0.010635282	yes	up	0.01	0	0	0.04	0.01	0.08	0.003333333	0.043333333
ENSMUSG00000087500	Gm12426	predicted gene 12426 [Source:MGI Symbol;Acc:MGI:3650989]	0.042	-4.583700293	0.003240694	0.010816236	yes	down	0.32	0.43	0.44	0	0	0	0.396666667	0
ENSMUSG00000042453	Reln	reelin [Source:MGI Symbol;Acc:MGI:103022]	0.042	-4.556809831	0.003250862	0.010838369	yes	down	0.2	0.25	0.09	0	0	0	0.18	0
ENSMUSG00000046719	Nxph3	neurexophilin 3 [Source:MGI Symbol;Acc:MGI:1336188]	0.041	-4.596554815	0.00328629	0.010938635	yes	down	0.59	0.32	0.16	0	0	0	0.356666667	0
MSTRG.5129		-	0.058	-4.097582777	0.003326732	0.011061966	yes	down	1.6	1.65	0.79	0.03	0	0	1.346666667	0.01
ENSMUSG00000107451	Gm44421	predicted gene, 44421 [Source:MGI Symbol;Acc:MGI:5690813]	0.057	-4.125756818	0.003327554	0.011061966	yes	down	1.28	1.08	0.47	0	0	0.03	0.943333333	0.01
ENSMUSG00000079071	Gm14085	predicted gene 14085 [Source:MGI Symbol;Acc:MGI:3702173]	26.426	4.723871136	0.00334852	0.01112764	yes	up	0.01	0.01	0	0.02	0.01	0.07	0.006666667	0.033333333
MSTRG.15360		-	0.043	-4.530648671	0.003411923	0.011315841	yes	down	0.79	0.54	0.28	0	0	0	0.536666667	0
ENSMUSG00000078627	10-Mar	membrane-associated ring finger (C3HC4) 10 [Source:MGI Symbol;Acc:MGI:2443469]	0.039	-4.669073032	0.003412851	0.01131688	yes	down	0.46	0.23	0.08	0	0	0	0.256666667	0
ENSMUSG00000022949	Clic6	chloride intracellular channel 6 [Source:MGI Symbol;Acc:MGI:2146607]	26.831	4.74580746	0.003478684	0.011506127	yes	up	0.01	0	0.01	0.06	0.07	0	0.006666667	0.043333333
ENSMUSG00000113334	AC113508.1	-	14.999	3.906786611	0.003497492	0.011555672	yes	up	0.04	0	0.02	0.06	0.08	0.08	0.02	0.073333333
ENSMUSG00000070690	5830473C10Rik	RIKEN cDNA 5830473C10 gene [Source:MGI Symbol;Acc:MGI:1923342]	0.085	-3.552539249	0.003532761	0.011658575	yes	down	0.31	0.63	0.34	0	0	0.02	0.426666667	0.006666667
ENSMUSG00000043843	Tmem145	transmembrane protein 145 [Source:MGI Symbol;Acc:MGI:3607779]	44.719	5.482828587	0.003538085	0.011671111	yes	up	0	0.05	0	0.14	0.33	0	0.016666667	0.156666667
ENSMUSG00000091813	Ces2h	carboxylesterase 2H [Source:MGI Symbol;Acc:MGI:3648740]	0.045	-4.488830699	0.003549431	0.011706438	yes	down	0.34	0.25	0.19	0	0	0	0.26	0
ENSMUSG00000086216	Gm13610	predicted gene 13610 [Source:MGI Symbol;Acc:MGI:3651297]	78.17	6.288547858	0.003648476	0.012005106	yes	up	0	0	0	0	0.4	0.11	0	0.17
MSTRG.5610		-	26.564	4.731376974	0.003818034	0.012482607	yes	up	0.26	0	0	0.82	0	0.51	0.086666667	0.443333333
ENSMUSG00000015627	Gata5	GATA binding protein 5 [Source:MGI Symbol;Acc:MGI:109497]	0.06	-4.047212566	0.00383991	0.012549666	yes	down	0.36	0.29	0.18	0	0	0.01	0.276666667	0.003333333
MSTRG.19621		-	0.045	-4.480073253	0.003855572	0.012596374	yes	down	2.63	1.63	1.21	0	0	0	1.823333333	0
ENSMUSG00000113506	AC166358.6	-	51.34	5.682009444	0.003867467	0.01263075	yes	up	0	0.01	0	0.03	0.12	0.07	0.003333333	0.073333333
MSTRG.14136		-	0.049	-4.350394253	0.003883757	0.012679447	yes	down	0.64	0.14	0.49	0.01	0	0	0.423333333	0.003333333
ENSMUSG00000027399	Il1a	interleukin 1 alpha [Source:MGI Symbol;Acc:MGI:96542]	51.225	5.678776155	0.003891009	0.012698612	yes	up	0	0	0	0.07	0.02	0.04	0	0.043333333
ENSMUSG00000108852	Gm44911	predicted gene 44911 [Source:MGI Symbol;Acc:MGI:5753487]	51.225	5.678776155	0.003891009	0.012698612	yes	up	0	0	0	0.14	0.03	0.06	0	0.076666667
MSTRG.21019		-	0.045	-4.464390546	0.003923997	0.012797187	yes	down	1.11	0.76	0.61	0	0	0	0.826666667	0
MSTRG.777		-	0.04	-4.651748544	0.003928968	0.012811126	yes	down	1.2	0.63	1.57	0	0	0	1.133333333	0
ENSMUSG00000084964	Gm15503	predicted gene 15503 [Source:MGI Symbol;Acc:MGI:3782950]	49.265	5.62249825	0.003933093	0.012818239	yes	up	0	0	0	0.05	0.55	0.02	0	0.206666667
ENSMUSG00000095463	Entpd4	ectonucleoside triphosphate diphosphohydrolase 4 [Source:MGI Symbol;Acc:MGI:1914714]	0.044	-4.492293251	0.003956731	0.012878812	yes	down	8.4	0.21	5.16	0.07	0.03	0.06	4.59	0.053333333
ENSMUSG00000031142	Cacna1f	calcium channel, voltage-dependent, alpha 1F subunit [Source:MGI Symbol;Acc:MGI:1859639]	55.978	5.806799826	0.003988168	0.012971109	yes	up	0	0	0	0.01	0.03	0.01	0	0.016666667
ENSMUSG00000028197	Col24a1	collagen, type XXIV, alpha 1 [Source:MGI Symbol;Acc:MGI:1918605]	0.044	-4.496536602	0.003999674	0.013002475	yes	down	0.21	0.3	0.21	0	0	0	0.24	0
MSTRG.696		-	73.914	6.207775397	0.004003939	0.013007143	yes	up	0	0	0	2.27	0	4.81	0	2.36
ENSMUSG00000097289	2010300F17Rik	RIKEN cDNA 2010300F17 gene [Source:MGI Symbol;Acc:MGI:1917134]	73.914	6.207775397	0.004003939	0.013007143	yes	up	0	0	0	0.12	0	0.08	0	0.066666667
ENSMUSG00000090860	Gm17134	predicted gene 17134 [Source:MGI Symbol;Acc:MGI:4937961]	73.914	6.207775397	0.004003939	0.013007143	yes	up	0	0	0	0.53	0	1.13	0	0.553333333
ENSMUSG00000109765	Gm18227	predicted gene, 18227 [Source:MGI Symbol;Acc:MGI:5010412]	19.823	4.309107002	0.004094909	0.01328389	yes	up	0.03	0	0.03	0.05	0.13	0.08	0.02	0.086666667
ENSMUSG00000095300	Gm906	predicted gene 906 [Source:MGI Symbol;Acc:MGI:2685752]	0.045	-4.465931685	0.004244095	0.013721852	yes	down	0.28	0.22	0.1	0	0	0	0.2	0
MSTRG.31456		-	73.474	6.199159866	0.004345025	0.013998945	yes	up	0	0	0	1.08	5.7	0	0	2.26
ENSMUSG00000086998	Gm16033	predicted gene 16033 [Source:MGI Symbol;Acc:MGI:3802076]	49.286	5.623101087	0.004360633	0.014041849	yes	up	0	0	0	0.16	0.37	0.14	0	0.223333333
ENSMUSG00000044288	Cnr1	cannabinoid receptor 1 (brain) [Source:MGI Symbol;Acc:MGI:104615]	66.765	6.061023317	0.004364865	0.014048135	yes	up	0	0	0	0.03	0.02	0	0	0.016666667
ENSMUSG00000112858	Gm10332	RING finger protein 212B [Source:UniProtKB/Swiss-Prot;Acc:D3Z423]	0.045	-4.477372265	0.004372417	0.014067478	yes	down	1.87	1.54	0.55	0	0	0	1.32	0
ENSMUSG00000045662	Henmt1	HEN1 methyltransferase homolog 1 (Arabidopsis) [Source:MGI Symbol;Acc:MGI:1913965]	0.044	-4.498301543	0.004384827	0.014094497	yes	down	0.37	0.69	0.21	0	0	0	0.423333333	0
ENSMUSG00000097464	Gm26736	predicted gene, 26736 [Source:MGI Symbol;Acc:MGI:5477230]	15.045	3.911166122	0.00443702	0.014232988	yes	up	0.04	0.03	0.3	0.43	0	0.93	0.123333333	0.453333333
ENSMUSG00000041737	Tmem45b	transmembrane protein 45b [Source:MGI Symbol;Acc:MGI:2384574]	0.095	-3.399889141	0.004442804	0.014249054	yes	down	5.69	9.18	6.81	0.16	0	0.26	7.226666667	0.14
ENSMUSG00000026601	Axdnd1	axonemal dynein light chain domain containing 1 [Source:MGI Symbol;Acc:MGI:1924602]	0.046	-4.454769101	0.004518203	0.01445306	yes	down	1.29	0.68	0.72	0	0	0	0.896666667	0
ENSMUSG00000022021	Diaph3	diaphanous related formin 3 [Source:MGI Symbol;Acc:MGI:1927222]	17.326	4.114900335	0.004552633	0.014553072	yes	up	0	0	0.03	0.09	0.08	0.01	0.01	0.06
ENSMUSG00000086763	Plxna4os1	plexin A4, opposite strand 1 [Source:MGI Symbol;Acc:MGI:2442851]	21.656	4.436671274	0.004573896	0.014613877	yes	up	0	0	0.04	0.03	0.13	0.05	0.013333333	0.07
ENSMUSG00000087236	Gm1305	predicted gene 1305 [Source:MGI Symbol;Acc:MGI:2686151]	81.963	6.356898501	0.004599536	0.014681986	yes	up	0	0	0	25.15	0	0.01	0	8.386666667
MSTRG.9915		-	41.229	5.365578187	0.004600148	0.014681986	yes	up	0	0	0.37	2.93	1.63	0	0.123333333	1.52
MSTRG.10170		-	0.062	-4.001682828	0.004623767	0.014749689	yes	down	1.72	2.3	1.2	0.07	0	0	1.74	0.023333333
ENSMUSG00000025488	Cox8b	cytochrome c oxidase subunit VIIIb [Source:MGI Symbol;Acc:MGI:105958]	38.772	5.276935184	0.004639556	0.014792354	yes	up	0	0	0.32	0.31	0.34	2.28	0.106666667	0.976666667
ENSMUSG00000040649	Rimklb	ribosomal modification protein rimK-like family member B [Source:MGI Symbol;Acc:MGI:1918325]	42.309	5.402903861	0.00472665	0.015028345	yes	up	0	0	0.01	0.06	0	0.05	0.003333333	0.036666667
ENSMUSG00000042662	Dusp15	dual specificity phosphatase-like 15 [Source:MGI Symbol;Acc:MGI:1934928]	0.063	-3.980733755	0.004744443	0.015068343	yes	down	0.55	0.59	0.3	0.01	0	0	0.48	0.003333333
ENSMUSG00000110353	Gm45531	predicted gene 45531 [Source:MGI Symbol;Acc:MGI:5791367]	0.047	-4.396582596	0.004744801	0.015068343	yes	down	0.59	0.47	0.33	0	0	0	0.463333333	0
ENSMUSG00000092837	Rpph1	ribonuclease P RNA component H1 [Source:MGI Symbol;Acc:MGI:1934664]	18.051	4.173979187	0.004744967	0.015068343	yes	up	0	0	12.47	65.72	6.79	6.39	4.156666667	26.3
ENSMUSG00000100486	Gm4131	predicted gene 4131 [Source:MGI Symbol;Acc:MGI:3782307]	0.09	-3.474877882	0.004776403	0.015147244	yes	down	1.51	0.81	0.89	0.03	0	0.04	1.07	0.023333333
ENSMUSG00000036658	Olfr11	olfactory receptor 11 [Source:MGI Symbol;Acc:MGI:104715]	12.346	3.625998606	0.004932765	0.015578624	yes	up	0	0.1	0.01	0.16	0.01	0.11	0.036666667	0.093333333
MSTRG.29750		-	10.071	3.332168947	0.004939327	0.015593991	yes	up	0.5	6.08	0.33	2.9	4.02	6.48	2.303333333	4.466666667
ENSMUSG00000099794	1700128A07Rik	RIKEN cDNA 1700128A07 gene [Source:MGI Symbol;Acc:MGI:1920881]	51.412	5.684033487	0.005052448	0.015915601	yes	up	0.34	0	0	0.27	4.13	0	0.113333333	1.466666667
MSTRG.13793		-	22.688	4.503835927	0.005110765	0.016063526	yes	up	0.5	0.62	7.07	23.75	38.44	0.95	2.73	21.04666667
MSTRG.2249		-	0.05	-4.329424218	0.005115595	0.016075962	yes	down	0.85	1.49	0.11	0.03	0	0	0.816666667	0.01
ENSMUSG00000039269	2300002M23Rik	RIKEN cDNA 2300002M23 gene [Source:MGI Symbol;Acc:MGI:1916792]	0.047	-4.417876064	0.005129984	0.016112918	yes	down	0.84	0.53	0.28	0	0	0	0.55	0
ENSMUSG00000070574	2310016G11Rik	RIKEN cDNA 2310016G11 gene [Source:MGI Symbol;Acc:MGI:1916828]	0.046	-4.436320957	0.005152479	0.016175282	yes	down	1.14	0.66	0.9	0	0	0	0.9	0
MSTRG.26058		-	0.048	-4.368353503	0.005170591	0.016216608	yes	down	0.77	0.65	0.46	0	0	0	0.626666667	0
ENSMUSG00000066364	Serpina3b	serine (or cysteine) peptidase inhibitor, clade A, member 3B [Source:MGI Symbol;Acc:MGI:2182835]	0.064	-3.957954231	0.00522309	0.016357853	yes	down	0.57	0.46	0.27	0.02	0	0	0.433333333	0.006666667
ENSMUSG00000055555	4930502E18Rik	RIKEN cDNA 4930502E18 gene [Source:MGI Symbol;Acc:MGI:1922263]	0.064	-3.95607992	0.005228179	0.016371002	yes	down	0.65	0.83	0.5	0.03	0	0	0.66	0.01
MSTRG.15989		-	11.069	3.468410653	0.005413581	0.016902617	yes	up	0.03	0.07	0.02	0.22	0.07	0.02	0.04	0.103333333
ENSMUSG00000062410	Hsd3b3	hydroxy-delta-5-steroid dehydrogenase, 3 beta- and steroid delta-isomerase 3 [Source:MGI Symbol;Acc:MGI:96235]	0.095	-3.400413579	0.005432414	0.016949907	yes	down	15.56	25.77	11.08	0.03	0.15	0.81	17.47	0.33
ENSMUSG00000053714	4732471J01Rik	RIKEN cDNA 4732471J01 gene [Source:MGI Symbol;Acc:MGI:3603586]	0.09	-3.475294059	0.005530764	0.017215872	yes	down	2.6	1.82	1.56	0.08	0	0	1.993333333	0.026666667
ENSMUSG00000051985	Igfn1	immunoglobulin-like and fibronectin type III domain containing 1 [Source:MGI Symbol;Acc:MGI:3045352]	0.065	-3.940455708	0.005672086	0.017617002	yes	down	0.37	0.35	0.39	0	0	0.02	0.37	0.006666667
MSTRG.23764		-	0.049	-4.357939131	0.005685341	0.017655186	yes	down	0.45	0.3	0.28	0	0	0	0.343333333	0
ENSMUSG00000051367	Six1	sine oculis-related homeobox 1 [Source:MGI Symbol;Acc:MGI:102780]	40.025	5.322840481	0.005729062	0.017760961	yes	up	0	0	0.01	0.05	0	0.05	0.003333333	0.033333333
ENSMUSG00000112300	AC160405.1	-	0.066	-3.917443572	0.005731998	0.017764072	yes	down	0.73	0.6	0.43	0	0.03	0	0.586666667	0.01
MSTRG.25672		-	16.531	4.047081641	0.005774268	0.017883016	yes	up	0	0.91	0.2	0.53	1.3	2.79	0.37	1.54
ENSMUSG00000050069	Grem2	gremlin 2, DAN family BMP antagonist [Source:MGI Symbol;Acc:MGI:1344367]	0.043	-4.545588636	0.00585502	0.018102615	yes	down	0.36	0.14	0.06	0	0	0	0.186666667	0
MSTRG.32247		-	75.787	6.243879871	0.005897622	0.018222078	yes	up	0	0	0	0	0.88	0.08	0	0.32
MSTRG.3500		-	0.089	-3.488823457	0.005944834	0.018337134	yes	down	0.29	0.54	0.17	0	0	0.02	0.333333333	0.006666667
ENSMUSG00000110221	Gm36210	predicted gene, 36210 [Source:MGI Symbol;Acc:MGI:5595369]	0.093	-3.428989428	0.005970374	0.01840665	yes	down	0.67	0.46	0.51	0	0	0.03	0.546666667	0.01
ENSMUSG00000028270	Gbp2	guanylate binding protein 2 [Source:MGI Symbol;Acc:MGI:102772]	66.914	6.064229302	0.006024576	0.018542666	yes	up	0	0.28	0	0.49	3.41	0.33	0.093333333	1.41
MSTRG.31287		-	28.839	4.849938699	0.006034325	0.018569561	yes	up	0	0.02	0	0	0.14	0.02	0.006666667	0.053333333
ENSMUSG00000026358	Rgs1	regulator of G-protein signaling 1 [Source:MGI Symbol;Acc:MGI:1354694]	12.409	3.633349033	0.006131022	0.01882617	yes	up	0.03	0.03	0.09	0.78	0.99	0	0.05	0.59
ENSMUSG00000023828	Slc22a3	solute carrier family 22 (organic cation transporter), member 3 [Source:MGI Symbol;Acc:MGI:1333817]	0.049	-4.342730391	0.006159833	0.018905165	yes	down	0.13	0.21	0.13	0	0	0	0.156666667	0
ENSMUSG00000086589	Gm12915	predicted gene 12915 [Source:MGI Symbol;Acc:MGI:3650273]	0.048	-4.386230878	0.006202237	0.019023467	yes	down	0.34	0.39	0.46	0	0	0	0.396666667	0
MSTRG.4876		-	0.05	-4.328579229	0.006216468	0.019056717	yes	down	4.81	4.25	2.01	0	0	0	3.69	0
ENSMUSG00000030854	Ptpn5	protein tyrosine phosphatase, non-receptor type 5 [Source:MGI Symbol;Acc:MGI:97807]	0.046	-4.448886151	0.006254438	0.019157148	yes	down	0.12	0.17	0.23	0	0	0	0.173333333	0
MSTRG.3536		-	0.09	-3.470460641	0.00628171	0.019234271	yes	down	1.02	1.67	0.95	0	0.08	0	1.213333333	0.026666667
ENSMUSG00000068373	D430041D05Rik	RIKEN cDNA D430041D05 gene [Source:MGI Symbol;Acc:MGI:2181743]	64.848	6.01899459	0.006301929	0.019283335	yes	up	0	0	0	0.02	0	0.04	0	0.02
ENSMUSG00000057715	A830018L16Rik	RIKEN cDNA A830018L16 gene [Source:MGI Symbol;Acc:MGI:2444149]	64.848	6.01899459	0.006301929	0.019283335	yes	up	0	0	0	0.5	0	0.73	0	0.41
ENSMUSG00000108431	Gm44963	predicted gene 44963 [Source:MGI Symbol;Acc:MGI:5753539]	0.048	-4.394963755	0.006366091	0.019453767	yes	down	1.21	0.74	1.21	0	0	0	1.053333333	0
ENSMUSG00000081143	Gm15823	predicted gene 15823 [Source:MGI Symbol;Acc:MGI:3801858]	0.084	-3.56494752	0.006410866	0.019571077	yes	down	1.25	3.2	2.86	0.08	0.08	0	2.436666667	0.053333333
ENSMUSG00000020331	Hcn2	hyperpolarization-activated, cyclic nucleotide-gated K+ 2 [Source:MGI Symbol;Acc:MGI:1298210]	0.046	-4.43828397	0.006474845	0.019749996	yes	down	0.11	0.34	0.12	0	0	0	0.19	0
ENSMUSG00000070291	Ddx43	DEAD (Asp-Glu-Ala-Asp) box polypeptide 43 [Source:MGI Symbol;Acc:MGI:3642857]	16.296	4.026424455	0.006491729	0.01979493	yes	up	0.04	0	0.02	0.03	0.17	0.02	0.02	0.073333333
ENSMUSG00000086289	Gm16933	predicted gene, 16933 [Source:MGI Symbol;Acc:MGI:4439857]	0.06	-4.069937453	0.006504945	0.019831938	yes	down	0.21	0.49	0.51	0.02	0	0	0.403333333	0.006666667
MSTRG.30071		-	0.092	-3.435954059	0.006555392	0.019956774	yes	down	0.54	0.66	0.29	0.03	0	0	0.496666667	0.01
ENSMUSG00000029814	Igf2bp3	insulin-like growth factor 2 mRNA binding protein 3 [Source:MGI Symbol;Acc:MGI:1890359]	60.141	5.910287987	0.006565302	0.019976205	yes	up	0	0	0	0.21	0.13	0	0	0.113333333
ENSMUSG00000095028	Sirpb1b	signal-regulatory protein beta 1B [Source:MGI Symbol;Acc:MGI:3779828]	60.141	5.910287987	0.006565302	0.019976205	yes	up	0	0	0	0.1	0.09	0	0	0.063333333
ENSMUSG00000071550	Cfap44	cilia and flagella associated protein 44 [Source:MGI Symbol;Acc:MGI:1277238]	10.848	3.439315923	0.006579375	0.020009092	yes	up	0	0.03	0.02	0.11	0.1	0.04	0.016666667	0.083333333
ENSMUSG00000108219	Gm44101	predicted gene, 44101 [Source:MGI Symbol;Acc:MGI:5690493]	0.05	-4.329419786	0.006605646	0.020085665	yes	down	0.24	0.39	0.16	0	0	0	0.263333333	0
ENSMUSG00000053706	B430305J03Rik	RIKEN cDNA B430305J03 gene [Source:MGI Symbol;Acc:MGI:3697707]	67.278	6.072068991	0.006645224	0.020202669	yes	up	0	0	0	0.02	0	0.05	0	0.023333333
MSTRG.19140		-	0.046	-4.443617747	0.006690742	0.02031418	yes	down	0.77	0.27	0.18	0	0	0	0.406666667	0
ENSMUSG00000043740	B430306N03Rik	RIKEN cDNA B430306N03 gene [Source:MGI Symbol;Acc:MGI:2443478]	44.492	5.475457885	0.006873255	0.020803053	yes	up	0	0	0	0.02	0.01	0.02	0	0.016666667
ENSMUSG00000055430	Nap1l5	nucleosome assembly protein 1-like 5 [Source:MGI Symbol;Acc:MGI:1923555]	0.045	-4.481527256	0.006953165	0.021013781	yes	down	0.45	0.14	0.41	0	0	0	0.333333333	0
ENSMUSG00000027596	a	nonagouti [Source:MGI Symbol;Acc:MGI:87853]	23.605	4.56101302	0.007008206	0.021155785	yes	up	0.15	0.47	0	0.31	0.61	0	0.206666667	0.306666667
MSTRG.10130		-	48.794	5.608638935	0.007016661	0.021174355	yes	up	0	0	0	0.24	0.26	0.99	0	0.496666667
ENSMUSG00000041669	Prima1	proline rich membrane anchor 1 [Source:MGI Symbol;Acc:MGI:1926097]	0.066	-3.922424454	0.007127895	0.021467749	yes	down	1.3	1.67	0.5	0	0.05	0	1.156666667	0.016666667
MSTRG.11879		-	60.076	5.908713181	0.007136649	0.021490595	yes	up	0	0	0	0.18	0.09	0	0	0.09
ENSMUSG00000066682	Pilrb2	paired immunoglobin-like type 2 receptor beta 2 [Source:MGI Symbol;Acc:MGI:2450535]	14.104	3.81802316	0.007287397	0.021890765	yes	up	0.02	0.22	0	0.71	0.09	0.09	0.08	0.296666667
ENSMUSG00000087042	Gm11611	predicted gene 11611 [Source:MGI Symbol;Acc:MGI:3707011]	0.061	-4.033897883	0.00731512	0.021956106	yes	down	0.47	0.58	1	0.03	0	0	0.683333333	0.01
ENSMUSG00000022054	Nefm	neurofilament, medium polypeptide [Source:MGI Symbol;Acc:MGI:97314]	17.724	4.147599588	0.007352077	0.022049037	yes	up	0	0.01	0.01	0.02	0.05	0.02	0.006666667	0.03
MSTRG.20056		-	0.051	-4.284342063	0.007421456	0.02222448	yes	down	7.21	7.04	2.75	0	0	0	5.666666667	0
ENSMUSG00000105541	Gm43136	predicted gene 43136 [Source:MGI Symbol;Acc:MGI:5663273]	18.299	4.19369713	0.007436523	0.022265974	yes	up	0	0	0.17	0.33	0.27	0.26	0.056666667	0.286666667
ENSMUSG00000097658	Gm16755	predicted gene, 16755 [Source:MGI Symbol;Acc:MGI:4439679]	0.047	-4.400528824	0.007446967	0.022293615	yes	down	0.59	0.58	1.01	0	0	0	0.726666667	0
ENSMUSG00000031098	Syt8	synaptotagmin VIII [Source:MGI Symbol;Acc:MGI:1859867]	23.201	4.536120112	0.007505798	0.022444156	yes	up	0	0.08	0	0.42	0.09	0.19	0.026666667	0.233333333
ENSMUSG00000034959	Rubcnl	RUN and cysteine rich domain containing beclin 1 interacting protein like [Source:MGI Symbol;Acc:MGI:2685590]	18.299	4.193676375	0.007516799	0.022469742	yes	up	0.01	0.01	0	0.05	0.05	0.01	0.006666667	0.036666667
ENSMUSG00000027801	Tm4sf4	transmembrane 4 superfamily member 4 [Source:MGI Symbol;Acc:MGI:2385173]	0.052	-4.251902662	0.007527147	0.022493363	yes	down	0.44	0.42	0.31	0	0	0	0.39	0
MSTRG.1158		-	13.852	3.79199769	0.007645552	0.022810121	yes	up	0.24	0.09	0	0.34	0	0.52	0.11	0.286666667
ENSMUSG00000097047	1110020A21Rik	RIKEN cDNA 1110020A21 gene [Source:MGI Symbol;Acc:MGI:1915781]	0.063	-3.996412594	0.007710071	0.022950473	yes	down	0.8	1.15	1.7	0	0.06	0	1.216666667	0.02
ENSMUSG00000079605	Zbtb9	zinc finger and BTB domain containing 9 [Source:MGI Symbol;Acc:MGI:1918022]	0.09	-3.468585856	0.007814338	0.023227001	yes	down	1.01	0.84	0.07	0	0.04	0	0.64	0.013333333
MSTRG.19190		-	13.656	3.771456466	0.007841761	0.023297214	yes	up	3.51	0	3.51	7.23	15.91	3.68	2.34	8.94
ENSMUSG00000026616	Cr2	complement receptor 2 [Source:MGI Symbol;Acc:MGI:88489]	0.049	-4.340362598	0.007925224	0.023510988	yes	down	0.16	0.06	0.24	0	0	0	0.153333333	0
MSTRG.4758		-	0.091	-3.45096696	0.007929454	0.023515946	yes	down	1	0.49	0.9	0	0	0.05	0.796666667	0.016666667
MSTRG.32253		-	16.707	4.062380183	0.007949824	0.023572555	yes	up	0	0.16	0	0.26	0.23	0.05	0.053333333	0.18
ENSMUSG00000051728	4930563D23Rik	RIKEN cDNA 4930563D23 gene [Source:MGI Symbol;Acc:MGI:1922578]	0.067	-3.903218503	0.007951337	0.02357324	yes	down	0.3	0.22	0.35	0	0	0.01	0.29	0.003333333
ENSMUSG00000050050	Ccdc158	coiled-coil domain containing 158 [Source:MGI Symbol;Acc:MGI:2444555]	0.07	-3.844953301	0.007979236	0.023638537	yes	down	1.91	0.88	1.5	0	0	0.01	1.43	0.003333333
ENSMUSG00000021214	Akr1c18	aldo-keto reductase family 1, member C18 [Source:MGI Symbol;Acc:MGI:2145420]	0.087	-3.528537574	0.0080093	0.023703041	yes	down	26.36	44.28	9.47	0.5	1.22	0	26.70333333	0.573333333
MSTRG.20256		-	0.095	-3.400229608	0.008070243	0.023875714	yes	down	2.65	1.63	1.85	0.16	0	0	2.043333333	0.053333333
ENSMUSG00000013974	Mcemp1	mast cell expressed membrane protein 1 [Source:MGI Symbol;Acc:MGI:1916439]	17.342	4.116163775	0.008239193	0.024336391	yes	up	0.03	0.03	0	0.07	0.05	0.08	0.02	0.066666667
MSTRG.31042		-	12.73	3.670173919	0.008255438	0.024364804	yes	up	0	0.27	0.33	0.68	1.55	0	0.2	0.743333333
ENSMUSG00000007682	Dio2	deiodinase, iodothyronine, type II [Source:MGI Symbol;Acc:MGI:1338833]	69.882	6.126848936	0.008270795	0.024398382	yes	up	0	0	0	0	0.01	0.04	0	0.016666667
MSTRG.3966		-	0.098	-3.345643215	0.008276576	0.024410755	yes	down	1.56	1.63	0.83	0	0.09	0	1.34	0.03
MSTRG.36		-	60.187	5.911381583	0.008454526	0.024864583	yes	up	0	0	0	3.1	12.27	0	0	5.123333333
MSTRG.23965		-	0.048	-4.371119474	0.008536953	0.025074914	yes	down	0.56	1.93	0.62	0	0	0	1.036666667	0
ENSMUSG00000033831	Fgb	fibrinogen beta chain [Source:MGI Symbol;Acc:MGI:99501]	18.117	4.179272011	0.008589061	0.025195768	yes	up	0.2	0.58	0.02	1.6	0.01	0.59	0.266666667	0.733333333
ENSMUSG00000068686	Cd59b	CD59b antigen [Source:MGI Symbol;Acc:MGI:1888996]	0.07	-3.841678598	0.008704486	0.025477458	yes	down	5.53	2.13	2.01	0	0.2	0	3.223333333	0.066666667
ENSMUSG00000022595	Lypd2	Ly6/Plaur domain containing 2 [Source:MGI Symbol;Acc:MGI:1915561]	0.071	-3.817106103	0.008892837	0.025987379	yes	down	2.66	4.6	1.56	0	0	0.13	2.94	0.043333333
ENSMUSG00000102049	Zbed6	zinc finger, BED type containing 6 [Source:MGI Symbol;Acc:MGI:3828086]	21.805	4.446567092	0.008945657	0.026125126	yes	up	0	0.02	0	0.05	0.05	0	0.006666667	0.033333333
MSTRG.14655		-	0.053	-4.238604094	0.009040604	0.026371422	yes	down	9.41	10.1	3.28	0	0	0	7.596666667	0
ENSMUSG00000022829	Stxbp5l	syntaxin binding protein 5-like [Source:MGI Symbol;Acc:MGI:2443815]	0.072	-3.79336586	0.009148342	0.026628236	yes	down	0.42	0.52	0.23	0	0.02	0	0.39	0.006666667
MSTRG.8094		-	16.908	4.079651727	0.009200285	0.026749785	yes	up	0.07	0	0.04	0.16	0.16	0.06	0.036666667	0.126666667
ENSMUSG00000031997	Trpc6	transient receptor potential cation channel, subfamily C, member 6 [Source:MGI Symbol;Acc:MGI:109523]	0.053	-4.24588206	0.00924019	0.026831866	yes	down	0.14	0.17	0.19	0	0	0	0.166666667	0
ENSMUSG00000003379	Cd79a	CD79A antigen (immunoglobulin-associated alpha) [Source:MGI Symbol;Acc:MGI:101774]	0.055	-4.179070922	0.009533378	0.027602458	yes	down	0.48	0.46	0.24	0	0	0	0.393333333	0
ENSMUSG00000042367	Gjb3	gap junction protein, beta 3 [Source:MGI Symbol;Acc:MGI:95721]	12.611	3.656574466	0.009547025	0.027631222	yes	up	0.05	0.02	0	0.08	0.07	0.05	0.023333333	0.066666667
ENSMUSG00000101746	2310043L19Rik	RIKEN cDNA 2310043L19 gene [Source:MGI Symbol;Acc:MGI:1922839]	0.049	-4.346061881	0.00969357	0.02798927	yes	down	0.5	1.72	1.19	0	0	0	1.136666667	0
ENSMUSG00000001494	Sost	sclerostin [Source:MGI Symbol;Acc:MGI:1921749]	0.046	-4.443807567	0.00982625	0.028327885	yes	down	0.56	0.41	0.05	0	0	0	0.34	0
ENSMUSG00000032739	Pram1	PML-RAR alpha-regulated adaptor molecule 1 [Source:MGI Symbol;Acc:MGI:3576625]	58.124	5.861060353	0.009829776	0.02833361	yes	up	0	0	0	0	0.1	0.03	0	0.043333333
ENSMUSG00000074646	6430550D23Rik	RIKEN cDNA 6430550D23 gene [Source:MGI Symbol;Acc:MGI:2443361]	0.056	-4.159700866	0.009962675	0.028671734	yes	down	0.68	0.37	0.41	0	0	0	0.486666667	0
MSTRG.31613		-	18.587	4.216237683	0.009986126	0.028725734	yes	up	0.03	0.03	0	0.03	0.05	0.13	0.02	0.07
MSTRG.9332		-	0.054	-4.212855279	0.010131027	0.029097031	yes	down	0.55	0.99	0.33	0	0	0	0.623333333	0
ENSMUSG00000073234	Gm8773	predicted gene 8773 [Source:MGI Symbol;Acc:MGI:3646213]	42.544	5.410876	0.010241795	0.029366234	yes	up	0	0	0	0.03	0.13	0.03	0	0.063333333
MSTRG.31410		-	0.063	-3.987690444	0.010258645	0.029399268	yes	down	0.5	0.31	0.97	0	0	0.03	0.593333333	0.01
ENSMUSG00000027219	Slc28a2	solute carrier family 28 (sodium-coupled nucleoside transporter), member 2 [Source:MGI Symbol;Acc:MGI:1913105]	11.326	3.501538904	0.010279784	0.02944608	yes	up	0.04	0.04	0.01	0	0.24	0.37	0.03	0.203333333
ENSMUSG00000076677	Ighv6-3	immunoglobulin heavy variable 6-3 [Source:MGI Symbol;Acc:MGI:4439854]	53.508	5.74168149	0.010281445	0.029446252	yes	up	0	0	0	0.2	0.22	0	0	0.14
ENSMUSG00000037217	Syn1	synapsin I [Source:MGI Symbol;Acc:MGI:98460]	11.693	3.547602039	0.010332875	0.029565916	yes	up	0	0.02	0.02	0.01	0.09	0.03	0.013333333	0.043333333
MSTRG.10049		-	0.05	-4.310608882	0.010346373	0.029595327	yes	down	0.6	1.23	1.45	0	0	0	1.093333333	0
ENSMUSG00000022376	Adcy8	adenylate cyclase 8 [Source:MGI Symbol;Acc:MGI:1341110]	25.355	4.664170059	0.010356111	0.029613968	yes	up	0	0	0.01	0.02	0.02	0.01	0.003333333	0.016666667
ENSMUSG00000000982	Ccl3	chemokine (C-C motif) ligand 3 [Source:MGI Symbol;Acc:MGI:98260]	26.935	4.751414131	0.010408509	0.029736056	yes	up	0.14	0	0	0.66	0.2	0	0.046666667	0.286666667
ENSMUSG00000096729	Gm13695	predicted gene 13695 [Source:MGI Symbol;Acc:MGI:3702066]	99.601	6.638081832	0.010444413	0.029815466	yes	up	0	0	0	0	10.45	0	0	3.483333333
ENSMUSG00000063446	Plppr1	phospholipid phosphatase related 1 [Source:MGI Symbol;Acc:MGI:2445015]	0.098	-3.344769317	0.010452114	0.02983282	yes	down	0.29	0.54	0.13	0.02	0	0	0.32	0.006666667
ENSMUSG00000045693	Nlrp4e	NLR family, pyrin domain containing 4E [Source:MGI Symbol;Acc:MGI:3056600]	11.521	3.52621116	0.010586894	0.030188634	yes	up	0	0.76	2.59	9.74	1.63	1.61	1.116666667	4.326666667
ENSMUSG00000110781	AC164176.1	-	0.055	-4.177413158	0.010608725	0.030232894	yes	down	1.2	1.4	0.43	0	0	0	1.01	0
ENSMUSG00000089789	Rdh1	retinol dehydrogenase 1 (all trans) [Source:MGI Symbol;Acc:MGI:1195275]	0.048	-4.392350755	0.010881019	0.030903506	yes	down	0.32	0.12	0.03	0	0	0	0.156666667	0
MSTRG.25900		-	15.005	3.907415977	0.010903763	0.030958538	yes	up	0	0.35	0	0.08	1.05	0.22	0.116666667	0.45
MSTRG.17449		-	0.051	-4.293881812	0.011005388	0.031215278	yes	down	1.04	0.32	0.22	0	0	0	0.526666667	0
ENSMUSG00000094162	Ccl19-ps3	chemokine (C-C motif) ligand 19, pseudogene 3 [Source:MGI Symbol;Acc:MGI:1891391]	0.055	-4.1919012	0.011023728	0.031250891	yes	down	5.89	1.97	0.55	0	0.13	0	2.803333333	0.043333333
MSTRG.15965		-	34.448	5.106368192	0.011109094	0.031449254	yes	up	0	0.15	0	0.28	1.21	0	0.05	0.496666667
ENSMUSG00000074489	Bglap3	bone gamma-carboxyglutamate protein 3 [Source:MGI Symbol;Acc:MGI:88155]	0.08	-3.639043804	0.011269288	0.031816714	yes	down	0.66	0.18	2.13	0.07	0.02	0	0.99	0.03
MSTRG.2190		-	12.096	3.596467339	0.011333554	0.031971472	yes	up	0.05	0.15	0.4	0.69	1.81	0.04	0.2	0.846666667
ENSMUSG00000067768	Xlr4b	X-linked lymphocyte-regulated 4B [Source:MGI Symbol;Acc:MGI:1350975]	20.016	4.323068149	0.011343504	0.031989725	yes	up	0.03	0.03	0.05	0.27	0.14	0	0.036666667	0.136666667
ENSMUSG00000110631	Gm45836	predicted gene 45836 [Source:MGI Symbol;Acc:MGI:5804951]	11.169	3.481431621	0.011467651	0.032295252	yes	up	0.01	0.45	0.15	0.1	0.5	0.67	0.203333333	0.423333333
MSTRG.28168		-	943.244	9.881487755	0.011472634	0.03229939	yes	up	0	0	0	0	14.5	15.11	0	9.87
ENSMUSG00000068323	Slc4a5	solute carrier family 4, sodium bicarbonate cotransporter, member 5 [Source:MGI Symbol;Acc:MGI:2443220]	0.055	-4.192558649	0.011499684	0.032364932	yes	down	0.1	0.07	0.11	0	0	0	0.093333333	0
ENSMUSG00000112275	AC122293.2	-	0.071	-3.813748691	0.011501195	0.032364932	yes	down	0.6	0.18	0.28	0.02	0	0	0.353333333	0.006666667
ENSMUSG00000111535	AC153955.5	-	53.669	5.746029377	0.011644639	0.032738529	yes	up	0	0	0	0	0.21	0.11	0	0.106666667
ENSMUSG00000087252	Gm14379	predicted gene 14379 [Source:MGI Symbol;Acc:MGI:3649346]	13.599	3.765379535	0.011766188	0.033034798	yes	up	0.04	0.02	0	0.13	0.04	0.02	0.02	0.063333333
ENSMUSG00000021700	Rab3c	RAB3C, member RAS oncogene family [Source:MGI Symbol;Acc:MGI:1914545]	33.194	5.052849264	0.011782682	0.033076056	yes	up	0	0	0	0	0.01	0.02	0	0.01
MSTRG.4221		-	0.058	-4.108853516	0.011792617	0.033098894	yes	down	0.59	0.7	0.48	0	0	0	0.59	0
MSTRG.2778		-	33.131	5.05010063	0.011830638	0.033190408	yes	up	0	0	0.09	0.26	0	0.46	0.03	0.24
MSTRG.3347		-	0.058	-4.100038322	0.011915149	0.033391838	yes	down	0.39	0.33	0.24	0	0	0	0.32	0
ENSMUSG00000021056	Tex21	testis expressed gene 21 [Source:MGI Symbol;Acc:MGI:1931131]	0.056	-4.150515441	0.012170488	0.034029618	yes	down	0.19	0.29	0.26	0	0	0	0.246666667	0
ENSMUSG00000030825	Hsd17b14	hydroxysteroid (17-beta) dehydrogenase 14 [Source:MGI Symbol;Acc:MGI:1913315]	0.079	-3.654557378	0.012187767	0.034067569	yes	down	0.72	0.68	0.35	0.21	0	0	0.583333333	0.07
ENSMUSG00000035486	Plk5	polo-like kinase 5 [Source:MGI Symbol;Acc:MGI:3026984]	0.056	-4.154507155	0.012328677	0.034414359	yes	down	0.33	0.16	0.23	0	0	0	0.24	0
ENSMUSG00000112324	AC153548.2	-	0.057	-4.143580157	0.012474342	0.03478928	yes	down	0.18	0.15	0.21	0	0	0	0.18	0
MSTRG.14871		-	21.705	4.439949118	0.012562546	0.035024645	yes	up	3.07	2.33	0	3.12	18.5	0	1.8	7.206666667
ENSMUSG00000071532	Gm10335	predicted gene 10335 [Source:MGI Symbol;Acc:MGI:3641693]	92.367	6.529308297	0.012838089	0.03565116	yes	up	0	0	0	2.11	0	0	0	0.703333333
ENSMUSG00000054203	Ifi205	interferon activated gene 205 [Source:MGI Symbol;Acc:MGI:101847]	10.154	3.343915709	0.012932726	0.035883655	yes	up	0.16	0.08	0	0.15	0.43	0	0.08	0.193333333
ENSMUSG00000060019	Gm10073	predicted pseudogene 10073 [Source:MGI Symbol;Acc:MGI:3641908]	17.979	4.168270004	0.012950272	0.035925866	yes	up	0	0	0.28	0.13	0.88	0.42	0.093333333	0.476666667
ENSMUSG00000039748	Exo1	exonuclease 1 [Source:MGI Symbol;Acc:MGI:1349427]	13.192	3.721576078	0.012988251	0.035998639	yes	up	0	0.16	0.13	0.01	0.2	0	0.096666667	0.07
ENSMUSG00000041872	Il17f	interleukin 17F [Source:MGI Symbol;Acc:MGI:2676631]	0.057	-4.143120796	0.013027144	0.036084679	yes	down	0.84	0.53	0.21	0	0	0	0.526666667	0
MSTRG.31607		-	19.203	4.26322344	0.013080487	0.036199716	yes	up	0	0	0.43	0	1.91	0.78	0.143333333	0.896666667
ENSMUSG00000094006	Igkv4-59	immunoglobulin kappa variable 4-59 [Source:MGI Symbol;Acc:MGI:3646808]	0.036	-4.77813286	0.013121286	0.03628532	yes	down	3.44	18.45	0.3	0	0	0	7.396666667	0
ENSMUSG00000020000	Moxd1	monooxygenase, DBH-like 1 [Source:MGI Symbol;Acc:MGI:1921582]	37.748	5.238312649	0.013264828	0.03662718	yes	up	0	0	0	0.02	0.01	0.02	0	0.016666667
MSTRG.10552		-	0.059	-4.086976906	0.01337985	0.036905985	yes	down	0.95	0.81	0.35	0	0	0	0.703333333	0
MSTRG.14628		-	18.605	4.217590486	0.013446834	0.037068506	yes	up	0	1.67	0	4.52	2	0	0.556666667	2.173333333
ENSMUSG00000111116	AC153955.2	-	39.865	5.317059212	0.013475377	0.037130489	yes	up	0	0	0	0.01	0.01	0.03	0	0.016666667
ENSMUSG00000114053	AC133498.1	-	39.865	5.317059212	0.013475377	0.037130489	yes	up	0	0	0	0.06	0.02	0.2	0	0.093333333
ENSMUSG00000058626	Capn11	calpain 11 [Source:MGI Symbol;Acc:MGI:1352490]	39.865	5.317059212	0.013475377	0.037130489	yes	up	0	0	0	1.01	1.14	0.84	0	0.996666667
ENSMUSG00000021303	Gng4	guanine nucleotide binding protein (G protein), gamma 4 [Source:MGI Symbol;Acc:MGI:102703]	0.081	-3.631301387	0.0138439	0.037997877	yes	down	0.33	0.2	0.12	0	0	0.01	0.216666667	0.003333333
ENSMUSG00000016283	H2-M2	histocompatibility 2, M region locus 2 [Source:MGI Symbol;Acc:MGI:95914]	12.29	3.61936452	0.013939336	0.038225589	yes	up	0.07	0.03	0	0.12	0.08	0.02	0.033333333	0.073333333
ENSMUSG00000054672	5830411N06Rik	RIKEN cDNA 5830411N06 gene [Source:MGI Symbol;Acc:MGI:2443685]	0.054	-4.199211734	0.014094589	0.038611026	yes	down	0.19	0.33	0.45	0	0	0	0.323333333	0
ENSMUSG00000044352	Sowaha	sosondowah ankyrin repeat domain family member A [Source:MGI Symbol;Acc:MGI:2687280]	0.061	-4.044328692	0.014189878	0.038837345	yes	down	0.12	0.13	0.1	0	0	0	0.116666667	0
ENSMUSG00000009092	Derl3	Der1-like domain family, member 3 [Source:MGI Symbol;Acc:MGI:1917627]	0.06	-4.056218547	0.014204344	0.038871154	yes	down	0.73	0.43	0.28	0	0	0	0.48	0
ENSMUSG00000054679	Srsf12	serine/arginine-rich splicing factor 12 [Source:MGI Symbol;Acc:MGI:2661424]	23.2	4.536031478	0.014210616	0.038876744	yes	up	0.03	0	0	0.04	0.1	0	0.01	0.046666667
ENSMUSG00000085786	Gm15987	predicted gene 15987 [Source:MGI Symbol;Acc:MGI:3801849]	13.086	3.709899338	0.014217503	0.0388898	yes	up	0.09	0.08	0	0.25	0.45	0	0.056666667	0.233333333
ENSMUSG00000051906	Cd209f	CD209f antigen [Source:MGI Symbol;Acc:MGI:1916392]	22.82	4.51221526	0.014370747	0.039250666	yes	up	0	0.04	0	0.07	0.07	0.06	0.013333333	0.066666667
MSTRG.13855		-	13.144	3.716364106	0.014438604	0.039383269	yes	up	0.05	0.15	0	0.28	0	0.22	0.066666667	0.166666667
MSTRG.28705		-	51.423	5.684333236	0.014521307	0.039579494	yes	up	0	0	0	0	1.88	0.72	0	0.866666667
ENSMUSG00000100642	Gm28230	predicted gene 28230 [Source:MGI Symbol;Acc:MGI:5578936]	0.091	-3.462198524	0.014556719	0.039664255	yes	down	0.12	0.26	0.4	0.02	0	0	0.26	0.006666667
ENSMUSG00000111274	AC121793.1	-	25.348	4.663800759	0.014618692	0.039803627	yes	up	0.1	0	0	0.09	0.45	0.09	0.033333333	0.21
ENSMUSG00000103749	Pcdhgb5	protocadherin gamma subfamily B, 5 [Source:MGI Symbol;Acc:MGI:1935196]	0.061	-4.033610465	0.014670707	0.039927516	yes	down	0.12	0.11	0.06	0	0	0	0.096666667	0
ENSMUSG00000040328	Olfr56	olfactory receptor 56 [Source:MGI Symbol;Acc:MGI:1333785]	12.651	3.66112545	0.014741684	0.040096943	yes	up	0.02	0	0.01	0.02	0.07	0.01	0.01	0.033333333
ENSMUSG00000105719	Gm42872	predicted gene 42872 [Source:MGI Symbol;Acc:MGI:5663009]	0.06	-4.070877377	0.014766236	0.040145909	yes	down	0.19	0.28	0.24	0	0	0	0.236666667	0
ENSMUSG00000030577	Cd22	CD22 antigen [Source:MGI Symbol;Acc:MGI:88322]	10.044	3.328206498	0.01480878	0.040214007	yes	up	0.02	0	0.04	0.03	0.14	0.16	0.02	0.11
ENSMUSG00000057246	BC051142	cDNA sequence BC051142 [Source:MGI Symbol;Acc:MGI:3039565]	10.676	3.416316696	0.014831832	0.040260309	yes	up	0	0.06	0.69	0.54	0.06	1.27	0.25	0.623333333
ENSMUSG00000034493	4930556J24Rik	RIKEN cDNA 4930556J24 gene [Source:MGI Symbol;Acc:MGI:1922592]	0.057	-4.135433982	0.014973777	0.040590128	yes	down	0.86	0.27	0.3	0	0	0	0.476666667	0
MSTRG.22272		-	0.056	-4.146413153	0.015010554	0.040671833	yes	down	0.72	0.43	0.91	0	0	0	0.686666667	0
MSTRG.9144		-	0.076	-3.711406312	0.015103518	0.040869519	yes	down	11.17	4.27	2.48	0	0.29	0	5.973333333	0.096666667
ENSMUSG00000097613	Gm17597	predicted gene, 17597 [Source:MGI Symbol;Acc:MGI:4937231]	0.055	-4.184848657	0.015327698	0.041403023	yes	down	0.63	0.23	0.64	0	0	0	0.5	0
MSTRG.17484		-	0.044	-4.517709465	0.015348065	0.04144586	yes	down	2.32	1.74	0.07	0	0	0	1.376666667	0
ENSMUSG00000104418	Gm37070	predicted gene, 37070 [Source:MGI Symbol;Acc:MGI:5610298]	35.774	5.160827554	0.015433556	0.041621705	yes	up	0	0	0	0.32	0.35	0.22	0	0.296666667
ENSMUSG00000022112	Gpc5	glypican 5 [Source:MGI Symbol;Acc:MGI:1194894]	0.055	-4.178553049	0.015555027	0.041887855	yes	down	0.11	0.28	0.33	0	0	0	0.24	0
ENSMUSG00000040522	Tlr8	toll-like receptor 8 [Source:MGI Symbol;Acc:MGI:2176887]	20.016	4.323080012	0.015833204	0.042543492	yes	up	0.02	0	0	0.01	0.09	0.01	0.006666667	0.036666667
MSTRG.9145		-	0.04	-4.661911112	0.015967165	0.042815848	yes	down	0.22	0.13	1.53	0	0	0	0.626666667	0
MSTRG.29890		-	672.189	9.392723934	0.016287822	0.043529882	yes	up	0	0	0	0	8.37	4.44	0	4.27
ENSMUSG00000005220	Corin	corin [Source:MGI Symbol;Acc:MGI:1349451]	0.083	-3.59381535	0.016343154	0.04366486	yes	down	0.21	0.16	0.06	0	0	0.01	0.143333333	0.003333333
MSTRG.16148		-	0.098	-3.345559301	0.016492525	0.04401917	yes	down	0.95	0.93	0.12	0	0	0.04	0.666666667	0.013333333
MSTRG.18428		-	12.046	3.5905411	0.016522273	0.044072977	yes	up	0.2	0	0.35	0.5	0.18	0.87	0.183333333	0.516666667
ENSMUSG00000113010	AC159261.1	-	11.371	3.507297287	0.016651146	0.044371685	yes	up	0	0.75	0	0.83	1.03	0.12	0.25	0.66
MSTRG.19386		-	0.063	-3.978033356	0.016760725	0.044618424	yes	down	12.27	11.3	7.2	0	0	0	10.25666667	0
MSTRG.7214		-	46.862	5.550357636	0.016873825	0.044880517	yes	up	0	0	0	3.97	5.98	0	0	3.316666667
ENSMUSG00000039956	Mrap	melanocortin 2 receptor accessory protein [Source:MGI Symbol;Acc:MGI:1924287]	15.046	3.911279935	0.017116164	0.045433075	yes	up	0.05	0.18	0	0	0.09	0.51	0.076666667	0.2
ENSMUSG00000112266	AC091764.2	-	0.086	-3.540660648	0.017285641	0.045856453	yes	down	0.41	0.44	0.42	0	0.02	0	0.423333333	0.006666667
MSTRG.14627		-	0.087	-3.530223962	0.017351054	0.046003436	yes	down	1.12	0.79	0.48	0.04	0	0	0.796666667	0.013333333
ENSMUSG00000090002	Gm16006	predicted gene 16006 [Source:MGI Symbol;Acc:MGI:3801853]	0.063	-3.984818481	0.017444199	0.046217074	yes	down	1.94	1.51	0.75	0	0	0	1.4	0
MSTRG.26549		-	0.061	-4.045880587	0.017630824	0.046610778	yes	down	0.51	0.38	0.62	0	0	0	0.503333333	0
ENSMUSG00000044519	Zfp488	zinc finger protein 488 [Source:MGI Symbol;Acc:MGI:2686052]	0.084	-3.574329368	0.017787851	0.046971883	yes	down	0.12	0.13	0.16	0	0.01	0	0.136666667	0.003333333
MSTRG.19702		-	16.286	4.025592588	0.017819261	0.047048068	yes	up	0	0	0.1	0.05	0.25	0.14	0.033333333	0.146666667
MSTRG.7659		-	0.063	-3.989281749	0.017860225	0.047137035	yes	down	0.43	0.23	0.22	0	0	0	0.293333333	0
MSTRG.6198		-	13.799	3.786509424	0.017893139	0.047198061	yes	up	0.04	0.04	0.08	0.04	0	0.42	0.053333333	0.153333333
ENSMUSG00000095779	Gm2163	predicted gene 2163 [Source:MGI Symbol;Acc:MGI:3780332]	0.06	-4.065483891	0.017893644	0.047198061	yes	down	0.32	0.16	0.07	0	0	0	0.183333333	0
ENSMUSG00000097614	Gm26508	predicted gene, 26508 [Source:MGI Symbol;Acc:MGI:5477002]	0.063	-3.995341584	0.01792892	0.047240632	yes	down	0.39	0.47	0.16	0	0	0	0.34	0
ENSMUSG00000107306	Gm42577	predicted gene 42577 [Source:MGI Symbol;Acc:MGI:5662714]	10.305	3.365221129	0.01795228	0.047283851	yes	up	0	0.05	0.05	0.18	0	0.06	0.033333333	0.08
ENSMUSG00000045551	Fpr1	formyl peptide receptor 1 [Source:MGI Symbol;Acc:MGI:107443]	35.799	5.16184476	0.018019868	0.047441483	yes	up	0	0	0	0.03	0.09	0.03	0	0.05
ENSMUSG00000041523	Upk2	uroplakin 2 [Source:MGI Symbol;Acc:MGI:98913]	0.061	-4.032596829	0.018234713	0.047959044	yes	down	0.41	1.25	0.33	0	0	0	0.663333333	0
MSTRG.8697		-	21.289	4.412056074	0.018355344	0.048248707	yes	up	1.21	0	0	2.05	3.64	0	0.403333333	1.896666667
ENSMUSG00000109532	Gm44810	predicted gene 44810 [Source:MGI Symbol;Acc:MGI:5753386]	0.071	-3.822360877	0.01839853	0.048334586	yes	down	1.47	0.31	1.67	0.1	0	0	1.15	0.033333333
ENSMUSG00000105891	A230001M10Rik	RIKEN cDNA A230001M10 gene [Source:MGI Symbol;Acc:MGI:2443043]	0.058	-4.116942248	0.018508132	0.048580874	yes	down	1.68	3.36	0.49	0	0	0	1.843333333	0
ENSMUSG00000080985	Gm13559	predicted gene 13559 [Source:MGI Symbol;Acc:MGI:3651672]	0.041	-4.622871871	0.018518136	0.04859334	yes	down	0.12	0.32	1.99	0	0	0	0.81	0
MSTRG.6029		-	46.943	5.552832327	0.018526095	0.04859334	yes	up	0	0	0	0	11.51	10.65	0	7.386666667
MSTRG.13327		-	588.787	9.201601737	0.018609339	0.048776894	yes	up	0	0	0	0	0.48	0.22	0	0.233333333
ENSMUSG00000110018	5430437J10Rik	RIKEN cDNA 5430437J10 gene [Source:MGI Symbol;Acc:MGI:1918682]	46.873	5.550673369	0.018626082	0.048806866	yes	up	0	0	0	0.06	0.17	0	0	0.076666667
ENSMUSG00000020323	Prss57	protease, serine 57 [Source:MGI Symbol;Acc:MGI:1920356]	21.882	4.451692048	0.0186382	0.04883166	yes	up	0.03	0	0	0.25	0	0.06	0.01	0.103333333
MSTRG.29870		-	46.751	5.546916983	0.018752841	0.049104028	yes	up	0	0	0	10.69	4.84	0	0	5.176666667
MSTRG.21021		-	0.084	-3.567104385	0.018774484	0.049142472	yes	down	0.4	0.31	0.51	0	0	0.02	0.406666667	0.006666667
MSTRG.9933		-	0.063	-3.989629186	0.01886915	0.04933832	yes	down	0.47	0.7	0.21	0	0	0	0.46	0
ENSMUSG00000000305	Cdh4	cadherin 4 [Source:MGI Symbol;Acc:MGI:99218]	0.061	-4.036769946	0.018994489	0.04961666	yes	down	0.21	0.04	0.07	0	0	0	0.106666667	0
ENSMUSG00000083478	Gm15375	predicted gene 15375 [Source:MGI Symbol;Acc:MGI:3705815]	0.09	-3.469070552	0.019036883	0.049706214	yes	down	2.85	3.07	0.11	0	0.06	0.05	2.01	0.036666667
